# Supplementary material
Source: PubMed Central journal article supplement (PMC3218508)
Supplement: rna0803_0378SD1.pdf [file rna0803_0378SD1.pdf]

NGS-Mature .....AUUUGGGACUGAUCUUGAUGUC..... 5  
NGS-Mature .....GGGACUGAUCUUGAUGUCUGC..... 4  
NGS-Star .....ACAUCAAGAUCAGUCCCAAA..... 3  
NGS-Star .....GACAUCAAGAUAGUCCCAAAU..... 3  
NGS-Star .....GACAUCAAGAUCAGUCCCAAA..... 3  
NGS-Star .....AGCAUCAAGAUCAGUCCCAAAU..... 2  
NGS-Star .....GACAUCAAGAUCAGUCCCAAAU..... 2  
NGS-Star .....CAGACAUCAAGAUCAGUCC..... 1  
NGS-Star .....UGGCAGACAUCAAGAUCAGU..... 1  
NGS-Star .....GCAGACAUCAAGAUCAGUCC..... 1  
NGS-Star .....AGCAUCAAGAUCAGUCC..... 1

hsa-mir-3913-2 MI0016418 UGUCUAUAAUAAACUGAAUAAUUGGGACUGAUCUUGAUGUCUGCCAAAGGUUUUGGCAGACAUCAAGAUCAGUCCCAAAUUAUUCAGUUUAAUAAACA  
(((.....)))

hsa-miR-3913 MIMAT0018187 .....UUUGGGACUGAUCUUGAUGUC.....  
NGS-Mature .....UGGGACUGAUCUUGAUGUCU..... 21  
NGS-Mature .....UUUGGGACUGAUCUUGAUGUCU..... 20  
NGS-Mature .....UGGGACUGAUCUUGAUGUCUGC..... 12  
NGS-Mature .....UUGGGACUGAUCUUGAUGUCU..... 11  
NGS-Mature .....UGGGACUGAUCUUGAUGUC..... 10  
NGS-Mature .....UUUGGGACUGAUCUUGAUGUC..... 7  
NGS-Star .....ACAUCAAGAUCAGUCCCAAAU..... 6  
NGS-Mature .....UUGGGACUGAUCUUGAUGUC..... 6  
NGS-Mature .....UUGGGACUGAUCUUGAUGUCUG..... 5  
NGS-Mature .....AUUUGGGACUGAUCUUGAUGUC..... 5  
NGS-Mature .....GGGACUGAUCUUGAUGUCUGC..... 4  
NGS-Star .....ACAUCAAGAUCAGUCCCAAA..... 3  
NGS-Star .....GACAUCAAGAUCAGUCCCAAAU..... 3  
NGS-Star .....GACAUCAAGAUCAGUCCCAA..... 3  
NGS-Star .....AGACAUCAAGAUCAGUCCCAAAU..... 2  
NGS-Star .....GACAUCAAGAUCAGUCCCAAAU..... 2  
NGS-Star .....UGGCAGACAUCAAGAUCAGU..... 1  
NGS-Star .....CAGACAUCAAGAUCAGUCCCA..... 1  
NGS-Star .....AGACAUCAAGAUCAGUCC..... 1  
NGS-Star .....CAGACAUCAAGAUCAGUCC..... 1

hsa-mir-374c MI0016684 ACACGGACAAGUAUAUACAACCGUCUAAGUCUAGGACACUUAGCAGGUUGUAUUUAUCAUCCAGGAGU

hsa-miR-374c MIMAT0018443 .....AUAAUACAACCGUCUAGAGUC.....  
NGS-Mature .....AUAAUACAACCGUCUAGAGU..... 180  
NGS-Mature .....AUAAUACAACCGUCUAGAU..... 61  
NGS-Star .....ACUUAGCAGGUUGUAUUU..... 20  
NGS-Mature .....AAUACAACCGUCUAGAGU..... 18  
NGS-Star .....CUUAGCAGGUUGUAUUU..... 12  
NGS-Mature .....UAAUACAACCGUCUAGAU..... 11  
NGS-Mature .....AUAAUACAACCGUCUAGAGUC..... 8  
NGS-Mature .....UAAUACAACCGUCUAGAGU..... 7  
NGS-Star .....CUUAGCAGGUUGUAUUUA..... 6  
NGS-Star .....ACCUUAGCAGGUUGUAUU..... 6  
NGS-Mature .....AAUACAACCGUCUAGAU..... 5  
NGS-Mature .....ACAACCGUCUAGAGU..... 5  
NGS-Mature .....AAUACAACCGUCUAGAGUC..... 5  
NGS-Mature .....AUACAACCGUCUAGAGU..... 3  
NGS-Star .....CACUUAGCAGGUUGUAUUU..... 3  
NGS-Star .....ACUUAGCAGGUUGUAUUU..... 2  
NGS-Star .....ACUUAGCAGGUUGUAUUUA..... 1  
NGS-Star .....CACUUAGCAGGUUGUAUUU..... 1

hsa-mir-3691 MI0016092 UUGAGGCACUGGGUAGUGGAUGAUGGAGACUCGGUACCCACUGUGAGGGUGGGACCAAGUCUGCGUCAUCCUCUCCUAGUGCCUCAA  
(((.....)))

hsa-miR-3691 MIMAT0018120 .....AGUGGAUGAUGGAGACUCGGUAC.....  
NGS-Mature .....UAGUGGAUGAUGGAGACUCGGU..... 38  
NGS-Mature .....UAGUGGAUGAUGGAGACUCGG..... 36  
NGS-Mature .....UAGUGGAUGAUGGAGACUCGGU..... 24  
NGS-Mature .....AGUGGAUGAUGGAGACUCGGUAC..... 20  
NGS-Mature .....AGUGGAUGAUGGAGACUCGGUA..... 15  
NGS-Mature .....AGUGGAUGAUGGAGACUCGGU..... 11  
NGS-Mature .....UGGAUGAUGGAGACUCGGUA..... 9  
NGS-Star .....ACCAAGUCUGCGUCAUCCUC..... 9  
NGS-Star .....UGGGACCAAGUCUGCGUCAU..... 8  
NGS-Mature .....AGUGGAUGAUGGAGACUCGG..... 8  
NGS-Mature .....UAGUGGAUGAUGGAGACUCGG..... 8  
NGS-Star .....ACCAAGUCUGCGUCAUCCUC..... 7  
NGS-Mature .....GUGGAUGAUGGAGACUCGGUACCC..... 7  
NGS-Star .....ACCAAGUCUGCGUCAUCCUC..... 4  
NGS-Star .....CCAAGUCUGCGUCAUCCUC..... 4  
NGS-Star .....CCAAGUCUGCGUCAUCCUC..... 2  
NGS-Star .....GACCAAGUCUGCGUCAUCCUC..... 2  
NGS-Star .....CCAAGUCUGCGUCAUCCUC..... 2  
NGS-Star .....CAAGUCUGCGUCAUCCUC..... 2

```

NGS-Star ..... CCAAGUCUGCGUCAUCCUCC ..... 1

hsa-mir-3664 MI0016065 CUGUAAACUUGAAGGUAGGGAACUCUGUCUUCACUCUUGAGUACCUCCAACACGAGCUCUCAGGAGUAAAGACAGAGUCCCUACCUUCAUGUGGAU
..... (((((((((((((((((((((((((((((((((((((((((((((((((((((((((((((((((((((((((((((((((((((((((((((((((((
AACUCUGUCUUCACUCAUGAGU ..... UCUCAGGAGUAAAGACAGAGUU ..... 336
NGS-Star ..... CAGGAGUAAAGACAGAGUU ..... 121
NGS-Star ..... UCAGGAGUAAAGACAGAGUU ..... 119
NGS-Star ..... UCUCAGGAGUAAAGACAGAG ..... 106
NGS-Star ..... UCUCAGGAGUAAAGACAGA ..... 94
NGS-Star ..... UCUCAGGAGUAAAGACAG ..... 55
NGS-Star ..... UCUCAGGAGUAAAGACAGAGU ..... 49
NGS-Star ..... UCUCAGGAGUAAAGACAGAGUUC ..... 43
NGS-Mature ..... AACUCUGUCUUCACUCAUGAGU ..... 34
NGS-Star ..... CAGGAGUAAAGACAGAGUUC ..... 32
NGS-Star ..... CAGGAGUAAAGACAGAGUUC ..... 32
NGS-Mature ..... AACUCUGUCUUCACUCAUGAG ..... 8
NGS-Mature ..... AACUCUGUCUUCACUCAUGA ..... 5
NGS-Mature ..... ACUCUGUCUUCACUCAUGAGUA ..... 1
NGS-Mature ..... ACUCUGUCUUCACUCAUGAGU ..... 1
NGS-Mature ..... ACUCUGUCUUCACUCAUGAG ..... 1
NGS-Mature ..... AGGUAGGGAACUCUGUCU ..... 1
NGS-Mature ..... UCUGUCUUCACUCAUGAGUAC ..... 1

hsa-mir-3934 MI0016590 CACAGCCCUUCCUGUCCAGUUUCAGGUGGAAACUGAGGCGAGGAGGUAAGUAACUUGCUCAGGUUGCACAGCUGGGAAGUGGAGCAGGGAUUUGAAUCC
..... (((((((((((((((((((((((((((((((((((((((((((((((((((((((((((((((((((((((((((((((((((((((((((((((((((
UCAGGUGGGAACUGAGGCGAG ..... 710
NGS-Mature ..... UCAGGUGGGAACUGAGGCGAG ..... 684
NGS-Mature ..... UCAGGUGGGAACUGAGGCGAG ..... 400
NGS-Mature ..... UCAGGUGGGAACUGAGGCGAG ..... 113
NGS-Star ..... UGCUCAGGUUGCACAGCUGGGA ..... 19
NGS-Mature ..... UCAGGUGGGAACUGAGG ..... 13
NGS-Mature ..... AGGUGGGAACUGAGGCGAG ..... 11
NGS-Mature ..... UCAGGUGGGAACUGAGGCG ..... 10
NGS-Mature ..... UUUCAGGUGGGAACUGAGGCA ..... 9
NGS-Mature ..... UCAGGUGGGAACUGAGGCGAG ..... 6
NGS-Mature ..... AGGUGGGAACUGAGGCGAG ..... 6
NGS-Star ..... UGCUCAGGUUGCACAGCUGG ..... 2
NGS-Star ..... UGCUCAGGUUGCACAGCUGG ..... 2
NGS-Star ..... UGCUCAGGUUGCACAGCUGGGA ..... 1

hsa-mir-3942 MI0016599 UCUUCAGUAUGACACCUCUAAAGAAGCAUACUGUUACCCUAGAAUAGGCGGCAAGUAUACAGUAUUUACAGUAUUACAUUUUAGUGUCAUUAUUCACUGAC
..... (((((((((((((((((((((((((((((((((((((((((((((((((((((((((((((((((((((((((((((((((((((((((((((((((((
AAGCAUACUGUUACCUGAAA ..... 62
NGS-Mature ..... AGCAUACUGUUACCUGAAA ..... 58
NGS-Mature ..... AGCAUACUGUUACCUGAAA ..... 41
NGS-Star ..... UUCAGUAUACAGUAUUAUAC ..... 18
NGS-Mature ..... AGCAUACUGUUACCUGAAA ..... 13
NGS-Star ..... UUUCAGUAUACAGUAUUAUAC ..... 11
NGS-Mature ..... AAGCAUACUGUUACCUGAAA ..... 8
NGS-Mature ..... AGCAUACUGUUACCUGAAA ..... 5
NGS-Mature ..... AAGCAUACUGUUACCUGAAA ..... 5
NGS-Mature ..... AGCAUACUGUUACCUGAAA ..... 2
NGS-Mature ..... AGCAUACUGUUACCUGAAA ..... 1
NGS-Mature ..... CAUACUGUUACCUGAAA ..... 1
NGS-Star ..... UUCAGUAUACAGUAUUAUAC ..... 1
NGS-Star ..... UUUCAGUAUACAGUAUUAUAC ..... 1

hsa-mir-3617 MI0016007 AGGUCUAUAGAAAGACAUAGUUGCAAGAUUGGGAUUGAAACCAUAGUCUCAUCAGCACCCUAUGUCCUUUCUCUGCCCU
..... (((((((((((((((((((((((((((((((((((((((((((((((((((((((((((((((((((((((((((((((((((((((((((((((((((
AAAGCAUAGUUGCAAGAUUGG ..... 43
NGS-Mature ..... AAAGCAUAGUUGCAAGAUUGG ..... 46
NGS-Mature ..... AAAGCAUAGUUGCAAGAUUG ..... 5
NGS-Mature ..... AAAGCAUAGUUGCAAGAUUG ..... 4
NGS-Star ..... CAUCAGCACCCUAUGUCCUUUC ..... 2
NGS-Mature ..... AAAGCAUAGUUGCAAGA ..... 1
NGS-Mature ..... AGCAUAGUUGCAAGAUUGG ..... 1
NGS-Star ..... CAUCAGCACCCUAUGUCCUUUC ..... 1
NGS-Mature ..... AAAGCAUAGUUGCAAGAU ..... 1
NGS-Mature ..... ACAUAGUUGCAAGAUUGG ..... 1
NGS-Star ..... UCAUCAGCACCCUAUGUCCUUU ..... 1

hsa-mir-3619 MI0016009 ACGGCAUCUUUGCACUCAGCAGGCAGGCGUGGUCAGCCCGUGGUGGGGACCAUCCUGCCUGCUGGGGUAAAGACGGCGUGU
..... (((((((((((((((((((((((((((((((((((((((((((((((((((((((((((((((((((((((((((((((((((((((((((((((((((
UCAGCAGGCAGGCGUGGUCAG ..... 27
NGS-Mature ..... UCAGCAGGCAGGCGUGGUCAG ..... 19
NGS-Mature ..... UCAGCAGGCAGGCGUGGUCAG ..... 19

```

|                           |                                                                                                       |         |
|---------------------------|-------------------------------------------------------------------------------------------------------|---------|
| NGS-Mature                | UCAGCAGGCAGCGUGGUCAGC                                                                                 | 12      |
| NGS-Mature                | UCAGCAGGCAGCGUGGUCAGCC                                                                                | 12      |
| NGS-Mature                | UCAGCAGGCAGCGUGGUC                                                                                    | 10      |
| NGS-Mature                | UCAGCAGGCAGCGUGGUCAGCC                                                                                | 9       |
| NGS-Star                  | GGGACCAUCCUGCCUGUGG                                                                                   | 7       |
| NGS-Star                  | GGGACCAUCCUGCCUGUGGG                                                                                  | 5       |
| NGS-Star                  | GACCAUCCUGCCUGUGGGU                                                                                   | 2       |
| NGS-Star                  | GGGACCAUCCUGCCUGUG                                                                                    | 1       |
| NGS-Star                  | GGGACCAUCCUGCCUGCU                                                                                    | 1       |
| NGS-Star                  | GGGACCAUCCUGCCUGUG                                                                                    | 1       |
| NGS-Star                  | CCAUCCUGCCUGUGGG                                                                                      | 1       |
| NGS-Mature                | CAGCAGGCAGCGUGGUC                                                                                     | 1       |
| NGS-Mature                | ACUCAGCAGGCAGCGUGGUC                                                                                  | 1       |
| hsa-mir-3918 MI0016424    | AGGCGGUUAAAGCCAUGGGACAGGGCCGCAGAUAGGAGACUCUCAAGGUCAAAGGGGUUCCAGCUGGGACCUCAGCCUGGUUCGAGCCCU            |         |
| hsa-miR-3918 MIMAT0018192 | ACAGGGCCGCAGAUAGGAGACU                                                                                |         |
| NGS-Mature                | ACAGGGCCGCAGAUAGGAGACU                                                                                | 89      |
| NGS-Mature                | ACAGGGCCGCAGAUAGGAGAC                                                                                 | 14      |
| NGS-Mature                | GACAGGGCCGCAGAUAGGAGACU                                                                               | 11      |
| NGS-Mature                | ACAGGGCCGCAGAUAGGAGA                                                                                  | 7       |
| NGS-Star                  | UCUCCAGCUGGGACCUCGA                                                                                   | 6       |
| NGS-Mature                | GACAGGGCCGCAGAUAGGAGAC                                                                                | 4       |
| NGS-Mature                | GACAGGGCCGCAGAUAGGAGA                                                                                 | 3       |
| NGS-Mature                | ACAGGGCCGCAGAUAGGAGACUC                                                                               | 1       |
| NGS-Mature                | ACAGGGCCGCAGAUAGGAGACUC                                                                               | 1       |
| hsa-mir-3945 MI0016602    | GAUGUUGAUGCACGUGACGGGGAGGGCAUAGGAGAGGGUUAUUAUAAAUGCAAUUACAGCCUCUUAUGCUUCCAAGUGGGGAUGAUUCAUGAU         |         |
| hsa-miR-3945 MIMAT0018361 | AGGGCAUAGGAGAGGGUUAUUA                                                                                |         |
| NGS-Star                  | UACAGCCUUAUGCUUCCA                                                                                    | 6       |
| NGS-Mature                | AGGGCAUAGGAGAGGGUUAUUA                                                                                | 3       |
| NGS-Mature                | AGGGCAUAGGAGAGGGUUAUUA                                                                                | 1       |
| NGS-Mature                | AGGGCAUAGGAGAGGGUUAUUA                                                                                | 1       |
| NGS-Mature                | AGGGCAUAGGAGAGGGUUAUUA                                                                                | 1       |
| NGS-Mature                | CACGUGACGGGGAGGGCAUA                                                                                  | 1       |
| NGS-Star                  | ACAGCCUUAUGCUUCCA                                                                                     | 1       |
| NGS-Star                  | UACAGCCUUAUGCUUU                                                                                      | 1       |
| NGS-Star                  | UACAGCCUUAUGCUUUC                                                                                     | 1       |
| NGS-Star                  | UACAGCCUUAUGCUUCC                                                                                     | 1       |
| NGS-Mature                | GGGCAUAGGAGAGGGUUAUUA                                                                                 | 1       |
| NGS-Star                  | UACAGCCUUAUGCUUCCA                                                                                    | 1       |
| hsa-mir-3943 MI0016600    | CACACAGACGGCAGCUGCGGCCUAGCCCCAGGCCUUCACUUGCGGUGGACAACUUGCUAAGUAAAGUGGGGGUGGGCCACGGCUGGCCUCCUACCCUGGAC |         |
| hsa-miR-3943 MIMAT0018359 | UAGCCCCAGGCCUUCACUUGGCG                                                                               |         |
| NGS-Mature                | UAGCCCCAGGCCUUCACUUGGCG                                                                               | 58      |
| NGS-Mature                | UAGCCCCAGGCCUUCACUUGGCGU                                                                              | 14      |
| NGS-Star                  | UAAGUAAAGUGGGGGUGGG                                                                                   | 4       |
| NGS-Mature                | ACAGACGGCAGCUGCGGCC                                                                                   | 2       |
| NGS-Mature                | UAGCCCCAGGCCUUCACUUG                                                                                  | 2       |
| NGS-Mature                | UAGCCCCAGGCCUUCACUUGGC                                                                                | 2       |
| NGS-Star                  | UAAGUAAAGUGGGGGUGG                                                                                    | 1       |
| NGS-Star                  | CUAAGUAAAGUGGGGGUGGC                                                                                  | 1       |
| NGS-Mature                | UAGCCCCAGGCCUUCACUU                                                                                   | 1       |
| hsa-mir-3612 MI0016002    | GGGACUGGGGAUGAGGAGGAUCUUGAGAAUUGGAAGGAAUGGGAUUACUCCAGUUCACUAGAGGCGUCCUGACACCCUAGCUC                   |         |
| hsa-miR-3612 MIMAT0017989 | AGGAGGCAUCUUGAGAAUUGGA                                                                                |         |
| NGS-Mature                | AGGAGGCAUCUUGAGAAUUGGA                                                                                | 16      |
| NGS-Mature                | AGGAGGCAUCUUGAGAAUUGG                                                                                 | 13      |
| NGS-Star                  | AGUUCACUAGAGGCGUCCUGACA                                                                               | 7       |
| NGS-Mature                | AGGAGGCAUCUUGAGAAUUGGA                                                                                | 7       |
| NGS-Star                  | AGUUCACUAGAGGCGUCCUGAC                                                                                | 4       |
| NGS-Star                  | CAGUUCACUAGAGGCGUCCUGA                                                                                | 3       |
| NGS-Star                  | CAGUUCACUAGAGGCGUCCU                                                                                  | 1       |
| NGS-Star                  | AGUUCACUAGAGGCGUCCU                                                                                   | 1       |
| NGS-Star                  | AGUUCACUAGAGGCGUCCUGA                                                                                 | 1       |
| hsa-let-7c MI0000064      | GCAUCCGGUUGAGGUAGUAGGUUGUUAUGGUUAUAGGUUACACCCUGGGAGUUAACUGUACAACCUUUCUAGCUUCCUUGGAGC                  |         |
| hsa-let-7c* MIMAT0004483  | UAGAGUUAACCCUGGGAGUUA                                                                                 |         |
| hsa-let-7c MIMAT0000064   | UGAGGUAGUAGGUUGUUAUGGUU                                                                               |         |
| NGS-Mature                | UGAGGUAGUAGGUUGUUAUGGUU                                                                               | 4673736 |
| NGS-Mature                | UGAGGUAGUAGGUUGUUAUGGUU                                                                               | 529122  |
| NGS-Mature                | UGAGGUAGUAGGUUGUUAUGGUUU                                                                              | 489784  |
| NGS-Mature                | UGAGGUAGUAGGUUGUUAU                                                                                   | 188757  |
| NGS-Mature                | UGAGGUAGUAGGUUGUUAUGG                                                                                 | 99004   |
| NGS-Mature                | UGAGGUAGUAGGUUGUUAUG                                                                                  | 41931   |
| NGS-Mature                | GAGGUAGUAGGUUGUUAUGGUU                                                                                | 12801   |

|            |                                     |       |
|------------|-------------------------------------|-------|
| NGS-Mature | .....UUGAGGUAGUAGGUUGUAUGGUU.....   | 10284 |
| NGS-Mature | .....UGAGGUAGUAGGUUGUAUGGUUUA.....  | 9108  |
| NGS-Mature | .....UUGAGGUAGUAGGUUGUAUGGU.....    | 6406  |
| NGS-Star   | .....CUGUACAACCUUCUAGCUUUC.....     | 61    |
| NGS-Star   | .....CUGUACAACCUUCUAGCUUUC.....     | 12    |
| NGS-Star   | .....CUGUACAACCUUCUAGCUUU.....      | 10    |
| NGS-Star   | .....UUAACUGUACAACCUUCUAGCUUUC..... | 3     |
| NGS-Star   | .....CUGUACAACCUUCUAGCUUUCU.....    | 3     |
| NGS-Star   | .....CUGUACAACCUUCUAGCUU.....       | 3     |
| NGS-Star   | .....AACUGUACAACCUUCUAGCUUUC.....   | 3     |
| NGS-Star   | .....UACACCCUGGGAGUUAACU.....       | 2     |
| NGS-Star   | .....CUGUACAACCUUCUAGCU.....        | 2     |
| NGS-Star   | .....GUUAACUGUACAACCUUCUAGC.....    | 1     |

|                         |                                                                                    |       |
|-------------------------|------------------------------------------------------------------------------------|-------|
| hsa-mir-194-1 MI000488  | AUGGUGUUAUCAAGUGUAACAGCAACUCCAUUGGAGCUGUGUACCAUUUCCAGUGGAGAGUCUGUUAUUUGAUGGUUACCAA |       |
| hsa-miR-194 MIMAT000460 | .....UGUAAACAGCAACUCCAUUGGGA.....                                                  |       |
| NGS-Mature              | .....UGUAAACAGCAACUCCAUUGGGA.....                                                  | 46188 |
| NGS-Mature              | .....UGUAAACAGCAACUCCAUUGG.....                                                    | 16186 |
| NGS-Mature              | .....UGUAAACAGCAACUCCAUUGG.....                                                    | 779   |
| NGS-Mature              | .....UGUAAACAGCAACUCCAUUGGAC.....                                                  | 719   |
| NGS-Mature              | .....GUAACAGCAACUCCAUUGGGA.....                                                    | 369   |
| NGS-Mature              | .....UGUAAACAGCAACUCCAUUG.....                                                     | 361   |
| NGS-Mature              | .....UGUAAACAGCAACUCCAUUG.....                                                     | 192   |
| NGS-Mature              | .....GUAACAGCAACUCCAUUGGG.....                                                     | 117   |
| NGS-Mature              | .....UGUAAACAGCAACUCCAUUGGACU.....                                                 | 74    |
| NGS-Mature              | .....UGUAAACAGCAACUCCA.....                                                        | 67    |
| NGS-Star                | .....CCAGUGGAGAGUCUGUUAC.....                                                      | 3     |
| NGS-Star                | .....CAGUGGAGAGUCUGUUACUU.....                                                     | 2     |
| NGS-Star                | .....CCAGUGGAGAGUCUGUUACUU.....                                                    | 2     |
| NGS-Star                | .....CAGUGGAGAGUCUGUUACUU.....                                                     | 1     |
| NGS-Star                | .....CCAGUGGAGAGUCUGUUACUU.....                                                    | 1     |
| NGS-Star                | .....CAGUGGAGAGUCUGUUACUUU.....                                                    | 1     |

|                         |                                                                                                |      |
|-------------------------|------------------------------------------------------------------------------------------------|------|
| hsa-mir-345 MI000825    | ACCCAAACCCUAGGUCUGCAGACUCCUAGUCCAGGGCUCUGUAGGCGUGGGCCCGAACAGAGGGGUCUGGAGGCCUGGGUUUGAAUUCGACAGC |      |
| hsa-miR-345 MIMAT000772 | .....GCUGACUCCUAGUCCAGGGCUC.....                                                               |      |
| NGS-Mature              | .....GCUGACUCCUAGUCCAGGGCUC.....                                                               | 5391 |
| NGS-Mature              | .....GCUGACUCCUAGUCCAGGGCUC.....                                                               | 3627 |
| NGS-Mature              | .....GCUGACUCCUAGUCCAGG.....                                                                   | 1261 |
| NGS-Mature              | .....GCUGACUCCUAGUCCAGGGC.....                                                                 | 1086 |
| NGS-Mature              | .....GCUGACUCCUAGUCCAGGG.....                                                                  | 945  |
| NGS-Star                | .....GCCUGAACGAGGGGUCUGGAG.....                                                                | 91   |
| NGS-Mature              | .....GCUGACUCCUAGUCCAGGGCUCG.....                                                              | 88   |
| NGS-Star                | .....CCUGAACGAGGGGUCUGGAG.....                                                                 | 50   |
| NGS-Mature              | .....GCUGACUCCUAGUCCAGGGCUCGU.....                                                             | 49   |
| NGS-Mature              | .....UGACUCCUAGUCCAGGGCUC.....                                                                 | 29   |
| NGS-Star                | .....GCCUGAACGAGGGGUCUGGA.....                                                                 | 28   |
| NGS-Mature              | .....UGACUCCUAGUCCAGGGCUC.....                                                                 | 18   |
| NGS-Star                | .....GCCUGAACGAGGGGUCUGG.....                                                                  | 13   |
| NGS-Mature              | .....CUGACUCCUAGUCCAGGGCUC.....                                                                | 11   |
| NGS-Star                | .....GCCUGAACGAGGGGUCUG.....                                                                   | 10   |
| NGS-Star                | .....CCUGAACGAGGGGUCUGGAG.....                                                                 | 3    |
| NGS-Star                | .....GCCUGAACGAGGGGUCU.....                                                                    | 3    |
| NGS-Star                | .....CCUGAACGAGGGGUCUGG.....                                                                   | 3    |
| NGS-Star                | .....CCUGAACGAGGGGUCUGGA.....                                                                  | 2    |
| NGS-Star                | .....GCCUGUUUGAAUUCGACA.....                                                                   | 1    |

|                       |                                                                                                          |        |
|-----------------------|----------------------------------------------------------------------------------------------------------|--------|
| hsa-mir-7-3 MI000265  | AGAUAAGAGUGGUCUGGUCUAGUGUCUGUGUGGAAGACUAGUGAUUUUGUUGUUCUAGUACUACGACAACAGUCACAGCCGCCUCAUAGCGCAGACUCCUUGGC |        |
| hsa-miR-7 MIMAT000252 | .....UGGAAGACUAGUGAUUUUGUUGU.....                                                                        |        |
| NGS-Mature            | .....UGGAAGACUAGUGAUUUUGUUGU.....                                                                        | 339301 |
| NGS-Mature            | .....UGGAAGACUAGUGAUUUUGUUGU.....                                                                        | 111131 |
| NGS-Mature            | .....UGGAAGACUAGUGAUUUUGUUG.....                                                                         | 12367  |
| NGS-Mature            | .....ACUAGUGAUUUUGUUGU.....                                                                              | 10129  |
| NGS-Mature            | .....AGACUAGUGAUUUUGUUGU.....                                                                            | 7096   |
| NGS-Mature            | .....UGGAAGACUAGUGAUUUUGUUGU.....                                                                        | 5679   |
| NGS-Mature            | .....UGGAAGACUAGUGAUUUUGU.....                                                                           | 5483   |
| NGS-Mature            | .....UGGAAGACUAGUGAUUUUG.....                                                                            | 2442   |
| NGS-Mature            | .....AGACUAGUGAUUUUGUUGU.....                                                                            | 2436   |
| NGS-Mature            | .....GACUAGUGAUUUUGUUGU.....                                                                             | 1777   |
| NGS-Star              | .....CAACAAGUCAAGCCGGCCUCA.....                                                                          | 364    |
| NGS-Star              | .....CAACAAGUCAAGCCGGCCUC.....                                                                           | 28     |
| NGS-Star              | .....CAACAAGUCAAGCCGGCCUCA.....                                                                          | 22     |
| NGS-Star              | .....AAACAAGUCAAGCCGGCCUCA.....                                                                          | 14     |
| NGS-Star              | .....CAACAAGUCAAGCCGGCCUC.....                                                                           | 10     |
| NGS-Star              | .....CAACAAGUCAAGCCGGCC.....                                                                             | 9      |
| NGS-Star              | .....AAACAAGUCAAGCCGGCCUC.....                                                                           | 2      |
| NGS-Star              | .....AAACAAGUCAAGCCGGCCUCA.....                                                                          | 2      |
| NGS-Star              | .....CUGAUGUACUACGACAACAAGU.....                                                                         | 1      |

```

NGS-Star .....UAGCGCAGACUCCUUCGAC 1

hsa-mir-181b-2 MI000683 CUGAUGGCUGCACUCAACAUAUUGCUGUCGGUGGGUUUAGUCUGAAUCAACUCACUGAUAUUGAAUGCAAACUGCGGACCAACA
...((((((((((((((((((((((((((((((((((((((((((((((((((((((((((((((((((((((((((((((((((((((((((((((((
hsa-miR-181b MIMAT000257 AACAUUCAUUGCUGUCGGUGGGU
NGS-Mature AACAUUCAUUGCUGUCGGUGGU 118381
NGS-Mature AACAUUCAUUGCUGUCGGUGGG 46722
NGS-Mature AACAUUCAUUGCUGUCGGUGGU 35542
NGS-Mature AACAUUCAUUGCUGUCGGUG 29066
NGS-Mature AACAUUCAUUGCUGUCGGUGGGU 26435
NGS-Mature AACAUUCAUUGCUGUCGGU 20714
NGS-Mature AACAUUCAUUGCUGUCGGUGG 4365
NGS-Mature ACAUUCAUUGCUGUCGGUGGU 1949
NGS-Mature CAACAUAUCAUUGCUGUCGGUG 1521
NGS-Mature ACAUUCAUUGCUGUCGGUGGU 893
NGS-Star CUCACUGAUAUUGAAUGCA 57
NGS-Star CUCACUGAUAUUGAAUGCAA 45
NGS-Star CUCACUGAUAUUGAAUGCAA 37
NGS-Star ACUCACUGAUAUUGAAUGCA 33
NGS-Star ACUCACUGAUAUUGAAUGCAA 17
NGS-Star CUCACUGAUAUUGAAUGC 11
NGS-Star ACUCACUGAUAUUGAAU 4
NGS-Star ACUCACUGAUAUUGAAUGC 4
NGS-Star AACUCACUGAUAUUGAAUGCA 3
NGS-Star ACUCACUGAUAUUGAAUG 2

hsa-mir-196a-1 MI000238 GUGAAUUGAGUAGUUCAUGUUGUUGGGCCUGGGUUUCUGAACACAACAUAUAAACCACCCGAUUCAC
((((((((((((((((((((((((((((((((((((((((((((((((((((((((((((((((((((((((((((((((((((((((((((((((
hsa-miR-196a MIMAT000226 UAGGUAGUUUCAUGUUGUUGGG
NGS-Mature UAGGUAGUUUCAUGUUGUUGGG 19707
NGS-Mature UAGGUAGUUUCAUGUUGUUGG 3969
NGS-Mature UAGGUAGUUUCAUGUUGU 1628
NGS-Mature UAGGUAGUUUCAUGUUGU 683
NGS-Mature UAGGUAGUUUCAUGUUGUU 469
NGS-Mature AGGUAGUUUCAUGUUGUUGGG 397
NGS-Mature AGGUAGUUUCAUGUUGUUGGC 130
NGS-Mature GGUAGUUUCAUGUUGUUGGG 81
NGS-Mature AGGUAGUUUCAUGUUGUUGG 75
NGS-Mature UAGGUAGUUUCAUGUUGUUGGC 74
NGS-Star CAACAACAUAUAAACCACCCGA 37
NGS-Star ACAACAACAUAUAAACCACCCGA 33
NGS-Star CAACAACAUAUAAACCACCCGAU 25
NGS-Star ACAACAACAUAUAAACCACCCG 4
NGS-Star ACAACAACAUAUAAACCACCCGAU 1

hsa-mir-503 MI0003188 UGCCUAGCAGCGGGAACAGUUCGUCAGUGAGCGAUCGGGUCUCUGGGUAUUGUUUCCGUCGCCGGGUA
((((((((((((((((((((((((((((((((((((((((((((((((((((((((((((((((((((((((((((((((((((((((((((((((
hsa-miR-503 MIMAT0002874 UAGCAGCGGGAACAGUUCGUCAG
NGS-Mature UAGCAGCGGGAACAGUUCGUCAG 11230
NGS-Mature UAGCAGCGGGAACAGUUCU 7499
NGS-Mature UAGCAGCGGGAACAGUUC 6284
NGS-Mature UAGCAGCGGGAACAGUUCGCA 3489
NGS-Mature UAGCAGCGGGAACAGUUCG 1978
NGS-Mature AGCGGGAACAGUUCGUCAG 898
NGS-Mature UAGCAGCGGGAACAGUUCGUCAGU 784
NGS-Mature UAGCAGCGGGAACAGUUCGUC 606
NGS-Mature AGCAGCGGGAACAGUUCGUCAG 263
NGS-Mature GCAGCGGGAACAGUUCGUCAG 241
NGS-Star GGGUAUUGUUUCCGUCGCCAGG 168
NGS-Star GGGUAUUGUUUCCGUCGCCAGG 23
NGS-Star GGGUAUUGUUUCCGUCGCCAG 12
NGS-Star GGGUAUUGUUUCCGUCGCCA 10
NGS-Star GGGUAUUGUUUCCGUCGCC 4
NGS-Star GUGAGCGAUCGGUCUCUGGGUUAU 4
NGS-Star UGGGUAUUGUUUCCGUCGCCA 3
NGS-Star GGGUAUUGUUUCCGUCGCCAG 3
NGS-Star GGGUAUUGUUUCCGUCGC 2
NGS-Star UGUUCCGUCGCCAGG 2
NGS-Star AUUGUUUCCGUCGCCAGG 1

hsa-mir-660 MI0003684 CUGCUCUUCUCCAUACCAUUGCAUAUCGGAGUUGGAAUUCUAAAACACCUCUGUGUGCAUGGAUACAGGAGGGUGACCCUUGUCAUCUG
...((((((((((((((((((((((((((((((((((((((((((((((((((((((((((((((((((((((((((((((((((((((((((((((((
hsa-miR-660 MIMAT0003338 UACCCAUGCAUAUCGGAGUUG
NGS-Mature UACCCAUGCAUAUCGGAGUUG 8757
NGS-Mature UACCCAUGCAUAUCGGAGUUG 6663
NGS-Mature UACCCAUGCAUAUCGGAGUU 3515
NGS-Mature UACCCAUGCAUAUCGGAGU 462
NGS-Mature UACCCAUGCAUAUCGGAG 431
NGS-Star ACCUCUGUGUGCAUGGAUA 283
NGS-Star ACCUCUGUGUGCAUGGAUAC 276

```

|                           |                                                                                               |      |
|---------------------------|-----------------------------------------------------------------------------------------------|------|
| NGS-Star                  | .....ACCUCUGUGUGCAUGGAUU.....                                                                 | 247  |
| NGS-Mature                | .....UACCAUUGCAUUCGGGA.....                                                                   | 139  |
| NGS-Star                  | .....ACCUCUGUGUGCAUGGAUACA.....                                                               | 113  |
| NGS-Mature                | .....ACCAUUGCAUUCGGAGUUGU.....                                                                | 106  |
| NGS-Star                  | .....ACCUCUGUGUGCAUGGAU.....                                                                  | 69   |
| NGS-Mature                | .....ACCAUUGCAUUCGGAGUUG.....                                                                 | 66   |
| NGS-Mature                | .....ACCAUUGCAUUCGGAGUUG.....                                                                 | 26   |
| NGS-Mature                | .....UACCAUUGCAUUCGGAGUUG.....                                                                | 26   |
| NGS-Star                  | .....ACCUCUGUGUGCAUGGA.....                                                                   | 13   |
| NGS-Star                  | .....CCUCUGUGUGCAUGGAUUA.....                                                                 | 7    |
| NGS-Star                  | .....CCUCUGUGUGCAUGGAUUAACA.....                                                              | 7    |
| NGS-Star                  | .....CCUCUGUGUGCAUGGAUUAAC.....                                                               | 7    |
| NGS-Star                  | .....CCUCUGUGUGCAUGGAUU.....                                                                  | 4    |
| hsa-mir-1271 MI0003814    | CACCCAGAUCAGUGCUUGGCACCUAGCAGCACUCAGUAAAUAUUUUGUAGUGCCUCUAUGGCCAGGCAUUGUGCUGAGGGCU            |      |
| hsa-miR-1271 MIMAT0005796 | ..(((.....(((.....(((.....(((.....(((.....(((.....(((.....(((.....))))))))))))))))))))))..... |      |
| NGS-Mature                | .....CUUGGCACCUAGCAAGCACUCA.....                                                              | 3477 |
| NGS-Mature                | .....CUUGGCACCUAGCAAGCACUC.....                                                               | 814  |
| NGS-Mature                | .....CUUGGCACCUAGCAAGCACUC.....                                                               | 723  |
| NGS-Mature                | .....CUUGGCACCUAGCAAGCAC.....                                                                 | 433  |
| NGS-Star                  | .....AGUGCCUCUAUGGCCAGGCA.....                                                                | 123  |
| NGS-Star                  | .....AGUGCCUCUAUGGCCAGG.....                                                                  | 79   |
| NGS-Star                  | .....AGUGCCUCUAUGGCCAG.....                                                                   | 61   |
| NGS-Mature                | .....CUUGGCACCUAGCAAGCA.....                                                                  | 59   |
| NGS-Star                  | .....AGUGCCUCUAUGGCCA.....                                                                    | 51   |
| NGS-Star                  | .....AGUGCCUCUAUGGCCAGGC.....                                                                 | 46   |
| NGS-Mature                | .....UUGGCACCUAGCAAGCACUCA.....                                                               | 40   |
| NGS-Star                  | .....AGUGCCUCUAUGGCCAGGCAUU.....                                                              | 19   |
| NGS-Mature                | .....CUUGGCACCUAGCAAGCACUCAG.....                                                             | 16   |
| NGS-Mature                | .....UUGGCACCUAGCAAGCACUC.....                                                                | 11   |
| NGS-Mature                | .....UUGGCACCUAGCAAGCACUC.....                                                                | 10   |
| NGS-Star                  | .....AGUGCCUCUAUGGCCAGGCAU.....                                                               | 7    |
| NGS-Mature                | .....UUGGCACCUAGCAAGCAC.....                                                                  | 4    |
| NGS-Star                  | .....GUGCCUCUAUGGCCAGGCA.....                                                                 | 3    |
| NGS-Star                  | .....GUGCCUCUAUGGCCAGG.....                                                                   | 1    |
| NGS-Star                  | .....GUGCCUCUAUGGCCAGG.....                                                                   | 1    |
| hsa-mir-1304 MI0006371    | AAACACUUGAGCCCAGCGGUUUGAGGCCUACAGUGAGAUGUGAUCCUGCCACUCACUGUAGCCUCGAACCCUGGGCUAAGUGAUUCA       |      |
| hsa-miR-1304 MIMAT0005892 | ..(((.....(((.....(((.....(((.....(((.....(((.....(((.....(((.....))))))))))))))))))))))..... |      |
| NGS-Mature                | .....UUUGAGGCCUACAGUGAGUUG.....                                                               | 1104 |
| NGS-Mature                | .....CGGUUUGAGGCCUACAGUGAGU.....                                                              | 141  |
| NGS-Mature                | .....CGGUUUGAGGCCUACAGUGAGA.....                                                              | 141  |
| NGS-Mature                | .....UUUGAGGCCUACAGUGAGUUG.....                                                               | 101  |
| NGS-Mature                | .....UUUGAGGCCUACAGUGAGUUG.....                                                               | 50   |
| NGS-Mature                | .....GGUUUGAGGCCUACAGUGAGU.....                                                               | 45   |
| NGS-Mature                | .....UUUGAGGCCUACAGUGAGUUG.....                                                               | 38   |
| NGS-Mature                | .....CGGUUUGAGGCCUACAGUGAG.....                                                               | 33   |
| NGS-Mature                | .....GGUUUGAGGCCUACAGUGAGU.....                                                               | 26   |
| NGS-Star                  | .....UCUCACUGUAGCCUCGAACCCC.....                                                              | 15   |
| NGS-Mature                | .....CGGUUUGAGGCCUACAGUG.....                                                                 | 12   |
| NGS-Mature                | .....CGGUUUGAGGCCUACAGUGAGU.....                                                              | 12   |
| NGS-Star                  | .....UCUCACUGUAGCCUCGAAC.....                                                                 | 7    |
| NGS-Star                  | .....CUCACUGUAGCCUCGAACCCCU.....                                                              | 6    |
| NGS-Star                  | .....UCUCACUGUAGCCUCGAACCC.....                                                               | 6    |
| NGS-Star                  | .....UCUCACUGUAGCCUCGAACCC.....                                                               | 4    |
| NGS-Star                  | .....AUCUCACUGUAGCCUCGAACCCC.....                                                             | 3    |
| NGS-Star                  | .....CUCACUGUAGCCUCGAACCCC.....                                                               | 2    |
| NGS-Star                  | .....UCUCACUGUAGCCUCGAACCCCU.....                                                             | 2    |
| NGS-Star                  | .....UCACUGUAGCCUCGAACCCCU.....                                                               | 1    |
| NGS-Star                  | .....CCUGGCCUCAAGUGAUUC.....                                                                  | 1    |
| hsa-mir-190 MI0000486     | UGCAGGCCUCUGUGUAUUGUUUAUUAUUUAGGUUUGUUUUUAUCCAACUAUUAUCAAACAUAUUCUACAGUGUCUUUGCC              |      |
| hsa-miR-190 MIMAT0000458  | ..(((.....(((.....(((.....(((.....(((.....(((.....(((.....(((.....))))))))))))))))))))))..... |      |
| NGS-Mature                | .....UGAUUUGUUUAUUAUUUAGGU.....                                                               | 2416 |
| NGS-Mature                | .....UGAUUUGUUUAUUAUUUAGGU.....                                                               | 678  |
| NGS-Mature                | .....UGAUUUGUUUAUUAUUUAGGU.....                                                               | 419  |
| NGS-Mature                | .....UGAUUUGUUUAUUAUUUAGG.....                                                                | 402  |
| NGS-Mature                | .....UGAUUUGUUUAUUAUUUA.....                                                                  | 151  |
| NGS-Star                  | .....ACUAUUAUCAAACAUAUUCU.....                                                                | 99   |
| NGS-Mature                | .....UGAUUUGUUUAUUAUUUAGGU.....                                                               | 85   |
| NGS-Mature                | .....GAUUAUUGUUUAUUAUUUAGGU.....                                                              | 33   |
| NGS-Mature                | .....UGAUUUGUUUAUUAUU.....                                                                    | 21   |
| NGS-Star                  | .....CUAUUAUCAAACAUAUUCU.....                                                                 | 17   |
| NGS-Mature                | .....GAUUAUUGUUUAUUAUUAGGU.....                                                               | 8    |
| NGS-Mature                | .....GAUUAUUGUUUAUUAUUUA.....                                                                 | 7    |
| NGS-Star                  | .....CUAUUAUCAAACAUAUUCU.....                                                                 | 7    |
| NGS-Star                  | .....ACUAUUAUCAAACAUAUUCU.....                                                                | 6    |
| NGS-Star                  | .....ACUAUUAUCAAACAUAUUC.....                                                                 | 3    |

|                           |                                                                                                                                                       |       |
|---------------------------|-------------------------------------------------------------------------------------------------------------------------------------------------------|-------|
| NGS-Star                  | .....ACUAUAUAUCAAAUCAUAUU.....                                                                                                                        | 2     |
| NGS-Star                  | .....ACUAUAUAUCAAAUCAUAUU.....                                                                                                                        | 2     |
| NGS-Star                  | .....CUAUAUAUCAAAUCAUAUCC.....                                                                                                                        | 1     |
| hsa-mir-450a-2 MI0003187  | CCAAAGAAAGAUUCUAAACUAUUUUUGCGAUGUGUUCUAAUAUGUAUUAAUAAUGUAUUUGGGACAUUUUGCAUUCUAGUUUUUAUCAUAAUAUUGG<br>.....(((((((.....(((((((.....))))))))))))))..... | 2     |
| hsa-miR-450a MIMAT0001545 | .....UUUUGCGAUGUGUCCUAUAUU.....                                                                                                                       | 2087  |
| NGS-Mature                | .....UUUUGCGAUGUGUCCUAUAUU.....                                                                                                                       | 700   |
| NGS-Mature                | .....UUUUGCGAUGUGUCCUAUAUU.....                                                                                                                       | 650   |
| NGS-Star                  | .....UUUUGCGAUGUGUCCUAUAUU.....                                                                                                                       | 495   |
| NGS-Star                  | .....UUUUGCGAUGUGUCCUAUAUU.....                                                                                                                       | 475   |
| NGS-Mature                | .....UUUUGCGAUGUGUCCUAUU.....                                                                                                                         | 420   |
| NGS-Mature                | .....UUUUGCGAUGUGUCCUAUU.....                                                                                                                         | 161   |
| NGS-Star                  | .....UUUUGCGAUGUGUCCUAUU.....                                                                                                                         | 127   |
| NGS-Star                  | .....UUUUGCGAUGUGUCCUAUU.....                                                                                                                         | 79    |
| NGS-Mature                | .....UUUUGCGAUGUGUCCUAUAUU.....                                                                                                                       | 37    |
| NGS-Star                  | .....UUUUGCGAUGUGUCCUAUAUU.....                                                                                                                       | 35    |
| NGS-Mature                | .....UUUUGCGAUGUGUCCUAUAUU.....                                                                                                                       | 30    |
| NGS-Mature                | .....UUUUGCGAUGUGUCCUAUAUU.....                                                                                                                       | 23    |
| NGS-Star                  | .....UUUUGCGAUGUGUCCUAUU.....                                                                                                                         | 21    |
| NGS-Star                  | .....UUUUGCGAUGUGUCCUAUU.....                                                                                                                         | 19    |
| NGS-Mature                | .....UUUUGCGAUGUGUCCUAUU.....                                                                                                                         | 17    |
| NGS-Star                  | .....UUUUGCGAUGUGUCCUAUU.....                                                                                                                         | 14    |
| NGS-Mature                | .....UUUUGCGAUGUGUCCUAUU.....                                                                                                                         | 14    |
| NGS-Star                  | .....UUUUGCGAUGUGUCCUAUU.....                                                                                                                         | 11    |
| NGS-Star                  | .....UUUUGCGAUGUGUCCUAUU.....                                                                                                                         | 11    |
| hsa-mir-584 MI0003591     | UAGGGUGACCAGCCAUUAUGGUUUUGCCUGGGACUGAGGAAUUUGCUGGGAAUAGUCAGUUCAGGCCAACCAGGCGUGGUUGGUCUCCCGAAGCAAC<br>(((((((.....(((((((.....)))))))))))))).....      | 15880 |
| hsa-miR-584 MIMAT0003249  | .....UUAUGGUUUUGCCUGGGACUGAG.....                                                                                                                     | 873   |
| NGS-Mature                | .....UUAUGGUUUUGCCUGGGACUGA.....                                                                                                                      | 633   |
| NGS-Mature                | .....UUAUGGUUUUGCCUGGGACUG.....                                                                                                                       | 402   |
| NGS-Mature                | .....UUAUGGUUUUGCCUGGGACUG.....                                                                                                                       | 262   |
| NGS-Mature                | .....UUAUGGUUUUGCCUGGGAC.....                                                                                                                         | 218   |
| NGS-Star                  | .....UUAUGGUUUUGCCUGGGAC.....                                                                                                                         | 179   |
| NGS-Mature                | .....UUAUGGUUUUGCCUGGGACUGAGG.....                                                                                                                    | 140   |
| NGS-Star                  | .....UUAUGGUUUUGCCUGGGACUGAG.....                                                                                                                     | 62    |
| NGS-Mature                | .....UUAUGGUUUUGCCUGGGACUGA.....                                                                                                                      | 46    |
| NGS-Mature                | .....UUAUGGUUUUGCCUGGGACUG.....                                                                                                                       | 39    |
| NGS-Star                  | .....UUAUGGUUUUGCCUGGGACUG.....                                                                                                                       | 35    |
| NGS-Mature                | .....UUAUGGUUUUGCCUGGGACUGA.....                                                                                                                      | 22    |
| NGS-Star                  | .....UUAUGGUUUUGCCUGGGAC.....                                                                                                                         | 8     |
| NGS-Star                  | .....UUAUGGUUUUGCCUGGGAC.....                                                                                                                         | 2     |
| NGS-Star                  | .....UUAUGGUUUUGCCUGGGAC.....                                                                                                                         | 2     |
| NGS-Star                  | .....UUAUGGUUUUGCCUGGGAC.....                                                                                                                         | 1     |
| hsa-mir-641 MI0003656     | UGGGUGAAAGGAAGGAAGACAUAGGAUAGAGUCACCUCUGUCCUCUGUCCUACCUAUAAGAGGUGACUGUCCUAUGUCUUUCCUUAUCCCUUACCCCU<br>(((((((.....(((((((.....)))))))))))))).....     | 1063  |
| hsa-miR-641 MIMAT0003311  | .....AAAGACAUAGGAUAGAGUCACCUC.....                                                                                                                    | 638   |
| NGS-Mature                | .....AAAGACAUAGGAUAGAGUCACCUC.....                                                                                                                    | 605   |
| NGS-Mature                | .....AAAGACAUAGGAUAGAGUCA.....                                                                                                                        | 473   |
| NGS-Mature                | .....AAAGACAUAGGAUAGAGUCACCUC.....                                                                                                                    | 393   |
| NGS-Star                  | .....AAAGACAUAGGAUAGAGUCACCUC.....                                                                                                                    | 99    |
| NGS-Mature                | .....AAAGACAUAGGAUAGAGUCACCUC.....                                                                                                                    | 87    |
| NGS-Mature                | .....AAAGACAUAGGAUAGAGUCACCUC.....                                                                                                                    | 63    |
| NGS-Mature                | .....GAAAGACAUAGGAUAGAGUCACCUC.....                                                                                                                   | 57    |
| NGS-Mature                | .....AAAGACAUAGGAUAGAGUCACCUC.....                                                                                                                    | 57    |
| NGS-Mature                | .....AAAGACAUAGGAUAGAGUC.....                                                                                                                         | 54    |
| NGS-Star                  | .....AAAGACAUAGGAUAGAGUC.....                                                                                                                         | 53    |
| NGS-Star                  | .....AAAGACAUAGGAUAGAGUC.....                                                                                                                         | 8     |
| NGS-Star                  | .....AAAGACAUAGGAUAGAGUC.....                                                                                                                         | 6     |
| NGS-Star                  | .....AAAGACAUAGGAUAGAGUC.....                                                                                                                         | 5     |
| NGS-Star                  | .....AAAGACAUAGGAUAGAGUC.....                                                                                                                         | 4     |
| NGS-Star                  | .....AAAGACAUAGGAUAGAGUC.....                                                                                                                         | 4     |
| NGS-Star                  | .....AAAGACAUAGGAUAGAGUC.....                                                                                                                         | 4     |
| NGS-Star                  | .....AAAGACAUAGGAUAGAGUC.....                                                                                                                         | 3     |
| NGS-Star                  | .....AAAGACAUAGGAUAGAGUC.....                                                                                                                         | 3     |
| hsa-mir-942 MI0005767     | AUUAGGAGAUUCUCUCUGUUUUUGGCAUGUGUGUACUCACAGCCCCACACAUAGGCCGAAACAGAGAAGUUAUUUCCUAAU<br>(((((((.....(((((((.....)))))))))))))).....                      | 294   |
| hsa-miR-942 MIMAT0004985  | .....UCUUCUCUGUUUUUGGCAUGUG.....                                                                                                                      | 195   |
| NGS-Mature                | .....UCUUCUCUGUUUUUGGCAUGUG.....                                                                                                                      | 175   |
| NGS-Mature                | .....UCUUCUCUGUUUUUGGCAUGUG.....                                                                                                                      | 156   |
| NGS-Mature                | .....UCUUCUCUGUUUUUGGCAUGUG.....                                                                                                                      | 156   |





```

NGS-Star .....CUCUAGCCACAGAUGCAGUGAUU..... 8
NGS-Mature .....GCUGGAUCAGUGGUUCGAGU..... 5
NGS-Star .....CUAGCCACAGAUGCAGUGAU..... 3
NGS-Mature .....GCUGGAUCAGUGGUUCGAGUCU..... 1
NGS-Mature .....GCUGGAUCAGUGGUUCGA..... 1
NGS-Star .....CUCUAGCCACAGAUGCAGU..... 1

hsa-mir-1296 MI0003780 ACCUACCUAACUGGGUUAGGGCCUGGCUCUCCUUUAGGAAAACCUUCUGUGGGGAGUGGGGUUCGACCCUAACCCAGGUGGGCUGU
.(((((((.....(((((((.....(((((((.....(((((((.....(((((((.....(((((((.....(((((((.....(((((((.....
hsa-miR-1296 MIMAT0005794 .....UUAGGGCCUUGGCUCUCCU.....
NGS-Mature .....UUAGGGCCUUGGCUCUCCU..... 573
NGS-Mature .....UUAGGGCCUUGGCUCUCCU..... 201
NGS-Mature .....UUAGGGCCUUGGCUCUCCU..... 184
NGS-Star .....UUAGGGCCUUGGCUCUCCU.....AGUGGGGUUCGACCCUAACC..... 170
NGS-Mature .....UUAGGGCCUUGGCUCUCCU..... 162
NGS-Mature .....UUAGGGCCUUGGCUCUCCU..... 53
NGS-Mature .....UUAGGGCCUUGGCUCUCCU..... 53
NGS-Star .....UUAGGGCCUUGGCUCUCCU.....AGUGGGGUUCGACCCUAAC..... 46
NGS-Star .....UUAGGGCCUUGGCUCUCCU.....AGUGGGGUUCGACCCUAAC..... 29
NGS-Mature .....UUAGGGCCUUGGCUCUCCU..... 9
NGS-Mature .....UUAGGGCCUUGGCUCUCCU..... 9
NGS-Star .....UUAGGGCCUUGGCUCUCCU.....GGAGUGGGGUUCGACCCUAAC..... 7
NGS-Mature .....UUAGGGCCUUGGCUCUCCU..... 6
NGS-Mature .....UUAGGGCCUUGGCUCUCCU..... 6
NGS-Star .....UUAGGGCCUUGGCUCUCCU.....GAGUGGGGUUCGACCCUAAC..... 4
NGS-Star .....UUAGGGCCUUGGCUCUCCU.....GAGUGGGGUUCGACCCUAAC..... 2
NGS-Star .....UUAGGGCCUUGGCUCUCCU.....AGUGGGGUUCGACCCUAAC..... 2
NGS-Star .....UUAGGGCCUUGGCUCUCCU.....GUGGGGUUCGACCCUAAC..... 1
NGS-Star .....UUAGGGCCUUGGCUCUCCU.....GAGUGGGGUUCGACCCUAAC..... 1
NGS-Star .....UUAGGGCCUUGGCUCUCCU.....GUGGGGUUCGACCCUAAC..... 1

hsa-mir-181d MI0003139 GUCCCCUCCCCUAGGCCACAGCCGAGGUCACAAUAACAUAUCAUUGUUGUGCGGGGUGUUGAGGACUGAGGCCAGACCCACCGGGGAUGAAUGUCACUGUGCCUGGGCCAGACACGGCUAAAGGGGAUAGGGGAC
((((((((((((((((((((((((((((((((((((((((((((((((((((((((((((((((((((((((((((((((((((((((((((((((
hsa-miR-181d MIMAT0002821 .....AACAUUCAUUGUUGUCGGUGGU.....
NGS-Mature .....AACAUUCAUUGUUGUCGGUGGU..... 28143
NGS-Mature .....AACAUUCAUUGUUGUCGGUGGU..... 14791
NGS-Mature .....AACAUUCAUUGUUGUCGGUGGU..... 4555
NGS-Mature .....AACAUUCAUUGUUGUCGGUGGU..... 3192
NGS-Mature .....AACAUUCAUUGUUGUCGGUGGU..... 2254
NGS-Mature .....AACAUUCAUUGUUGUCGGUGGU..... 1034
NGS-Mature .....AACAUUCAUUGUUGUCGGUGGUUG..... 209
NGS-Mature .....AACAUUCAUUGUUGUCGGUGGU..... 135
NGS-Mature .....AACAUUCAUUGUUGUCGGUGGUUG..... 128

NGS-Mature .....AACAUUCAUUGUUGUCGG..... 106
NGS-Star .....AACAUUCAUUGUUGUCGG..... 42
NGS-Star .....AACAUUCAUUGUUGUCGG..... 13
NGS-Star .....AACAUUCAUUGUUGUCGG..... 2
NGS-Star .....AACAUUCAUUGUUGUCGG..... 2
NGS-Star .....AACAUUCAUUGUUGUCGG..... 2
NGS-Star .....AACAUUCAUUGUUGUCGG..... 2
NGS-Star .....AACAUUCAUUGUUGUCGG..... 1

hsa-mir-2110 MI0010629 CAGGGGUUUGGGGAAACGGCCGUGAGUGAGGCGUCGGCUGUUGUUCUACCCGGGUCUUUCCUCCACUCUUG
((((((((((((((((((((((((((((((((((((((((((((((((((((((((((((((((((((((((((((((((((((((((((((((((
hsa-miR-2110 MIMAT0010133 .....UUGGGGAAACGGCCGUGAGUG.....
NGS-Mature .....UUGGGGAAACGGCCGUGAGUG..... 3811
NGS-Mature .....UUGGGGAAACGGCCGUGAGUG..... 1434
NGS-Mature .....UUGGGGAAACGGCCGUGAGUGAG..... 959
NGS-Mature .....UUGGGGAAACGGCCGUGAGU..... 739
NGS-Mature .....UUGGGGAAACGGCCGUGAG..... 542
NGS-Mature .....UUGGGGAAACGGCCGUGA..... 125
NGS-Mature .....UUGGGGAAACGGCCGUGAGUGA..... 78
NGS-Mature .....UUGGGGAAACGGCCGUG..... 44
NGS-Mature .....UUGGGGAAACGGCCGUGAGUG..... 28
NGS-Star .....UUGGGGAAACGGCCGUGAGUG.....CACCGGGUCUUUCCUCCAC..... 27
NGS-Mature .....UUGGGGAAACGGCCGUGAGUGAG..... 21
NGS-Star .....UUGGGGAAACGGCCGUGAGUGAG.....UCACCGGGUCUUUCCUCCCA..... 15
NGS-Star .....UUGGGGAAACGGCCGUGAGUGAG.....CACCGGGUCUUUCCUCCCA..... 11
NGS-Star .....UUGGGGAAACGGCCGUGAGUGAG.....CACCGGGUCUUUCCUCCACU..... 5
NGS-Star .....UUGGGGAAACGGCCGUGAGUGAG.....UCACCGGGUCUUUCCUCCAC..... 4
NGS-Star .....UUGGGGAAACGGCCGUGAGUGAG.....CACCGGGUCUUUCCUCC..... 3
NGS-Star .....UUGGGGAAACGGCCGUGAGUGAG.....UCACCGGGUCUUUCCUCC..... 2
NGS-Star .....UUGGGGAAACGGCCGUGAGUGAG.....UCACCGGGUCUUUCCUC..... 1
NGS-Star .....UUGGGGAAACGGCCGUGAGUGAG.....UCACCGGGUCUUUCCUC..... 1
NGS-Star .....UUGGGGAAACGGCCGUGAGUGAG.....ACCGGGUCUUUCCUCCAC..... 1

hsa-mir-215 MI0000291 AUCAUUCAGAAAUGGUUAUACAGGAAAUGACCUAUGAAUUGACAGACAAUUAUGCUGAGUUUGUCUGUCAUUUCUUUAGGCCAAUUAUCUGUAUGACUGUGCUACUCAA
((((((((((((((((((((((((((((((((((((((((((((((((((((((((((((((((((((((((((((((((((((((((((((((((
hsa-miR-215 MIMAT0000272 .....AUGACCUAUGAAUUGACAGAC.....

```

|            |                                   |       |
|------------|-----------------------------------|-------|
| NGS-Mature | .....UGACCUAUGAAUUGACAG.....      | 45470 |
| NGS-Mature | .....AUGACCUAUGAAUUGACAGACA.....  | 1278  |
| NGS-Mature | .....UGACCUAUGAAUUGACAGACA.....   | 1261  |
| NGS-Mature | .....UGACCUAUGAAUUGACAGACA.....   | 684   |
| NGS-Mature | .....UGACCUAUGAAUUGACAGAC.....    | 527   |
| NGS-Mature | .....AUGACCUAUGAAUUGACAGAC.....   | 455   |
| NGS-Mature | .....AUGACCUAUGAAUUGACAG.....     | 188   |
| NGS-Mature | .....AUGACCUAUGAAUUGACAGA.....    | 134   |
| NGS-Mature | .....UGACCUAUGAAUUGACAGACAA.....  | 42    |
| NGS-Mature | .....AUGACCUAUGAAUUGACA.....      | 30    |
| NGS-Star   | .....UCUGUCAUUUCUUAGGCCAAUA.....  | 16    |
| NGS-Star   | .....UCUGUCAUUUCUUAGGCCAAU.....   | 3     |
| NGS-Star   | .....UCUGUCAUUUCUUAGGCCAAUAU..... | 1     |

|                           |                                                                                          |      |
|---------------------------|------------------------------------------------------------------------------------------|------|
| hsa-mir-450a-1 MI0001652  | AAACGAUACUAAACUGUUUUUGCGAUGUGUUCUAAUUGACACUAUAAAUAUUGGGAACAUUUUGCAUGUUAUAGUUUUGUAUCAUAUA |      |
| hsa-miR-450a MIMAT0001545 | .....UUUUGCGAUGUGUUCUAAUAU.....                                                          |      |
| NGS-Mature                | .....UUUUGCGAUGUGUUCUAAUAU.....                                                          | 2087 |
| NGS-Mature                | .....UUUUGCGAUGUGUUCUAAUAU.....                                                          | 700  |
| NGS-Mature                | .....UUUUGCGAUGUGUUCUAAUA.....                                                           | 650  |
| NGS-Mature                | .....UUUUGCGAUGUGUUCUAA.....                                                             | 420  |
| NGS-Star                  | .....AUUGGGAACAUUUUGCAUGUAU.....                                                         | 165  |
| NGS-Mature                | .....UUUUGCGAUGUGUUCUAA.....                                                             | 161  |
| NGS-Mature                | .....UUUUGCGAUGUGUUCUAAUAU.....                                                          | 37   |
| NGS-Mature                | .....UUUUGCGAUGUGUUCUAAUAUG.....                                                         | 30   |
| NGS-Star                  | .....AUUGGGAACAUUUUGCAUGUAU.....                                                         | 30   |
| NGS-Mature                | .....UUUGCGAUGUGUUCUAAUAU.....                                                           | 23   |
| NGS-Star                  | .....AUUGGGAACAUUUUGCAU.....                                                             | 20   |
| NGS-Star                  | .....AUUGGGAACAUUUUGCAUGUA.....                                                          | 16   |
| NGS-Mature                | .....UUUGCGAUGUGUUCUAAU.....                                                             | 14   |
| NGS-Star                  | .....AUUGGGAACAUUUUGCAUGU.....                                                           | 10   |
| NGS-Star                  | .....UAUUGGGAACAUUUUGCAU.....                                                            | 6    |
| NGS-Mature                | .....UUUGCGAUGUGUUCUAAUA.....                                                            | 6    |
| NGS-Star                  | .....AUUGGGAACAUUUUGCAUGU.....                                                           | 3    |
| NGS-Star                  | .....AUUGGGAACAUUUUGCAUG.....                                                            | 2    |
| NGS-Star                  | .....UAUUGGGAACAUUUUGCAUGU.....                                                          | 2    |
| NGS-Star                  | .....UAUUGGGAACAUUUUGCAUGUA.....                                                         | 2    |

|                          |                                                                                       |    |
|--------------------------|---------------------------------------------------------------------------------------|----|
| hsa-mir-663 MI0003672    | CCUUCGGCGUCCAGCGGGGGCCCGGGACC GCCCCUGUGUCUGGGCGGGGAUCCCGCGCCGUGUUUCCUGGUGGGCCGGCCAAUG |    |
| hsa-miR-663 MIMAT0003326 | .....AGGCGGGGGCCCGGGGACC.....                                                         |    |
| NGS-Mature               | .....CGGGCGCCCGGGGACGCC.....                                                          | 26 |
| NGS-Mature               | .....CGGGCGCCCGGGGACC.....                                                            | 18 |
| NGS-Star                 | .....CGGUGGGAUCCCGGGCC.....                                                           | 10 |
| NGS-Mature               | .....GGGCGCCCGGGGACGCCCCU.....                                                        | 9  |
| NGS-Mature               | .....GGGGGGCCCGGGGACC.....                                                            | 8  |
| NGS-Mature               | .....GGGCGCCCGGGGACGCCCCU.....                                                        | 8  |
| NGS-Mature               | .....CGGGCGCCCGGGGACC.....                                                            | 8  |
| NGS-Star                 | .....GGGUGGGAUCCCGGGCCGU.....                                                         | 7  |
| NGS-Mature               | .....CGGGCGCCCGGGGACCG.....                                                           | 5  |
| NGS-Mature               | .....GGGCGCCCGGGGACGCCCCU.....                                                        | 5  |
| NGS-Star                 | .....GGGUGGGAUCCCGGGCCG.....                                                          | 5  |
| NGS-Mature               | .....GGGGGGCCCGGGGACGCCCCU.....                                                       | 4  |
| NGS-Mature               | .....GGGGCGCCCGGGGACGCC.....                                                          | 4  |
| NGS-Star                 | .....GGGUGGGAUCCCGGGCCGUGUU.....                                                      | 4  |
| NGS-Star                 | .....UGGGAUCCCGGGCCGUG.....                                                           | 3  |
| NGS-Star                 | .....GGAUCCCGGGCCGUGUUUCCU.....                                                       | 3  |
| NGS-Star                 | .....UGGCGGUGGGAUCCCGGGCC.....                                                        | 3  |
| NGS-Star                 | .....UGGCGGUGGGAUCCCGGG.....                                                          | 3  |
| NGS-Star                 | .....GUGGGAUCCCGGGCCGUGUU.....                                                        | 3  |
| NGS-Star                 | .....GUGGCGGUGGGAUCCCGGGCC.....                                                       | 3  |

|                            |                                                                               |     |
|----------------------------|-------------------------------------------------------------------------------|-----|
| hsa-mir-1273c MI0014171    | UGCAGCCUGGGCGACAAAACGAGACCCUGUCUUUUUUUUUUUCUGAGACAGAGUCUCGUUCUGUUGCCCAAGCUGGA |     |
| hsa-miR-1273c MIMAT0015017 | .....GGCGACAAAACGAGACCCUGUC.....                                              |     |
| NGS-Mature                 | .....GGCGACAAAACGAGACCCUGU.....                                               | 254 |
| NGS-Mature                 | .....GGCGACAAAACGAGACCCUGUC.....                                              | 82  |
| NGS-Mature                 | .....GGCGACAAAACGAGACCC.....                                                  | 82  |
| NGS-Mature                 | .....GGCGACAAAACGAGACCCU.....                                                 | 64  |
| NGS-Mature                 | .....GGCGACAAAACGAGACCCUG.....                                                | 60  |
| NGS-Star                   | .....CAGAGUCUCGUUCUGUUGCCAA.....                                              | 21  |
| NGS-Mature                 | .....GGCGACAAAACGAGACCCUGUC.....                                              | 20  |
| NGS-Star                   | .....CAGAGUCUCGUUCUGUUGCCAA.....                                              | 15  |
| NGS-Star                   | .....CAGAGUCUCGUUCUGUUGCC.....                                                | 8   |
| NGS-Star                   | .....CAGAGUCUCGUUCUGUUGCC.....                                                | 8   |
| NGS-Star                   | .....CAGAGUCUCGUUCUGUUGC.....                                                 | 8   |
| NGS-Star                   | .....AGAGUCUCGUUCUGUUGCCAA.....                                               | 3   |
| NGS-Mature                 | .....CGACAAAACGAGACCCUGUCU.....                                               | 3   |
| NGS-Star                   | .....ACAGAGUCUCGUUCUGUUGC.....                                                | 3   |
| NGS-Mature                 | .....GACAAAACGAGACCCUGU.....                                                  | 3   |

```

NGS-Star .....CAGAGUCUCGUUCUGUUGCCCAAG..... 2
NGS-Star .....GAGUCUCGUUCUGUUGCCCAA..... 2
NGS-Mature .....CGCACAAAACGAGACCCUG..... 2
NGS-Star .....GAGUCUCGUUCUGUUGCCCAAG..... 1
NGS-Mature .....CGCACAAAACGAGACCCUGUC..... 1

hsa-mir-1292 MI0006433 CCUGGGAACGGGUUCCGGCAGACGCUAGGUUUGCGUUGACGUCGCGCCCCGGCUCCGUUCCAGG
((((((((((((((((((((((((((((((((((((((((((((((((((((((((((((((((((((
hsa-miR-1292 MIMAT0005943 ..UGGGAACGGGUUCCGGCAGACGCU.....
..UGGGAACGGGUUCCGGCAGACGCU..... 140
NGS-Mature ..UGGGAACGGGUUCCGGCAGACGCU..... 122
NGS-Mature ..UGGGAACGGGUUCCGGCAGACGCUA..... 97
NGS-Mature ..GAACGGGUUCCGGCAGACGCUA..... 80
NGS-Mature ..UGGGAACGGGUUCCGGCAGACGCU..... 58
NGS-Mature ..GGGAACGGGUUCCGGCAGACGCUA..... 51
NGS-Mature ..GGGAACGGGUUCCGGCAGACGCU..... 27
NGS-Mature ..GGGAACGGGUUCCGGCAGACGCU..... 25
NGS-Mature ..UGGGAACGGGUUCCGGCAGACG..... 21
NGS-Mature ..AACGGGUUCCGGCAGACGCUAG..... 19
NGS-Star .....UCGCGCCCCGGCUCCGUUC..... 3

hsa-mir-1908 MI0008329 CGGGAUCCGCGGGGGGACGGCGAUUGGUCCGUUUGUGUGGCCACCGGCCCGCCGCGCCCGCCCGCCCGCC
((((((((((((((((((((((((((((((((((((((((((((((((((((((((((((((((((((
hsa-miR-1908 MIMAT0007881 .....CGGCGGGGACGGCGAUUGGUC.....
.....CGGCGGGGACGGCGAUUGGUC..... 332
NGS-Mature .....CGGCGGGGACGGCGAUUGGUC..... 132
NGS-Mature .....CGGCGGGGACGGCGAUUGGUC..... 69
NGS-Mature .....CGGCGGGGACGGCGAUUG..... 9
NGS-Star .....ACCGGCCCGCGGCUCCGCC..... 8
NGS-Star .....ACCGGCCCGCGGCUCCGCC..... 8
NGS-Mature .....CGGCGGGGACGGCGAUUGGUC..... 7
NGS-Star .....CCGGCCCGCGGCUCCGCC..... 5
NGS-Mature .....GGCGGGGACGGCGAUUGGUC..... 3
NGS-Mature .....CGGCGGGGACGGCGAUUGGUC..... 3
NGS-Star .....ACCGGCCCGCGGCUCCGCC..... 2
NGS-Star .....CGGCGCGCGGCUCCGCCCGGC..... 2
NGS-Mature .....GGCGGGGACGGCGAUUGGUC..... 2
NGS-Mature .....CGGCGGGGACGGCGAUUG..... 1
NGS-Star .....CCGGCCCGCGGCUCCGCC..... 1
NGS-Star .....CCGGCCCGCGGCUCCGCC..... 1
NGS-Star .....GGCGCGCGGCUCCGCCCGGC..... 1
NGS-Mature .....GGCGGGGACGGCGAUUGG..... 1
NGS-Star .....CGGCGCGCGGCUCCGCC..... 1
NGS-Star .....ACCGGCCCGCGGCUCCGC..... 1

hsa-mir-190b MI0005545 UGCUUCUGUGUGAUUUGUUAUUGGGUUGUUAAUUAGGAACCAACUAAUUGUCAAAACAUUUCUACAGCAGCAG
((((((((((((((((((((((((((((((((((((((((((((((((((((((((((((((((((((
hsa-miR-190b MIMAT0004929 .....UGAUUUGUUGAUUUGGGUUG.....
.....UGAUUUGUUGAUUUGGGUUG..... 316
NGS-Mature .....UGAUUUGUUGAUUUGGGUUG..... 226
NGS-Mature .....UGAUUUGUUGAUUUGGGUUG..... 22
NGS-Mature .....UGAUUUGUUGAUUUGGGU..... 15
NGS-Mature .....UGAUUUGUUGAUUUGGGUUG..... 4
NGS-Mature .....GAUUAUGUUGAUUUGGGUUG..... 2
NGS-Mature .....UGAUUUGUUGAUUUGG..... 1
NGS-Star .....ACUAAUUGUCAAAACAUUUCU..... 1
NGS-Mature .....UGAUUUGUUGAUUUGGGU..... 1
NGS-Mature .....GAUUAUGUUGAUUUGGGUUG..... 1

hsa-mir-204 MI0000284 GGCUCACAGUCUUCUUCUUGUAGACUCUGGACUUCUCCUUUGUCAUCCUAGCCUGAGAAUAUUGAAGGAGGCUGGGAAGGCAAAGGGACGUUCAUUGUCAUCACUGGC
((((((((((((((((((((((((((((((((((((((((((((((((((((((((((((((((((((
hsa-miR-204 MIMAT0000265 .....UUCUUUUGUCAUCCUAGCCU.....
.....UUCUUUUGUCAUCCUAGCCU..... 9380
NGS-Mature .....UUCUUUUGUCAUCCUAGCCU..... 1639
NGS-Mature .....UUCUUUUGUCAUCCUAGCCUG..... 718
NGS-Star .....GCUGGGAAGGCAAAGGGACGU..... 576
NGS-Mature .....UUCUUUUGUCAUCCUAG..... 429
NGS-Mature .....UUCUUUUGUCAUCCUAGC..... 402
NGS-Mature .....UUCUUUUGUCAUCCUAG..... 213
NGS-Mature .....UCUUCAUGUGACUCUGGGAC..... 130
NGS-Mature .....CUUCAUGUGACUCUGGGAC..... 114
NGS-Mature .....UCCUUUGUCAUCCUAGCCU..... 110
NGS-Star .....GCUGGGAAGGCAAAGGGACG..... 86
NGS-Mature .....UUCUUUUGUCAUCCUAGCCUGA..... 82
NGS-Star .....GCUGGGAAGGCAAAGGGA..... 50
NGS-Star .....GCUGGGAAGGCAAAGGGAC..... 42
NGS-Star .....GCUGGGAAGGCAAAGGGACGU..... 37
NGS-Star .....GCUGGGAAGGCAAAGGGACGU..... 31
NGS-Star .....GCUGGGAAGGCAAAGGGACGUUC..... 5
NGS-Star .....GAGGCUUGGGAAGGCAAAGGGACGU..... 5

```





NGS-Mature 77
NGS-Mature 59
NGS-Star 56
NGS-Mature 45
NGS-Mature 41
NGS-Mature 30
NGS-Star 14
NGS-Star 8
NGS-Star 5
NGS-Star 4
NGS-Star 4
NGS-Star 2
NGS-Star 2
hsa-mir-548k MI0006354
hsa-miR-548k MIMAT0005882
NGS-Mature 3413
NGS-Mature 590
NGS-Mature 284
NGS-Mature 244
NGS-Mature 52
NGS-Mature 47
NGS-Star 24
NGS-Mature 20
NGS-Mature 18
NGS-Mature 15
NGS-Star 7
NGS-Mature 6
NGS-Star 2
NGS-Star 1
NGS-Star 1
NGS-Star 1
hsa-mir-548n MI0006399
hsa-miR-548n MIMAT0005916
NGS-Mature 170
NGS-Mature 57
NGS-Mature 46
NGS-Mature 31
NGS-Mature 28
NGS-Star 16
NGS-Star 16
NGS-Star 13
NGS-Mature 12
NGS-Mature 11
NGS-Star 11
NGS-Star 10
NGS-Mature 9
NGS-Mature 9
NGS-Star 6
NGS-Star 5
NGS-Mature 5
NGS-Star 3
NGS-Star 2
NGS-Star 1
hsa-mir-577 MI0003584
hsa-miR-577 MIMAT0003242
NGS-Mature 1244
NGS-Mature 120
NGS-Mature 80
NGS-Mature 70
NGS-Mature 64
NGS-Mature 47
NGS-Mature 30
NGS-Star 30
NGS-Star 25
NGS-Mature 21
NGS-Mature 14
NGS-Mature 9
NGS-Star 8
NGS-Star 3
NGS-Star 2
NGS-Star 2
NGS-Star 2
NGS-Star 1







```

hsa-mir-3164 MI0014194 CUUGGAAACUGUGACUUUAAGGGAAUUGGGCCAGCAGCAGCCUCCAGCAAUCUGCCUUUUGUCUUAAGUCGCAGUUUCCAGG
(((.((((((((((((((((((((((((((((((((((((((((((((((((((((((((((((((((((((((((((((((((((((((((((((((((
hsa-miR-3164 MIMAT0015038 . . . . .UGUGACUUUAAGGAAAUGGCC . . . . . 519
NGS-Mature . . . . .UGUGACUUUAAGGAAAUGGCC . . . . . 16
NGS-Mature . . . . .UGUGACUUUAAGGAAAUGG . . . . . 6
NGS-Mature . . . . .UGUGACUUUAAGGAAAUG . . . . . 3
NGS-Mature . . . . .UGUGACUUUAAGGAAAUGGC . . . . . 2
NGS-Mature . . . . .GUGACUUUAAGGAAAUGG . . . . . 2
NGS-Mature . . . . .CUGUGACUUUAAGGAAAUGGC . . . . . 2
NGS-Mature . . . . .CUGUGACUUUAAGGAAAUGGCC . . . . . 2
NGS-Star . . . . .CUGUGACUUUAAGGAAAUGGCC . . . . . 2
NGS-Mature . . . . .UGUGACUUUAAGGAAAUGGCCG . . . . . 2
NGS-Mature . . . . .GUGACUUUAAGGAAAUGGCC . . . . . 1
NGS-Mature . . . . .UGUGACUUUAAGGAAAUGGCCACA . . . . . 1
NGS-Star . . . . .CCGUUUUGCUUGAAGUCGAGU . . . . . 1

hsa-mir-3174 MI0014208 GUUACCUGGUAGUGAGUUAAGAGAUGCAGAGCCUCCAGCAAUCUGGAUCUGCAUUUUAAUUCACAUCAUGCAUGGUAAU
((((((((((((((((((((((((((((((((((((((((((((((((((((((((((((((((((((((((((((((((((((((((((((((((
hsa-miR-3174 MIMAT0015051 . . . . .UAGUGAGUUAGAGAUGCAGAGCC . . . . . 75
NGS-Mature . . . . .UAGUGAGUUAGAGAUGCAG . . . . . 70
NGS-Mature . . . . .UAGUGAGUUAGAGAUGCAGGC . . . . . 49
NGS-Mature . . . . .UAGUGAGUUAGAGAUGCAG . . . . . 44
NGS-Mature . . . . .UAGUGAGUUAGAGAUGCAGAGCC . . . . . 41
NGS-Mature . . . . .UAGUGAGUUAGAGAUGCAGAGCC . . . . . 13
NGS-Mature . . . . .UAGUGAGUUAGAGAUGCAG . . . . . 8
NGS-Star . . . . .UAGUGAGUUAGAGAUGCAG . . . . . 3
NGS-Mature . . . . .UAGUGAGUUAGAGAUGCAGAGCCU . . . . . 3
NGS-Mature . . . . .GUGAGUUAGAGAUGCAG . . . . . 1
NGS-Mature . . . . .AGUGAGUUAGAGAUGCAGAGCC . . . . . 1
NGS-Star . . . . .UAGUGAGUUAGAGAUGCAG . . . . . 1
NGS-Star . . . . .AUCUGCAUUUUAAUUCACAU . . . . . 1
NGS-Star . . . . .GAUCUGCAUUUUAAUUCACAU . . . . . 1

hsa-mir-539 MI0003514 AUACUUGAGGAGAAAUAUCCUUGGUGUGUCGUUUUAUUAUGAUAAUCAUAACAAGGACAAUUUCUUUUUGAGUAU
((((((((((((((((((((((((((((((((((((((((((((((((((((((((((((((((((((((((((((((((((((((((((((((((
hsa-miR-539 MIMAT0003163 . . . . .GGAGAAAUAUCCUUGGUGUGU . . . . . 48202
NGS-Star . . . . .AUCAUACAAGGACAAUUUCUUU . . . . . 17251
NGS-Star . . . . .AUACAAGGACAAUUUCUUUU . . . . . 9627
NGS-Star . . . . .CAUACAAGGACAAUUUCUUUU . . . . . 3513
NGS-Star . . . . .AUCAUACAAGGACAAUUUCUU . . . . . 3052
NGS-Star . . . . .AUCAUACAAGGACAAUUUCUUUU . . . . . 2170
NGS-Star . . . . .AUACAAGGACAAUUUCUUUU . . . . . 2012
NGS-Star . . . . .AAUCAUACAAGGACAAUUUCUUU . . . . . 1042
NGS-Star . . . . .AUACAAGGACAAUUUCUUUU . . . . . 847
NGS-Star . . . . .CAUACAAGGACAAUUUCUUUU . . . . . 612
NGS-Mature . . . . .GGAGAAAUAUCCUUGGUGUGU . . . . . 250
NGS-Mature . . . . .GGAGAAAUAUCCUUGGUGUGU . . . . . 222

NGS-Mature . . . . .AGAAAUAUCCUUGGUGUGU . . . . . 64
NGS-Mature . . . . .AAUUAUCCUUGGUGUGU . . . . . 33
NGS-Mature . . . . .AAUUAUCCUUGGUGUGU . . . . . 19
NGS-Mature . . . . .AGAAAUAUCCUUGGUGUGU . . . . . 14
NGS-Mature . . . . .GGAGAAAUAUCCUUGGUGUG . . . . . 11
NGS-Mature . . . . .AGAAAUAUCCUUGGUGUGU . . . . . 8
NGS-Mature . . . . .GGAGAAAUAUCCUUGGUGU . . . . . 7
NGS-Mature . . . . .GGAGAAAUAUCCUUGGUG . . . . . 7

hsa-mir-5481 MI0006361 UAUUAGGUUGGUGCAAAGUAUUUGCGGGUUUUGUCGUAAGAAAGUAUUGGCAAAACUGCAGUUACUUGGCACCAACCAAUUGCU
((((((((((((((((((((((((((((((((((((((((((((((((((((((((((((((((((((((((((((((((((((((((((((((((
hsa-miR-5481 MIMAT0005889 . . . . .AAAAGUAUUUGCGGGUUUUGUC . . . . . 293
NGS-Mature . . . . .AAAAGUAUUUGCGGGUUUUGUC . . . . . 243
NGS-Mature . . . . .AAAAGUAUUUGCGGGUUUUG . . . . . 74
NGS-Mature . . . . .AAAAGUAUUUGCGGGUUUUGCGUA . . . . . 52
NGS-Mature . . . . .AAAAGUAUUUGCGGGUUUU . . . . . 38
NGS-Star . . . . .AAAAGUAUUUGCGGGUUUU . . . . . 6
NGS-Star . . . . .AAAAGUAUUUGCGGGUUUU . . . . . 5
NGS-Mature . . . . .AAAAGUAUUUGCGGGUUU . . . . . 3
NGS-Mature . . . . .AAAAGUAUUUGCGGGUUUUGU . . . . . 3
NGS-Mature . . . . .AAAAGUAUUUGCGGGUUUUGU . . . . . 1
NGS-Star . . . . .AAAAGUAUUUGCGGGUUUUGU . . . . . 1
NGS-Mature . . . . .AAAAGUAUUUGCGGGUUUUGUC . . . . . 1
NGS-Mature . . . . .AUUAGGUUGGUGCAA . . . . . 1
NGS-Star . . . . .AUUAGGUUGGUGCAA . . . . . 1
NGS-Star . . . . .GGCAAAACUGCAGUUAU . . . . . 1

hsa-mir-548w MI0014222 GGUUGGUGCAAAGUAUACUGCGGGUUUUGCCUUUAACAUAUUGGCAAAACCCCAAUUACUUUUGCCACCAUUC
((((((((((((((((((((((((((((((((((((((((((((((((((((((((((((((((((((((((((((((((((((((((((((((((
hsa-miR-548w MIMAT0015060 . . . . .AAAAGUAACUGCGGGUUUUGCCU . . . . .

```



```

NGS-Star .....GAAACUGAGGAUUAGGAAGGU... 1
NGS-Star .....ACAACAGUGCCAACCUCACAG..... 1

hsa-mir-3129 MI0014146
GUACUUGGGCAGUAGUGAGAGAUUGGUUUGCCUGUUAUGAAUUAACUAAUCUCACACUGCGCCCAAGGC
...((((((((((((((((((((((((((((((((((((((((((((((((((((((((((((((((((((
NGS-Mature .....GCAGUAGUGUAGAGAUUGGUUU..... 103
NGS-Mature .....AGUAGUGUAGAGAUUGGUUUGC..... 75
NGS-Mature .....AGUAGUGUAGAGAUUGGUUUG..... 73
NGS-Mature .....CAGUAGUGUAGAGAUUGGUUU..... 40
NGS-Mature .....CAGUAGUGUAGAGAUUGGUUU..... 15
NGS-Mature .....AGUAGUGUAGAGAUUGGUUU..... 14
NGS-Mature .....GCAGUAGUGUAGAGAUUGGUUU..... 13
NGS-Star .....AAACUAAUCUCUACACUGCGUC..... 6
NGS-Mature .....GCAGUAGUGUAGAGAUUGGU..... 4
NGS-Star .....AAACUAAUCUCUACACUGCGUC..... 3
NGS-Mature .....CAGUAGUGUAGAGAUUGGUU..... 3
NGS-Mature .....GCAGUAGUGUAGAGAUUGGUUUG..... 2
NGS-Star .....AACUAAUCUCUACACUGCGGCC..... 1
NGS-Star .....AACUAAUCUCUACACUGCGCC..... 1
NGS-Star .....CUAAUCUCUACACUGCGUC..... 1
NGS-Star .....CUAAUCUCUACACUGCGCC..... 1
NGS-Star .....AACUAAUCUCUACACUGCGUC..... 1
NGS-Star .....AAACUAAUCUCUACACUGCU..... 1
NGS-Star .....AAACUAAUCUCUACACUG..... 1

hsa-mir-3127 MI0014144
GGCCAGGCCCAUCAGGGCUUGUGGAAUUGGGAAGGAGAGAGGACGCCUUCUCCUUCUGCAGGCCUGCGGGUGUGGU
((((((((((((((((((((((((((((((((((((((((((((((((((((((((((((((((((((
hsa-miR-3127 MIMAT0014990
.....AUCAGGGCUUGUGGAAUUGGGAAG..... 467
NGS-Mature .....AUCAGGGCUUGUGGAAUUGGGAAG..... 194
NGS-Mature .....AUCAGGGCUUGUGGAAUUGGGA..... 63
NGS-Mature .....AUCAGGGCUUGUGGAAUUGGGAAG..... 17
NGS-Mature .....UCAGGGCUUGUGGAAUUGGGAAG..... 15
NGS-Star .....UCCCUUCUGCAGGCCUGCGUG..... 9
NGS-Mature .....AUCAGGGCUUGUGGAAUUGG..... 7
NGS-Mature .....AUCAGGGCUUGUGGAAUUGGG..... 6
NGS-Mature .....CAUCAGGGCUUGUGGAAUUGGGA..... 5
NGS-Mature .....AGGGCUUGUGGAAUUGGGAAG..... 3
NGS-Mature .....AUCAGGGCUUGUGGAAUUGGGAAGGA..... 3
NGS-Star .....UCCCUUCUGCAGGCCUGCU..... 3
NGS-Star .....UCCCUUCUGCAGGCCUGCUG..... 2
NGS-Star .....UCCCUUCUGCAGGCCUGC..... 1
NGS-Star .....UCCCUUCUGCAGGCCUGCU..... 1

hsa-mir-3194 MI0014239
AGGUGGCAGGGCCAGCCACCAGGAGGGCGUGGCCACCCGGGCAGCUCUGCUCACUGGCAGUGUCACCU
((((((((((((((((((((((((((((((((((((((((((((((((((((((((((((((((((((
hsa-miR-3194 MIMAT0015078
.....GGCCAGCCACCAGGAGGGCUG..... 36
NGS-Mature .....GGCCAGCCACCAGGAGGGCUGC..... 26
NGS-Star .....AGCUCUGCUGCUCACUGGCAGU..... 12
NGS-Mature .....GGCCAGCCACCAGGAGGGCUG..... 10
NGS-Star .....AGCUCUGCUGCUCACUGGCA..... 9
NGS-Mature .....GGCCAGCCACCAGGAGGG..... 9
NGS-Mature .....GGCCAGCCACCAGGAGGGCU..... 6
NGS-Mature .....GGAGGGCUGCGGCCACCCGGGCAGCUCUGCUG..... 4
NGS-Star .....AGCUCUGCUGCUCACUGGCAG..... 3
NGS-Star .....AGCUCUGCUGCUCACUGGCAGU..... 1
NGS-Star .....AGCUCUGCUGCUCACUGG..... 1
NGS-Mature .....GGCCAGCCACCAGGAGGGC..... 1

hsa-mir-1179 MI0006272
GGCUGGAAAGGAAGAAGCAUUCUUUCAUUGGUUGGUUGUGUAUUGCCUUGUCAACCAAUAAGAGGAUGCCAUUUUACCUUUUCUGACUAGCU
((((((((((((((((((((((((((((((((((((((((((((((((((((((((((((((((((((
hsa-miR-1179 MIMAT0005824
.....AAGCAUUCUUUCAUUGGUUGG..... 317
NGS-Mature .....AAGCAUUCUUUCAUUGGUUGG..... 39
NGS-Mature .....AGAAGCAUUCUUUCAUUGGUUG..... 26
NGS-Mature .....AAGCAUUCUUUCAUUGGUUGG..... 16
NGS-Mature .....AGAAGCAUUCUUUCAUUGGUU..... 11
NGS-Star .....AAGCAUUCUUUCAUUGGUU..... 8
NGS-Mature .....AAGCAUUCUUUCAUUGGU..... 6
NGS-Star .....CAACCAAUAAGAGGAUGCCAUU..... 3
NGS-Star .....ACCAAUAAGAGGAUGCCAUU..... 3
NGS-Mature .....AUUCUUUCAUUGGUUGGU..... 3
NGS-Mature .....AGCAUUCUUUCAUUGGUUGGU..... 3
NGS-Star .....CAACCAAUAAGAGGAUGCCAUU..... 2
NGS-Mature .....AAGCAUUCUUUCAUUGGUUG..... 2
NGS-Star .....AAGCAUUCUUUCAUUGGUUG..... 2
NGS-Mature .....GAAGCAUUCUUUCAUUGGUU..... 2
NGS-Star .....AAGCAUUCUUUCAUUGGUUG..... 1
NGS-Star .....ACCAAUAAGAGGAUGCCAUU..... 1
NGS-Star .....ACCAAUAAGAGGAUGCCAUUUU..... 1

```



|                           |                                                                                                   |     |
|---------------------------|---------------------------------------------------------------------------------------------------|-----|
| NGS-Star                  | .....GAAUGUGUAGCAAAGACAGA.....                                                                    | 15  |
| NGS-Star                  | .....GAAUGUGUAGCAAAGACAGAA.....                                                                   | 12  |
| NGS-Star                  | .....UGAAUGUGUAGCAAAGACAG.....                                                                    | 10  |
| NGS-Mature                | .....GUGUCUUUUGUCUCUGCAGUCAGU.....                                                                | 8   |
| NGS-Star                  | .....AUGUGUAGCAAAGACAGAAU.....                                                                    | 7   |
| NGS-Mature                | .....GUGUCUUUUGUCUCUGCAGUCAG.....                                                                 | 6   |
| NGS-Mature                | .....CGUGUCUUUUGUCUCUGCAGUC.....                                                                  | 3   |
| NGS-Mature                | .....GUGUCUUUUGUCUCUGCAGUC.....                                                                   | 3   |
| NGS-Mature                | .....GUGUCUUUUGUCUCUGCAGU.....                                                                    | 2   |
| NGS-Mature                | .....GUGUCUUUUGUCUCUGCAG.....                                                                     | 1   |
| hsa-mir-548h-1 MI0006411  | UCUGUCCAUUAGGUGGUGCAAAGUAUAUCGCGUUUUUGUCAUUUUUAUGGUAAAAACUGGAAUUUUUUUUCACUUGACCUAAUUAUUAAGCCAGAAU |     |
| hsa-miR-548h MIMAT0005928 | (((((.....)))))).....                                                                             |     |
| NGS-Mature                | .....AAAAGUAAUCGCGUUUUUGUC.....                                                                   | 378 |
| NGS-Mature                | .....AAAAGUAAUCGCGUUUUUGUC.....                                                                   | 190 |
| NGS-Mature                | .....AAAAGUAAUCGCGUUUUUGUCA.....                                                                  | 61  |
| NGS-Mature                | .....AAAAGUAAUCGCGUUUUUG.....                                                                     | 33  |
| NGS-Mature                | .....CAAAGUAAUCGCGUUUUUG.....                                                                     | 30  |
| NGS-Mature                | .....AAAAGUAAUCGCGUUUUU.....                                                                      | 17  |
| NGS-Mature                | .....AAGUAAUCGCGUUUUUG.....                                                                       | 10  |
| NGS-Mature                | .....CAAAGUAAUCGCGUUUUUG.....                                                                     | 7   |
| NGS-Mature                | .....AAGUAAUCGCGUUUUUGUC.....                                                                     | 5   |
| NGS-Mature                | .....AAGUAAUCGCGUUUUUGUCA.....                                                                    | 4   |
| NGS-Star                  | .....AAAACUGGAAUUUCUUUGCA.....                                                                    | 1   |
| NGS-Star                  | .....AAAACUGGAAUUUCUUUU.....                                                                      | 1   |
| NGS-Star                  | .....AAAACUGGAAUUUCUUU.....                                                                       | 1   |
| hsa-mir-642a MI0003657    | AUCUGAGUUGGAGGGGCCUCUCAAAUGUGUCUUGGGUGGGGAUCAAGACACAUUUGGAGAGGGAACUCCCAACUCGGCCUCUGCCAUCUU        |     |
| hsa-miR-642a MIMAT0003312 | (((((.....)))))).....                                                                             |     |
| NGS-Star                  | .....GUCCUCUCAAAUGUGUCUUG.....                                                                    | 519 |
| NGS-Star                  | .....AGACACAUUUGGAGAGGGAAC.....                                                                   | 139 |
| NGS-Star                  | .....AGACACAUUUGGAGAGGGAAC.....                                                                   | 61  |
| NGS-Star                  | .....AGACACAUUUGGAGAGGGAACCU.....                                                                 | 53  |
| NGS-Mature                | .....GUCCUCUCAAAUGUGUCUUG.....                                                                    | 40  |
| NGS-Star                  | .....AGACACAUUUGGAGAGGGA.....                                                                     | 26  |
| NGS-Star                  | .....AGACACAUUUGGAGAGGG.....                                                                      | 22  |
| NGS-Mature                | .....GUCCUCUCAAAUGUGUCUU.....                                                                     | 12  |
| NGS-Star                  | .....GACACAUUUGGAGAGGGAAC.....                                                                    | 7   |
| NGS-Star                  | .....GACACAUUUGGAGAGGGAACCU.....                                                                  | 6   |
| NGS-Mature                | .....GUCCUCUCAAAUGUGUCU.....                                                                      | 6   |
| NGS-Star                  | .....ACACAUUUGGAGAGGGAACCU.....                                                                   | 3   |
| NGS-Star                  | .....GACACAUUUGGAGAGGGA.....                                                                      | 2   |
| NGS-Mature                | .....GUCCUCUCAAAUGUGU.....                                                                        | 2   |
| NGS-Mature                | .....GUCCUCUCAAAUGUGUC.....                                                                       | 1   |
| NGS-Mature                | .....GGUCCUCUCAAAUGUGU.....                                                                       | 1   |
| hsa-mir-1293 MI0006355    | AGGUUGUUCUGGGUGGUCUGGAGAUUUGUGCAGCUUGUACCGCACAAAUCUCCGGACCACUUAGUCUUUA                            |     |
| hsa-miR-1293 MIMAT0005883 | (((((.....)))))).....                                                                             |     |
| NGS-Mature                | .....UGGGUGGUCUGGAGAUUUGUC.....                                                                   | 96  |
| NGS-Mature                | .....UCUGGGUGGUCUGGAGAUUUGUG.....                                                                 | 65  |
| NGS-Mature                | .....GGGUGGUCUGGAGAUUUGUCA.....                                                                   | 31  |
| NGS-Mature                | .....CUGGGUGGUCUGGAGAUUUGUG.....                                                                  | 27  |
| NGS-Mature                | .....UGGGUGGUCUGGAGAUUUGUC.....                                                                   | 26  |
| NGS-Mature                | .....UCUGGAGAUUUGUGCAGCUUGU.....                                                                  | 23  |
| NGS-Mature                | .....GGUGGUCUGGAGAUUUGUCA.....                                                                    | 17  |
| NGS-Mature                | .....UGGGUGGUCUGGAGAUUUGUCA.....                                                                  | 15  |
| NGS-Mature                | .....UCUGGAGAUUUGUGCAGCUUGU.....                                                                  | 13  |
| NGS-Star                  | .....ACAAAUCUCCGGACCACUAGU.....                                                                   | 12  |
| NGS-Mature                | .....GUGGUCUGGAGAUUUGUCAG.....                                                                    | 12  |
| NGS-Star                  | .....CAAAUCUCCGGACCACUAGUCU.....                                                                  | 8   |
| NGS-Star                  | .....CAAAUCUCCGGACCACUAGUC.....                                                                   | 6   |
| NGS-Star                  | .....CAAAUCUCCGGACCACUAGU.....                                                                    | 5   |
| NGS-Star                  | .....AAUCUCCGGACCACUAGUCU.....                                                                    | 2   |
| NGS-Star                  | .....CACAAAUCUCCGGACCACUU.....                                                                    | 2   |
| NGS-Star                  | .....CAAAAUCUCCGGACCACUAG.....                                                                    | 1   |
| NGS-Star                  | .....GCACAAAUCUCCGGACCACUU.....                                                                   | 1   |
| NGS-Star                  | .....CACAAAUCUCCGGACCACU.....                                                                     | 1   |
| NGS-Star                  | .....ACAAAUCUCCGGACCACUAGUC.....                                                                  | 1   |
| hsa-mir-1276 MI0006416    | CCCCAGCUAGGUAAGGCCUCUGGAGACACCUGGAUUUCAGAGAAUGUCUCCACUGAGCACUUGGGCCUUGAUGGGCGGU                   |     |
| hsa-miR-1276 MIMAT0005930 | (((((.....)))))).....                                                                             |     |
| NGS-Mature                | .....UAAAGAGCCUCUGGAGACA.....                                                                     | 288 |
| NGS-Mature                | .....UAAAGAGCCUCUGGAGACAC.....                                                                    | 130 |
| NGS-Mature                | .....UAAAGAGCCUCUGGAGACAC.....                                                                    | 51  |
| NGS-Mature                | .....UAAAGAGCCUCUGGAGAC.....                                                                      | 24  |
| NGS-Mature                | .....UAAAGAGCCUCUGGAGACACU.....                                                                   | 5   |

```

NGS-Mature      .....UAAAGAGCCUCUGGAGACACCCUG..... 4
NGS-Star        .....UGUCUCCACUGAGCACUUGGGC..... 3
NGS-Star        .....UCUCCACUGAGCACUUGGGC..... 3
NGS-Mature      .....UAAAGAGCCUCUGGAGA..... 2
NGS-Star        .....UCUCCACUGAGCACUUGGGC..... 2
NGS-Star        .....UCUCCACUGAGCACUUGGGCU..... 2
NGS-Mature      .....AAAGAGCCUCUGGAGACAC..... 1
NGS-Mature      .....AAAGAGCCUCUGGAGACAC..... 1
NGS-Mature      .....AAAGAGCCUCUGGAGACA..... 1

hsa-mir-939 MI0005761 UGUGGGCAGGGCCUCUGGGAGCUGAGGCUCUGGGGUGGGCGGGCUGACCCUGGGCCUCUGCCCCAGUGUCUGACCGC
((((((((((((((((((((((((((((((((((((((((((((((((((((((((((((((((((((((((((((((((((((
((((((((((((((((((((((((((((((((((((((((((((((((((((((((((((((((((((((((((((((((((((
.UGGGGAGCUGAGGCUCUGGGGUG..... 112
NGS-Star        .....CCUUGGGCCUCUGCUCUCCAGU..... 112
NGS-Mature      .....UGGGGAGCUGAGGCUCUGGGGUG..... 25
NGS-Star        .....CCUUGGGCCUCUGCUCUCCAG..... 16
NGS-Mature      .....UGGGGAGCUGAGGCUCUGGGGU..... 6
NGS-Star        .....CUGGGCCUCUGCUCUCCAGU..... 5
NGS-Mature      .....CCUGGGGAGCUGAGGCUCUGGG..... 3
NGS-Mature      .....CCUUGGGGAGCUGAGGCUCUGGG..... 3
NGS-Mature      .....CCUGGGGAGCUGAGGCUCUGGG..... 2
NGS-Mature      .....CUGAGGCUCUGGGGUG..... 2
NGS-Mature      .....GCCUUGGGGAGCUGAGGCUCUGGG..... 2
NGS-Star        .....CUGGGCCUCUGCUCUCCAG..... 2
NGS-Mature      .....UGGGGAGCUGAGGCUCUGGGG..... 2
NGS-Star        .....ACCUGGGCCUCUGCUCUCCAG..... 1
NGS-Mature      .....CCUGGGGAGCUGAGGCUCUGGGGU..... 1
NGS-Star        .....CCUUGGGCCUCUGCUCUCCAG..... 1
NGS-Star        .....CCUUGGGCCUCUGCUCUCC..... 1

hsa-mir-1250 MI0006385 CUGUCCCGCUGGGCCUGGAGGUGACGGGUCUGGAUGUGGCCUUUUUCCUUUUUCAAAGGCCACAUUUCCAGCCAUUCCACCUUCCAGGCCUCUGAAGUGGCCACAGGC
((((((((((((((((((((((((((((((((((((((((((((((((((((((((((((((((((((((((((((((((((((
((((((((((((((((((((((((((((((((((((((((((((((((((((((((((((((((((((((((((((((((((((
.ACGGUGCUGGAUGUGGCCUUU..... 656
NGS-Mature      .....ACGGUGCUGGAUGUGGCCUUU..... 117
NGS-Mature      .....ACGGUGCUGGAUGUGGCCUU..... 92
NGS-Star        .....AGGCCACAUUUCCAGCCCAU..... 20
NGS-Mature      .....ACGGUGCUGGAUGUGGCCU..... 14
NGS-Mature      .....ACGGUGCUGGAUGUGGCC..... 9
NGS-Mature      .....ACGGUGCUGGAUGUGGCCUUUU..... 8
NGS-Star        .....AGGCCACAUUUCCAGCCCAU..... 3
NGS-Mature      .....ACGGUGCUGGAUGUGGCCUUUUU..... 2
NGS-Mature      .....CGGUGCUGGAUGUGGCCUUU..... 2
NGS-Mature      .....CGGUGCUGGAUGUGGCCUUUU..... 1
NGS-Mature      .....GACGGUGCUGGAUGUGGCCU..... 1

hsa-mir-3124 MI0014140 GCGGGCUCUCGCGGGCGAAGGCAAAAGUCGAUUUCCAAAAGUGACUUUCCUCACUCCCGUGAAGUCGGC
((((((((((((((((((((((((((((((((((((((((((((((((((((((((((((((((((((((((((((((((((((
((((((((((((((((((((((((((((((((((((((((((((((((((((((((((((((((((((((((((((((((((((
.UUCGCGGGCGAAGGCAAAAGUC..... 185
NGS-Mature      .....UUCGCGGGCGAAGGCAAAAGUC..... 164
NGS-Mature      .....UUCGCGGGCGAAGGCAAAAGU..... 93
NGS-Mature      .....UUCGCGGGCGAAGGCAAAAG..... 24
NGS-Mature      .....UCGCGGGCGAAGGCAAAAG..... 4
NGS-Mature      .....GCGGGCGAAGGCAAAAGUC..... 3
NGS-Mature      .....UUCGCGGGCGAAGGCAAA..... 2
NGS-Mature      .....CGCGGGCGAAGGCAAAAGUC..... 2
NGS-Star        .....CUUUCUCACUCCCGUGAAGU..... 2
NGS-Mature      GCGGGCUCUCGCGGGCGAAGGCAAAAG..... 1
NGS-Mature      .....GCUUCGCGGGCGAAGGCAAAAGU..... 1
NGS-Star        .....GCUUCGCGGGCGAAGGCAAAAGU..... 1
NGS-Star        .....UUCUCACUCCCGUGAAGUGGC..... 1

hsa-mir-653 MI0003674 UUCAUUCUUCAGUGUUGAAACAUCUCUACUGAACCCAGCUUCAAACAAGUUCACUGAGUUUUUCAAUAUUGCAAGAAUUAAGAUGGAAGC
((((((((((((((((((((((((((((((((((((((((((((((((((((((((((((((((((((((((((((((((((((
((((((((((((((((((((((((((((((((((((((((((((((((((((((((((((((((((((((((((((((((((((
GUGUUGAAACAUCUCUACUG..... 90
NGS-Star        .....UUCACUGGAGUUUGUUCAAU..... 70
NGS-Star        .....UUCACUGGAGUUUGUUCAAU..... 64
NGS-Mature      .....UUGAAACAUCUCUACUGAAC..... 59
NGS-Mature      .....UUGAAACAUCUCUACUGAAC..... 20
NGS-Star        .....ACUGGAGUUUGUUCAAUAU..... 12
NGS-Mature      .....UUGAAACAUCUCUACUGAA..... 10
NGS-Star        .....UUCACUGGAGUUUGUUCAA..... 5
NGS-Star        .....UUCACUGGAGUUUGUUUC..... 4
NGS-Mature      .....UGUUGAAACAUCUCUACUGA..... 4
NGS-Star        .....UUCACUGGAGUUUGUUCAAUAU..... 4
NGS-Star        .....UUCACUGGAGUUUGUUCA..... 4
NGS-Star        .....ACUGGAGUUUGUUCAAU..... 3
NGS-Star        .....UCACUGGAGUUUGUUCAAU..... 2

```







```

NGS-Star .....AAGGCACUAUGAGAUUUAGAAU..... 1

hsa-mir-216b MI0005569 GCAGACUGGAAAUCUCUGCAGGCAAUGUGAGUCACUGAGGAAAUCACACACUUACCCGUAGAGAUUCACAGUCUGACA
.(((((((.....(((((((.....(((((((.....(((((((.....)))))))))))))))))))))))))))))).....
hsa-miR-216b MIMAT0004959 .....AAAUCUCUGCAGGCAAUGUGA.....
NGS-Mature .....AAAUCUCUGCAGGCAAUGUGA..... 1747
NGS-Mature .....AAAUCUCUGCAGGCAAUGUG..... 693
NGS-Mature .....AAAUCUCUGCAGGCAAUGU..... 244
NGS-Mature .....AAAUCUCUGCAGGCAAUGUGAU..... 208
NGS-Mature .....AAAUCUCUGCAGGCAAUGUG..... 168
NGS-Mature .....AAAUCUCUGCAGGCAAUGU..... 108
NGS-Mature .....AAAUCUCUGCAGGCAAUGUGA..... 36
NGS-Mature .....AAAUCUCUGCAGGCAAUGUGAUG..... 36
NGS-Mature .....AAAUCUCUGCAGGCAAUG..... 16
NGS-Mature .....AAAUCUCUGCAGGCAAUG..... 7
NGS-Star .....CACUUACCCGUAGAGAUUCU..... 2
NGS-Star .....ACACUUACCCGUAGAGAUUC..... 2
NGS-Star .....ACACUUACCCGUAGAGAUUCU..... 1
NGS-Star .....ACACUUACCCGUAGAGAUUCUA..... 1
NGS-Star .....CACACUUACCCGUAGAGAUUC..... 1
NGS-Star .....CACACUUACCCGUAGAGAUUCU..... 1
NGS-Star .....CACUUACCCGUAGAGAUUC..... 1

hsa-mir-581 MI0003588 GUUAUGUGAAGGUAUUCUUGUGUUCUCUAGAUCAGUGCUUUUAGAAAUUUGUGUGAUUCAAGAACAACAAGAAUACCUACACAGAACCCUGC
(((.....(((((((.....(((((((.....(((((((.....)))))))))))))))))))))))))))))).....
hsa-miR-581 MIMAT0003246 .....UCUUGUGUUCUCUAGAUCAGU.....
NGS-Mature .....UCUUGUGUUCUCUAGAUCAGUGC..... 5
NGS-Mature .....CUUGUGUUCUCUAGAUCAGUG..... 4
NGS-Mature .....UCUUGUGUUCUCUAGAUCAGUG..... 2
NGS-Mature .....UCUUGUGUUCUCUAGAUCAGUGC..... 2
NGS-Star .....GUGAUCUAAAGAACAACAAGAAU..... 1
NGS-Star .....GUGUGAUCUAAAGAACAACAAGA..... 1
NGS-Star .....AUCUAAAGAACAACAAGAAUAC..... 1
NGS-Mature .....CUUGUGUUCUCUAGAUCAGUGC..... 1
NGS-Star .....UGUGAUCUAAAGAACAACAAGA..... 1
NGS-Mature .....UCUUGUGUUCUCUAGAUCAGU..... 1
NGS-Star .....GUGAUCUAAAGAACAACAAGA..... 1
NGS-Mature .....CUUGUGUUCUCUAGAUCAGU..... 1
NGS-Mature .....UUGUGUUCUCUAGAUCAGUGCUU..... 1
NGS-Mature .....UUGUGUUCUCUAGAUCAGUGCUUU..... 1

hsa-mir-1247 MI0006382 CCGCUUGCCUCGCCAGGCGAGCCCGGGCGCGACCCGUCCCGUUCGUCGCCGGACGUUGCUCUCUACCCCGGGAACGUCGAGACUGGAGCGCCGAAACUGAGCCACCUUCGCGGACCCCGAGAGCGGGG
(((((((.....(((((((.....(((((((.....(((((((.....)))))))))))))))))))))))))))))).....
hsa-miR-1247 MIMAT0005899 .....ACCCGUCCCGUUCGUCGCCGGA..... 1481
NGS-Mature .....ACCCGUCCCGUUCGUCGCCGGA..... 256
NGS-Mature .....ACCCGUCCCGUUCGUCGCCGG..... 41
NGS-Star .....CGGGAACGUCGAGACUGGAGC..... 26
NGS-Mature .....ACCCGUCCCGUUCGUCGCCG..... 22
NGS-Mature .....ACCCGUCCCGUUCGUCGCC..... 21
NGS-Star .....CGGGAACGUCGAGACUGGAG..... 18
NGS-Mature .....ACCCGUCCCGUUCGUCGCC..... 8
NGS-Star .....CGGGAACGUCGAGACUGGA..... 8
NGS-Mature .....ACCCGUCCCGUUCGUCGCCGGAC..... 7
NGS-Mature .....CCCGUCCCGUUCGUCGCCGGA..... 4
NGS-Mature .....CACCCGUCCCGUUCGUCGCCG..... 2
NGS-Mature .....CACCCGUCCCGUUCGUCGCCGG..... 2
NGS-Star .....CGGGAACGUCGAGACUGG..... 2
NGS-Star .....CCCGGGAACGUCGAGACUGGAG..... 1
NGS-Star .....GGGAACGUCGAGACUGGAGC..... 1

hsa-mir-1270-1 MI0006407 CACAGAGUUAUACUGGAGAUUUGGAAGAGCUGUGUGGGUAUAAGUAACAGGCUUUUCUUUAUCUUCUUAUGUGGCUCUUUGCA
(((.....(((((((.....(((((((.....(((((((.....)))))))))))))))))))))))))))))).....
hsa-miR-1270 MIMAT0005924 .....CUGGAGAUUUGGAAGAGCUGUGU..... 1685
NGS-Mature .....CUGGAGAUUUGGAAGAGCUGUGU..... 285
NGS-Mature .....CUGGAGAUUUGGAAGAGCUGU..... 196
NGS-Mature .....CUGGAGAUUUGGAAGAGCUGUG..... 141
NGS-Mature .....CUGGAGAUUUGGAAGAGCUGUGU..... 132
NGS-Mature .....ACUGGAGAUUUGGAAGAGCUGU..... 119
NGS-Mature .....CUGGAGAUUUGGAAGAGCUG..... 116
NGS-Mature .....CUGGAGAUUUGGAAGAGCU..... 101
NGS-Mature .....ACUGGAGAUUUGGAAGAGCUGUG..... 89
NGS-Mature .....ACUGGAGAUUUGGAAGAGCUG..... 54
NGS-Star .....CAGGCUUUUCUUUAUCUUCUAU..... 4
NGS-Star .....AGGCUUUUCUUUAUCUUCUAUGU..... 2
NGS-Star .....AGGCUUUUCUUUAUCUUCUA..... 1
NGS-Star .....AGGCUUUUCUUUAUCUUCUA..... 1
NGS-Star .....AGGCUUUUCUUUAUCUUCUAUG..... 1

```





|                           |                                                                                                              |      |
|---------------------------|--------------------------------------------------------------------------------------------------------------|------|
| NGS-Mature                | .....AGAUGUAUGGAAUCUGUAUA.....                                                                               | 22   |
| NGS-Mature                | .....AGAUGUAUGGAAUCUGUAUAUA.....                                                                             | 12   |
| NGS-Star                  | .....UAUAUAGAUUCCAUAUAUA.....                                                                                | 10   |
| NGS-Mature                | .....AGAGAUGUAUGGAAUCUGUAU.....                                                                              | 6    |
| NGS-Star                  | .....UAUAUAGAUUCCAUAUAUA.....                                                                                | 3    |
| NGS-Mature                | .....AGAUGUAUGGAAUCUGUA.....                                                                                 | 3    |
| NGS-Mature                | .....AGAUGUAUGGAAUCUGUAUAUAUCU.....                                                                          | 2    |
| NGS-Mature                | .....AGAUGUAUGGAAUCUGUAUAUAUC.....                                                                           | 2    |
| NGS-Star                  | .....UAUAUAGAUUCCAUAUAUA.....                                                                                | 1    |
| hsa-mir-1251 MI0006386    |                                                                                                              |      |
|                           | GUGGACUCUAGCUGCCAAAGGCGCUUCUCUCUGAACAGCGCUUUGCUCAGCCAGUGUAGACAUGGC                                           |      |
|                           | (((((.....)))))).....                                                                                        |      |
| hsa-miR-1251 MIMAT0005903 | .....ACUCUAGCUGCCAAAGGCGCU.....                                                                              |      |
| NGS-Mature                | .....ACUCUAGCUGCCAAAGGCGCU.....                                                                              | 61   |
| NGS-Mature                | .....ACUCUAGCUGCCAAAGGCGCU.....                                                                              | 12   |
| NGS-Mature                | .....ACUCUAGCUGCCAAAGGCGG.....                                                                               | 9    |
| NGS-Mature                | .....ACUCUAGCUGCCAAAGGCGC.....                                                                               | 8    |
| NGS-Mature                | .....ACUCUAGCUGCCAAAGGCGCUUC.....                                                                            | 3    |
| NGS-Mature                | .....ACUCUAGCUGCCAAAGGCGCUUC.....                                                                            | 2    |
| NGS-Star                  | .....AGGCUUUGCUCAGCCAGUGUAG.....                                                                             | 2    |
| NGS-Star                  | .....CGCUUUGCUCAGCCAGUGUAG.....                                                                              | 2    |
| NGS-Mature                | .....ACUCUAGCUGCCAAAGGC.....                                                                                 | 1    |
| hsa-mir-1267 MI0006404    |                                                                                                              |      |
|                           | CUCCCAAUUCUCCUGUUGAAGUGUAUCCCCACCUCAGCAUUGGGGAUUACAUUUCAACAUGAGAUUUGGAGAGGA                                  |      |
|                           | (((((.....)))))).....                                                                                        |      |
| hsa-miR-1267 MIMAT0005921 | .....CCUGUUGAAGUGUAUCCCA.....                                                                                |      |
| NGS-Star                  | .....UGGGGAUUACAUUUCAACAUGA.....                                                                             | 64   |
| NGS-Star                  | .....UGGGGAUUACAUUUCAACAUG.....                                                                              | 25   |
| NGS-Mature                | .....CCUGUUGAAGUGUAUCCCA.....                                                                                | 20   |
| NGS-Mature                | .....CCUGUUGAAGUGUAUCCCC.....                                                                                | 6    |
| NGS-Star                  | .....GGGGAUUACAUUUCAACAUGA.....                                                                              | 2    |
| NGS-Star                  | .....AGCAUUGGGGAUUACAUU.....                                                                                 | 1    |
| NGS-Mature                | .....CUGUUGAAGUGUAUCCCCACC.....                                                                              | 1    |
| NGS-Mature                | .....CCUGUUGAAGUGUAUCCCC.....                                                                                | 1    |
| NGS-Mature                | .....CCUGUUGAAGUGUAUCCCCAC.....                                                                              | 1    |
| NGS-Mature                | .....CUGUUGAAGUGUAUCCCCCA.....                                                                               | 1    |
| NGS-Mature                | .....CUGUUGAAGUGUAUCCCCAC.....                                                                               | 1    |
| NGS-Star                  | .....UUGGGGAUUACAUUUCAACA.....                                                                               | 1    |
| hsa-mir-1298 MI0003938    |                                                                                                              |      |
|                           | AGACGAGGAGUUAAGAGUUAUUCGGCUGUCCAGAUGUAUCCAAGUACCCUGUGUUAUUUGGCAUAAAUAACAUCUGGGCAACUGACUGAACUUUACUUUCAUGACUCA |      |
|                           | (((((.....)))))).....                                                                                        |      |
| hsa-miR-1298 MIMAT0005800 | .....UUCAUUCGGCUGUCCAGAUGUA.....                                                                             |      |
| NGS-Mature                | .....UUCAUUCGGCUGUCCAGAUGUA.....                                                                             | 2404 |
| NGS-Mature                | .....UUCAUUCGGCUGUCCAGAUGU.....                                                                              | 792  |
| NGS-Mature                | .....UUCAUUCGGCUGUCCAGAUGUA.....                                                                             | 466  |
| NGS-Mature                | .....UUCAUUCGGCUGUCCAGAUGUAUC.....                                                                           | 455  |
| NGS-Mature                | .....UUCAUUCGGCUGUCCAGAUA.....                                                                               | 306  |
| NGS-Mature                | .....UUCAUUCGGCUGUCCAGAUG.....                                                                               | 112  |
| NGS-Star                  | .....CAUCUGGGCAACUGACUGAACU.....                                                                             | 36   |
| NGS-Mature                | .....UUCAUUCGGCUGUCCAGA.....                                                                                 | 32   |
| NGS-Star                  | .....CAUCUGGGCAACUGACUGA.....                                                                                | 22   |
| NGS-Mature                | .....UCAUUCGGCUGUCCAGAUGUA.....                                                                              | 20   |
| NGS-Mature                | .....UCAUUCGGCUGUCCAGAUGUA.....                                                                              | 15   |
| NGS-Mature                | .....UUCAUUCGGCUGUCCAGAUGUAUCC.....                                                                          | 13   |
| NGS-Star                  | .....CAUCUGGGCAACUGACUGAA.....                                                                               | 12   |
| NGS-Star                  | .....CAUCUGGGCAACUGACUGAAC.....                                                                              | 11   |
| NGS-Star                  | .....AUACAUCUGGGCAACUGACUGA.....                                                                             | 5    |
| NGS-Star                  | .....UACAUCUGGGCAACUGACUGA.....                                                                              | 2    |
| NGS-Star                  | .....AAUACAUCUGGGCAACUGACUGA.....                                                                            | 1    |
| NGS-Star                  | .....UGGGCAACUGACUGAACU.....                                                                                 | 1    |
| NGS-Star                  | .....UAAAUAACAUCUGGGCAACUGACUGAA.....                                                                        | 1    |
| NGS-Star                  | .....UCUGGGCAACUGACUGAACU.....                                                                               | 1    |
| hsa-mir-216a MI0000292    |                                                                                                              |      |
|                           | GAUGGCUGAGUUGGCUUAAUUCACGUGGCAACUGUGAGUAUUAUCAAUCCUCACAGUGGUCUCUGGGAUUAGCUAAACAGAGCAUUUCCUAGCCUCACGA         |      |
|                           | (((((.....)))))).....                                                                                        |      |
| hsa-miR-216a MIMAT0000273 | .....UAUUCUAGCUGGCAACUGUGA.....                                                                              |      |
| NGS-Mature                | .....UAUUCUAGCUGGCAACUGUGA.....                                                                              | 28   |
| NGS-Mature                | .....UAUUCUAGCUGGCAACUGUGAG.....                                                                             | 16   |
| NGS-Mature                | .....UAUUCUAGCUGGCAACU.....                                                                                  | 15   |
| NGS-Mature                | .....AAUCUAGCUGGCAACUGUGAG.....                                                                              | 9    |
| NGS-Mature                | .....AAUCUAGCUGGCAACUGU.....                                                                                 | 9    |
| NGS-Star                  | .....CACAGUGGUCUCUGGGAUUAG.....                                                                              | 8    |
| NGS-Mature                | .....UAUUCUAGCUGGCAACUGU.....                                                                                | 6    |
| NGS-Mature                | .....UAUUCUAGCUGGCAACUGUGAGA.....                                                                            | 5    |
| NGS-Mature                | .....AAUCUAGCUGGCAACUGUG.....                                                                                | 4    |
| NGS-Star                  | .....CACAGUGGUCUCUGGGAUU.....                                                                                | 3    |
| NGS-Mature                | .....AAUCUAGCUGGCAACUG.....                                                                                  | 2    |
| NGS-Star                  | .....CACAGUGGUCUCUGGGAUU.....                                                                                | 2    |
| NGS-Mature                | .....UAUUCUAGCUGGCAACUG.....                                                                                 | 2    |
| NGS-Star                  | .....UCACAGUGGUCUCUGGGAUU.....                                                                               | 2    |

```

NGS-Star .....CACAGUGGUCUCUGGGAU..... 1
NGS-Star .....ACAGUGGUCUCUGGGAUUAUUGCU..... 1
NGS-Star .....UCACAGUGGUCUCUGGGAUUAU..... 1
NGS-Star .....ACAGUGGUCUCUGGGAUUAU..... 1

hsa-mir-3181 MI0014223 CGGCGACCAUCGGGCCUCGGCGCCGGCCCGUAGUUGCCGGCCGAGCCGGCCGGCCCGGGUUGCCG
(((((((.....(((((((.....(((.....)))))).....)))))).....)))))).....)))))
hsa-miR-3181 MIMAT0015061 .....AUCGGGCCUCGGCGCCGG..... 6
NGS-Mature .....AUCGGGCCUCGGCGCCGCC..... 5
NGS-Mature .....AUCGGGCCUCGGCGCCGG..... 6
NGS-Star .....GCCAGCCGGCCGGCCGCC..... 4
NGS-Mature .....AUCGGGCCUCGGCGCCGCC..... 3
NGS-Mature .....AUCGGGCCUCGGCGCCGCC..... 2
NGS-Star .....CCCAGCCGGCCGGCCGCC..... 1
NGS-Star .....CCCAGCCGGCCGGCCGCCGGG..... 1
NGS-Mature .....AUCGGGCCUCGGCGCCGG..... 1
NGS-Mature .....AUCGGGCCUCGGCGCCCGU..... 1
NGS-Star .....GCCAGCCGGCCGGCCCGGGU..... 1

hsa-mir-211 MI000287 UCACUUGGCCAUGUGACUUGUGGGCUUCCUUGUCAUCCUUGCCUAGGGUCUGAGCAGGGCAGGGACAGCAAAGGGGUGCUCAGUUGUCACUCCACAGCAGGGAG
((.....(((((((.....(((((((.....)))))).....)))))).....)))))).....)))))
hsa-miR-211 MIMAT000268 .....UUCCUUUGUCAUCCUUGCCU..... 26764
NGS-Mature .....UUCCUUUGUCAUCCUUGCCU..... 8260
NGS-Mature .....UUCCUUUGUCAUCCUUGCCU..... 4060
NGS-Mature .....UUCCUUUGUCAUCCUUGCCU..... 797
NGS-Mature .....UUCCUUUGUCAUCCUUGCCU..... 782
NGS-Star .....GCAGGGACAGCAAAGGGGUGC..... 407
NGS-Mature .....UUCCUUUGUCAUCCUUGCCU..... 220
NGS-Star .....GCAGGGACAGCAAAGGGGUG..... 185
NGS-Mature .....GCCAUGUGACUUGUGGGC..... 112
NGS-Mature .....CCUUGUCAUCCUUGCCU..... 96
NGS-Mature .....UUCCUUUGUCAUCCUUG..... 79
NGS-Mature .....CCUUGUCAUCCUUGCCU..... 56
NGS-Star .....GCAGGGACAGCAAAGGGGU..... 38
NGS-Star .....GCAGGGACAGCAAAGGGGUGCU..... 19
NGS-Star .....GCCAGGGACAGCAAAGGGGUGC..... 11
NGS-Star .....CAGGGACAGCAAAGGGGUGC..... 6
NGS-Star .....GCAGGGACAGCAAAGGGG..... 5
NGS-Star .....CAGGGACAGCAAAGGGGUG..... 4
NGS-Star .....GCCAGGGACAGCAAAGGGGUG..... 4
NGS-Star .....GCCAGGGACAGCAAAGGGGU..... 3

hsa-mir-3161 MI0014191 CCUCGAGAGCUGAUAGAAGACAGAGGCCAGAUUGAAGUUGAAUAGUGCGGGCCUUUGUUUUUACCAAGUUCUCCUGG
(((.....(((((((.....(((((((.....)))))).....)))))).....)))))).....)))))
hsa-miR-3161 MIMAT0015035 .....CUGAUAGAAGACAGAGGCCAGAU..... 28
NGS-Mature .....CUGAUAGAAGACAGAGGCCAGA..... 6
NGS-Mature .....CUGAUAGAAGACAGAGGCCAGAU..... 5
NGS-Mature .....CUGAUAGAAGACAGAGGCC..... 2
NGS-Mature .....AGAGGCCAGAUUGAAGUU..... 1
NGS-Mature .....CUGAUAGAAGACAGAGGCC..... 1
NGS-Mature .....GCUGAUAGAAGACAGAGGCCA..... 1
NGS-Mature .....GCUGAUAGAAGACAGAGGCCAGA..... 1
NGS-Mature .....UGAUAGAAGACAGAGGCCAG..... 1
NGS-Star .....UGGCCUUUGUUUUUACCAAGUU..... 1
NGS-Mature .....CUGAUAGAAGACAGAGGCCA..... 1

hsa-mir-498 MI0003142 AACCCUCCUUGGGAAGUGAAGCUCAGGCUGUGAUUUCAAGCCAGGGGGCGUUUUUCAUAACUGGAUAAAAGCACCUCAGAGCUUAGAGCUCACAGUUUAGAGCAAUCGUCUAAAGGAAGUU
(((((((.....(((((((.....(((((((.....)))))).....)))))).....)))))).....)))))
hsa-miR-498 MIMAT0002824 .....UUUCAAGCCAGGGGGCGUUUUUC..... 106
NGS-Mature .....UUUCAAGCCAGGGGGCGUUUUUC..... 45
NGS-Mature .....UUUCAAGCCAGGGGGCGUUUUUC..... 22
NGS-Mature .....UUUCAAGCCAGGGGGCGUUUU..... 13
NGS-Mature .....UUUCAAGCCAGGGGGCGUUU..... 7
NGS-Star .....AAAGCACCUCAGAGCUUAGAGCU..... 5
NGS-Star .....AAAGCACCUCAGAGCUUAGAGCU..... 4
NGS-Star .....AAAGCACCUCAGAGCUUAGAGC..... 3
NGS-Star .....AAAGCACCUCAGAGCUUAGAGCUA..... 2
NGS-Star .....AAAGCACCUCAGAGCUUGA..... 2
NGS-Mature .....UUUCAAGCCAGGGGGCGU..... 2
NGS-Mature .....UUUCAAGCCAGGGGGCGUUUUUC..... 1
NGS-Mature .....UUUCAAGCCAGGGGGCGUUUUUC..... 1
NGS-Mature .....UUUCAAGCCAGGGGGCGUU..... 1
NGS-Mature .....AAGUGAAGCUCAGGCUGUGA..... 1
NGS-Star .....AAAGCACCUCAGAGCUUG..... 1

hsa-mir-510 MI0003197 GUGGUGUCCUACUCAGGAGAGUGGCAUAUCACAUUUUAGGUGUGAUUUAAACCUUAAGAGUGGAGUAACAC
(((((((.....(((((((.....(((((((.....)))))).....)))))).....)))))).....)))))

```

|              |              |                                                                                                                                |     |
|--------------|--------------|--------------------------------------------------------------------------------------------------------------------------------|-----|
| hsa-miR-510  | MIMAT0002882 | .....UACUCAGGAGAGUGGCAUACAC.....                                                                                               |     |
| NGS-Mature   |              | .....UACUCAGGAGAGUGGCAAUACA.....                                                                                               | 244 |
| NGS-Mature   |              | .....UACUCAGGAGAGUGGCAAUACACA.....                                                                                             | 194 |
| NGS-Mature   |              | .....UACUCAGGAGAGUGGCAUACAC.....                                                                                               | 107 |
| NGS-Mature   |              | .....UACUCAGGAGAGUGGCAAU.....                                                                                                  | 41  |
| NGS-Star     |              | .....UGAUUGAAACCUCUAAGAGUGGA.....                                                                                              | 24  |
| NGS-Mature   |              | .....UACUCAGGAGAGUGGCAAU.....                                                                                                  | 17  |
| NGS-Star     |              | .....AUUGAAACCUCUAAGAGUGGA.....                                                                                                | 14  |
| NGS-Mature   |              | .....UACUCAGGAGAGUGGCAAUACAU.....                                                                                              | 6   |
| NGS-Mature   |              | .....UACUCAGGAGAGUGGCAA.....                                                                                                   | 3   |
| NGS-Star     |              | .....UGAUUGAAACCUCUAAGAGUGG.....                                                                                               | 3   |
| NGS-Star     |              | .....UGAUUGAAACCUCUAAGAG.....                                                                                                  | 2   |
| NGS-Star     |              | .....GAUUGAAACCUCUAAGAGUGGA.....                                                                                               | 2   |
| NGS-Mature   |              | .....ACUCAGGAGAGUGGCAAUACA.....                                                                                                | 2   |
| NGS-Star     |              | .....AUUGAAACCUCUAAGAGUGG.....                                                                                                 | 1   |
| hsa-mir-513b | MI0006648    | GUGUACAGUGCCUUUACACAAGGAGGUGUCAUUUUUGUGAACUAAAUAUUAAUGUCACCUUUUUGAGAGGAGUAAUGUACAGCA<br>..(((((((((.....))))))))).....         |     |
| hsa-miR-513b | MIMAT0005788 | .....UUCACAAGGAGGUGUCAUUUA.....                                                                                                |     |
| NGS-Mature   |              | .....UUCACAAGGAGGUGUCAUUUAU.....                                                                                               | 577 |
| NGS-Mature   |              | .....UUCACAAGGAGGUGUCAUUUAUG.....                                                                                              | 189 |
| NGS-Mature   |              | .....UUCACAAGGAGGUGUCAUU.....                                                                                                  | 80  |
| NGS-Mature   |              | .....UUCACAAGGAGGUGUCAUUUA.....                                                                                                | 67  |
| NGS-Mature   |              | .....UUCACAAGGAGGUGUCAUU.....                                                                                                  | 55  |
| NGS-Mature   |              | .....UUCACAAGGAGGUGUCAUUUAUGU.....                                                                                             | 21  |
| NGS-Star     |              | .....UAAAUGUCACCUUUUUGAGAGGA.....                                                                                              | 13  |
| NGS-Star     |              | .....UAAAUGUCACCUUUUUGAGAGG.....                                                                                               | 10  |
| NGS-Mature   |              | .....UUCACAAGGAGGUGUCAU.....                                                                                                   | 9   |
| NGS-Mature   |              | .....ACAAGGAGGUGUCAUUUAU.....                                                                                                  | 7   |
| NGS-Mature   |              | .....UCACAAGGAGGUGUCAUUUAU.....                                                                                                | 4   |
| NGS-Star     |              | .....AAAUGUCACCUUUUUGAGAGG.....                                                                                                | 3   |
| NGS-Mature   |              | .....UCACAAGGAGGUGUCAUUUAUG.....                                                                                               | 3   |
| NGS-Star     |              | .....AAAUGUCACCUUUUUGAGAGGA.....                                                                                               | 1   |
| hsa-mir-586  | MI0003594    | AUGGGGUAAAACCAUUUGCAUUGUAUUUUUAGGUCCCAUAUCAUGUGGGCCCUAAAUAUCAUUGCAUAAUGGUUUUCACUCUUUUCUUUUAU<br>..(((((((((.....)))))))))..... |     |
| hsa-miR-586  | MIMAT0003252 | .....UAUGCAUUGUAUUUUUAGGUCC.....                                                                                               |     |
| NGS-Mature   |              | .....UAUGCAUUGUAUUUUUAGGUCC.....                                                                                               | 2   |
| NGS-Star     |              | .....GCCUAAAUAUCAUUGCAUA.....                                                                                                  | 1   |
| NGS-Mature   |              | .....AUGCAUUGUAUUUUUAGGUCC.....                                                                                                | 1   |
| NGS-Mature   |              | .....AUGCAUUGUAUUUUUAGGU.....                                                                                                  | 1   |
| hsa-mir-890  | MI0005533    | GGAAUGGCCUACUUGGAAAGGCAUCAGUGCUUAGAUAUCAUGUAACUAUCCCUUUCUGAGUAGAUAGUCUUA<br>(((.....))).....                                   |     |
| hsa-miR-890  | MIMAT0004912 | .....UACUUGGAAAGGCAUCAGUUG.....                                                                                                |     |
| NGS-Mature   |              | .....UACUUGGAAAGGCAUCAGUUG.....                                                                                                | 10  |
| NGS-Star     |              | .....AACUUAUCCCUUUCUGAGUAGA.....                                                                                               | 6   |
| NGS-Mature   |              | .....UACUUGGAAAGGCAUCAGUUGC.....                                                                                               | 3   |
| NGS-Mature   |              | .....UACUUGGAAAGGCAUCAGUUGCU.....                                                                                              | 1   |
| hsa-mir-934  | MI0005756    | AGAAAUAAGGCUUCUGUCUACUCUGGAGACACUGGUAGUAUAAAACCCAGAGUCUCCAGUAAUGGACGGGAGCCUUUUUUU<br>(((((((((((((.....))))))))).....          |     |
| hsa-miR-934  | MIMAT0004977 | .....UGUCUACUACUGGAGACACUGG.....                                                                                               |     |
| NGS-Mature   |              | .....UGUCUACUACUGGAGACAC.....                                                                                                  | 28  |
| NGS-Mature   |              | .....UGUCUACUACUGGAGACACU.....                                                                                                 | 21  |
| NGS-Mature   |              | .....UGUCUACUACUGGAGACACUGG.....                                                                                               | 15  |
| NGS-Mature   |              | .....UGUCUACUACUGGAGACACUG.....                                                                                                | 7   |
| NGS-Mature   |              | .....UCUGUCUACUACUGGAGACACU.....                                                                                               | 6   |
| NGS-Mature   |              | .....UGUCUACUACUGGAGACACUGGU.....                                                                                              | 2   |
| NGS-Mature   |              | .....UCUACUACUGGAGACACU.....                                                                                                   | 1   |
| NGS-Mature   |              | .....UCUGUCUACUACUGGAGACACUG.....                                                                                              | 1   |
| NGS-Mature   |              | .....UCUGUCUACUACUGGAGACA.....                                                                                                 | 1   |
| NGS-Star     |              | .....GAGUCUCCAGUAAUGGACGGGA.....                                                                                               | 1   |
| hsa-mir-588  | MI0003597    | AGCUUAGGUACCAAUUUGGCCACAAGGGUUGAGAACAUUCCAUUUGUUCUUAACCACCAUGGCCAAAAUUGGCCUUAG<br>..(((((((((.....))))))))).....               |     |
| hsa-miR-588  | MIMAT0003255 | .....UUGGCCCAAUGGGUUAGAAC.....                                                                                                 |     |
| NGS-Mature   |              | .....UGGCCCAAUGGGUUAGAACA.....                                                                                                 | 10  |
| NGS-Mature   |              | .....UGGCCCAAUGGGUUAGAACAC.....                                                                                                | 9   |
| NGS-Mature   |              | .....UGGCCCAAUGGGUUAGAAC.....                                                                                                  | 7   |
| NGS-Star     |              | .....UUCUUAACCACCAUGGCCAAAA.....                                                                                               | 6   |
| NGS-Star     |              | .....UUCUUAACCACCAUGGCCAA.....                                                                                                 | 5   |
| NGS-Star     |              | .....UUCUUAACCACCAUGGCCAAA.....                                                                                                | 4   |
| NGS-Star     |              | .....UUCUUAACCACCAUGGCCAAAAU.....                                                                                              | 2   |
| NGS-Mature   |              | .....CCCAAUGGGUUAGAACAC.....                                                                                                   | 1   |
| NGS-Star     |              | .....UCUUAACCACCAUGGCCAAAA.....                                                                                                | 1   |
| NGS-Mature   |              | .....UGGCCCAAUGGGUUAGAACACU.....                                                                                               | 1   |
| NGS-Star     |              | .....UUCUUAACCACCAUGGCCA.....                                                                                                  | 1   |
| NGS-Mature   |              | .....UUGGCCCAAUGGGUUAGAAC.....                                                                                                 | 1   |

NGS-Mature .....UUGGCCACA AUGGGUUAACA..... 1

hsa-mir-602 MI0003615 UUCUCACCCCCCGUGACACGGGGCAGCUCGCGCCCCUGUGUUACUCUGGGCCGAGUCGUCUCCUGUCAGGCAAGGGAGAGCAGAGCCCCUCG  
..(((.(((.(((((((.(((((((.(((((((.(.....)))))))))))))))))))))).....

hsa-miR-602 MIMAT0003270 .....GACACGGGGCAGCUCGCGGCC.....

NGS-Mature .....UGACACGGGGCAGCUCGCGGCC..... 4

NGS-Mature .....UGACACGGGGCAGCUCGCGGCC..... 2

NGS-Star .....GGCCGAGUCGUCUCCUGUCA..... 1

NGS-Mature .....GACACGGGGCAGCUCGCGGCC..... 1

NGS-Mature .....GACACGGGGCAGCUCGCGGCC..... 1

hsa-mir-670 MI0003933 GUUUAGGGGUGACCUGAUGUCCUGAGUGU AUGUGGUAACCGAUAUUUGCCUUGGGUUUCUCAUAUUAUUCAGGAGUGUCAGUUGCCCUUCAC  
((..(((.(.((((((.(((((((.(((((((.(.....)))))))))))))))))))))).....

hsa-miR-670 MIMAT0010357 .....GUCCUGAGUGUAUGUGGUG.....

NGS-Star .....UUUCCUCAUAUUAUUCAGGAGU..... 55

NGS-Star .....UUUCCUCAUAUUAUUCAGGAG..... 11

NGS-Star .....UUUCCUCAUAUUAUUCAGGAGUGU..... 10

NGS-Star .....UUUCCUCAUAUUAUUCAGGAGUG..... 6

NGS-Star .....UCCUCAUAUUAUUCAGGAGUGU..... 5

NGS-Mature .....GUCCUGAGUGUAUGUGGUAACC..... 3

NGS-Star .....CCUCAUAUUAUUCAGGAGUGU..... 3

NGS-Star .....UUUCCUCAUAUUAUUCAGGA..... 2

NGS-Mature .....GUCCUGAGUGUAUGUGGUGAA..... 2

NGS-Star .....UCCUCAUAUUAUUCAGGAGU..... 2

NGS-Mature .....GUCCUGAGUGUAUGUGGUG..... 1

NGS-Mature .....GUCCUGAGUGUAUGUGGUGAAC..... 1

NGS-Star .....UCCUCAUAUUAUUCAGGAGUG..... 1

hsa-mir-802 MI0003906 GUUCUGUUAUUUGCAGUCAGUACAAGAUUAUCCUUGUGUCAUCAUGCAACAGGAGAUCUUUGUCACUUAGUGUAUUAAUAGCUGGAC  
..((((((.(((((((.(((((((.(((((((.(.....)))))))))))))))))))))).....

hsa-miR-802 MIMAT0004185 .....CAGUAAACAAGAUAUCCUUGU.....

NGS-Star .....AGGAGAAUCUUUGUCACUUAGU..... 5

NGS-Star .....AGGAGAAUCUUUGUCACUUAG..... 3

NGS-Mature .....UCAGUAAACAAGAUAUCCUUG..... 2

NGS-Star .....AGGAGAAUCUUUGUCACUU..... 2

NGS-Star .....AAGGAGAAUCUUUGUCACUUAGU..... 2

NGS-Mature .....UCAGUAAACAAGAUAUCCU..... 1

NGS-Star .....AGGAGAAUCUUUGUCACUUA..... 1

hsa-mir-609 MI0003622 UGCUCGGCUGUUCUAGGGUGUUUCUCUCAUCUCUGUCUAUUAUUGGGUUAUUAGUAGAGAGAGGGAACACCCUAGGAACAGCAGGGAACC  
..((((((((((((((((((((((((((((((.....)))))))))))))))))))))).....

hsa-miR-609 MIMAT0003277 .....AGGGUGUUUCUCUCAUCUCU.....

NGS-Mature .....AGGGUGUUUCUCUCAUCUCUG..... 3

NGS-Mature .....UAGGGUGUUUCUCUCAUCUC..... 1

NGS-Mature .....UAGGGUGUUUCUCUCAUCUCUG..... 1

NGS-Star .....UAGAGAUAGGGCAACCCCU..... 1

hsa-mir-548m MI0006400 AUAUUAGGUUGUGCAAAGGUUUUGGUUUUUGUCAUUAAGUAAGCAAAGCCACAAAUACCUUUGCACCACCUAAUAUUA  
(((.....)))))))))))))))))))))))))))))))))))))))))))))).....

hsa-miR-548m MIMAT0005917 .....CAAAGGUUUUGGUUUUUG.....

NGS-Mature .....CAAAGGUUUUGGUUUUUGU..... 3

NGS-Mature .....CAAAGGUUUUGGUUUUUG..... 2

NGS-Star .....AAAAGCCAAAUACCUUUGCA..... 1

hsa-mir-500b MI0015903 CCCCCUCUAUAUCCUUGCUACCGGGUGAGAGUCUUUCGAAUGCAGUCACCCAGGCAAGGAUUCUGCAAGGGGA  
(((.....)))))))))))))))))))))))))))))))))))))))))))))).....

hsa-miR-500b MIMAT0016925 .....AAUCCUUGCUACCGGGU.....

hsa-miR-500a MIMAT0004773 .....UAAUCCUUGCUACCGGGUGAGA.....

NGS-Mature .....UAAUCCUUGCUACCGGGUGAGAGU..... 785

NGS-Mature .....UAAUCCUUGCUACCGGGUGAGA..... 724

NGS-Mature .....UAAUCCUUGCUACCGGGUGAGAG..... 247

NGS-Mature .....UAAUCCUUGCUACCGGGUGAG..... 131

NGS-Mature .....UAAUCCUUGCUACCGGGUGAGAGUC..... 106

NGS-Mature .....UAAUCCUUGCUACCGGGUGAGAGU..... 63

NGS-Star .....AGUCACCCAGGCAAGGAUUCU..... 40

NGS-Mature .....UAAUCCUUGCUACCGGGU..... 34

NGS-Star .....AGUCACCCAGGCAAGGAU..... 32

NGS-Star .....AGUCACCCAGGCAAGGA..... 29

NGS-Star .....AGUCACCCAGGCAAGGAUUCUG..... 29

NGS-Star .....GUCACCCAGGCAAGGAU..... 29

NGS-Star .....UGCACCCAGGCAAGGAUUCUG..... 27

NGS-Mature .....UAAUCCUUGCUACCGGGUGA..... 26

NGS-Mature .....UAAUCCUUGCUACCGGG..... 22

NGS-Star .....GUCACCCAGGCAAGGAUUCUG..... 21

NGS-Star .....GUCACCCAGGCAAGGAUUCUG..... 17

NGS-Star .....UGCACCCAGGCAAGGAUUCUG..... 15

NGS-Star .....UGCACCCAGGCAAGGAU..... 15

NGS-Mature .....AAUCCUUGCUACCGGGUGAGA..... 11

hsa-mir-527 MI0003179 UCUCAAGCUGUGACUGCAAAGGGAAGCCUUCUUGUGUCUAAAAGAAAAGAAUGUCUUCUCCUUGGGAAUUACGGUUUGAGA









```

hsa-miR-3659 MIMAT0018080      .UGAGUGUUGUCUACGAGGGCA.....
NGS-Mature                    .....UGAGUGUUGUCUACGAGGGCAU..... 37
NGS-Mature                    .....UGAGUGUUGUCUACGAGGGC..... 5
NGS-Mature                    .....UGAGUGUUGUCUACGAGGGCA..... 5
NGS-Mature                    .....UGAGUGUUGUCUACGAGGG..... 4
NGS-Mature                    .....UGAGUGUUGUCUACGAGG..... 1
NGS-Star                      .....AUGCCUUUGUACACACACACGU..... 1

hsa-mir-3150b MI0016426      GAGGGAAAGCAGGCCAACCCUCGAGGAUCUCCCCAGCCUUGCGGUUCAGGUGCUGAGGAGAUUCGCGAGGUUGGCCUUCUCCCCUC
(((.....((((((((((((((((((((((((((((((((((((((((((((((((((((((((((((.....)))))))))))))))))))))
hsa-miR-3150b MIMAT0018194    .....UGAGGGAUUCGUCGAGGUUGG.....
NGS-Mature                    .....UGAGGGAUUCGUCGAGGUUGG..... 786
NGS-Mature                    .....UGAGGGAUUCGUCGAGGUUGGC..... 676
NGS-Mature                    .....UGAGGGAUUCGUCGAGGUUG..... 656
NGS-Mature                    .....UGAGGGAUUCGUCGAGGUU..... 375
NGS-Mature                    .....CUGAGGGAUUCGUCGAGGUUGG..... 160
NGS-Mature                    .....GAGGGAUUCGUCGAGGUUGGC..... 151
NGS-Mature                    .....GAGGGAUUCGUCGAGGUUGG..... 112
NGS-Mature                    .....CUGAGGGAUUCGUCGAGGUUG..... 96
NGS-Mature                    .....CUGAGGGAUUCGUCGAGGUU..... 86
NGS-Mature                    .....GAGGGAUUCGUCGAGGUUG..... 81
NGS-Star                      .....CAACCUCGAGGAUCUCCCCAG..... 6
NGS-Star                      .....AACCCUCGAGGAUCUCCCCAGC..... 6
NGS-Star                      .....AGGCCAACCCUCGAGGAUCUC..... 4
NGS-Star                      .....AGGCCAACCCUCGAGGAUCU..... 3
NGS-Star                      .....AGGCCAACCCUCGAGGAUCUCC..... 3
NGS-Star                      .....AACCCUCGAGGAUCUCCCCAGCC..... 2

NGS-Star                      .....AGGCCAACCCUCGAGGAUCUCC..... 2
NGS-Star                      .....CAGGCCAACCCUCGAGGAUCUC..... 1
NGS-Star                      .....CCAACCUCGAGGAUCUCCCCA..... 1
NGS-Star                      .....AGGGAAGCAGGCCAACCCUCG..... 1

hsa-mir-3938 MI0016594      AGGAAUUUUUAACCCGAUCACUAGAUUAUCUACAAGGGAUUUUUUUUUUUUUUUAUUUUUAAAAUUCCUUGUAGUAUACCCGGUGGUCAGGUUGGAUUGGCCUCAUG
((((.....((((((((((((((((((((((((((((((((((((((((((((((((((((((((((((.....)))))))))))))))))))))
hsa-miR-3938 MIMAT0018353    .....AAUUCCCUUGUAGUAUAACCCGG..... 44
NGS-Mature                    .....AAUUCCCUUGUAGUAUAACCCGG..... 15
NGS-Star                      .....AGAUUAUCUACAAGGGAUUUU..... 15
NGS-Mature                    .....AAUUCCCUUGUAGUAUAACCCGGU..... 13
NGS-Mature                    .....AAUUCCCUUGUAGUAUAACCCGG..... 3
NGS-Mature                    .....AAUUCCCUUGUAGUAUAACC..... 2
NGS-Star                      .....AGAUUAUCUACAAGGGAUUUU..... 2
NGS-Mature                    .....AAUUCCCUUGUAGUAUAACCC..... 2
NGS-Star                      .....AGAUUAUCUACAAGGGAUU..... 1
NGS-Mature                    .....AAUUCCCUUGUAGUAUAACCCG..... 1
NGS-Mature                    .....AAUUCCCUUGUAGUAUAACCCGG..... 1
NGS-Mature                    .....AAUUCCCUUGUAGUAUAACCCG..... 1

hsa-mir-3919 MI0016425      CCUGAGCACCACUUUACUGAGUCCUUUUGUUCUACUAGUUUGUAGUAGUUCGUAGCAGAGAACAAAGGACUCAGUAAUUGGUUCUCAGG
((((.....((((((((((((((((((((((((((((((((((((((((((((((((((((((((((((.....)))))))))))))))))))))
hsa-miR-3919 MIMAT0018193    .....GCAGAGAACAAAGGACUCAGU..... 50
NGS-Mature                    .....GCAGAGAACAAAGGACUCAGU..... 6
NGS-Mature                    .....AGAGAACAAAGGACUCAGUA..... 6
NGS-Star                      .....UACUGAGUCCUUUGUUCUAC..... 6
NGS-Mature                    .....AGCAGAGAACAAAGGACUCAGU..... 4
NGS-Mature                    .....GCAGAGAACAAAGGACUCAGUA..... 3
NGS-Mature                    .....GCAGAGAACAAAGGACUCAGUA..... 2
NGS-Mature                    .....CAGAGAACAAAGGACUCAGUAAA..... 1
NGS-Mature                    .....AGAGAACAAAGGACUCAGU..... 1
NGS-Star                      .....ACUGAGUCCUUUGUUCUACU..... 1
NGS-Star                      .....ACUGAGUCCUUUGUUCUAC..... 1
NGS-Mature                    .....AGAGAACAAAGGACUCAGUA..... 1
NGS-Mature                    .....GCAGAGAACAAAGGACUCA..... 1
NGS-Mature                    .....GCAGAGAACAAAGGACUCAG..... 1
NGS-Star                      .....UACUGAGUCCUUUGUUCUC..... 1
NGS-Star                      .....UACUGAGUCCUUUGUUCUACU..... 1

hsa-mir-3921 MI0016428      CCUAGCCCGAUACAAGGCAUUAUGGUACUCAAGAGACUAGAAAUUCCUUAAGUCUCUGAGUACCAUAUUGCCUUUGUACUGGGCUAGG
((((.....((((((((((((((((((((((((((((((((((((((((((((((((((((((((((((.....)))))))))))))))))))))
hsa-miR-3921 MIMAT0018196    .....UCUCUGAGUACCAUAUUGCCUUUGU..... 2
NGS-Mature                    .....UCUCUGAGUACCAUAUUGCCUUUG..... 2
NGS-Star                      .....AGGCAUUAUGGUACUCAAGAGACU..... 1

hsa-mir-3937 MI0016593      AGAAGAAUGCCCAACCAGCCUCAGUUCUACAGUCCUUGUUCUAGCAGACACAAACAGGCGGCUAGCAUUGGGGGGUGGAUGGGCAUCUCAAUGGUC
((((.....((((((((((((((((((((((((((((((((((((((((((((((((((((((((((((.....)))))))))))))))))))))
hsa-miR-3937 MIMAT0018352    .....ACAGGCGGCUAGCAUUGGGG..... 11
NGS-Mature                    .....ACAGGCGGCUAGCAUUGGGG..... 8
NGS-Mature                    .....ACAGGCGGCUAGCAU..... 5
NGS-Mature                    .....CAGGCGGCUAGCAUUGGGG..... 2

```

NGS-Mature .....CAACAGGGCGGCUAGCAAUGGGG..... 2  
 NGS-Mature .....CAACAGGGCGGCUAGCAAU..... 1  
 NGS-Mature .....ACAGGGCGGCUAGCAAUGGG..... 1  
 NGS-Mature .....CAACAGGGCGGCUAGCAAUGGGGGG..... 1  
 NGS-Mature .....ACAGGGCGGCUAGCAAUGG..... 1  
 NGS-Mature .....CAACAGGGCGGCUAGCAA..... 1  
 NGS-Star .....CAGUUGCUACAGUCCUGUUG..... 1

hsa-mir-652 MI0003667 ACGAAUAGCCUAUGCACUGCACACCCUAGGAGAGGGUGCCAUUCACUAGACUUAUAUUGAAUGGCCACUAGGGUUGUGCAGUGCACAACCCUACAC  
 .....(((((.....CAACAGGGCGGCUAGCAAUGGGG.....)))))).....  
 hsa-miR-652 MIMAT0003322 .....AAUGGCCCCACUAGGGUUGU.....  
 NGS-Mature .....AAUGGCCCCACUAGGGUUGU..... 4826  
 NGS-Mature .....AAUGGCCCCACUAGGGUUGU..... 4315  
 NGS-Mature .....AAUGGCCCCACUAGGGUUGU..... 2893  
 NGS-Mature .....AAUGGCCCCACUAGGGUU..... 2386  
 NGS-Mature .....AAUGGCCCCACUAGGGUUG..... 755  
 NGS-Star .....ACAACCCUAGGAGAGGGUGCCAU..... 323  
 NGS-Star .....ACAACCCUAGGAGAGGGUGCCAUU..... 247  
 NGS-Star .....ACAACCCUAGGAGAGGGUGCCA..... 150  
 NGS-Mature .....AAUGGCCCCACUAGGGUUGUGCA..... 132  
 NGS-Star .....ACAACCCUAGGAGAGGGUGCCAUUC..... 91  
 NGS-Star .....ACAACCCUAGGAGAGGGUGC..... 59  
 NGS-Mature .....AUGGCCCCACUAGGGUUGU..... 57  
 NGS-Star .....ACAACCCUAGGAGAGGGUGCCAUUCA..... 53  
 NGS-Mature .....AUGGCCCCACUAGGGUUGUGC..... 46  
 NGS-Star .....CAACCCUAGGAGAGGGUGCCAUU..... 43  
 NGS-Star .....CAACCCUAGGAGAGGGUGCCAUUC..... 39  
 NGS-Star .....CAACCCUAGGAGAGGGUGCCAU..... 38  
 NGS-Star .....CAACCCUAGGAGAGGGUGCCA..... 35  
 NGS-Mature .....UGAAUGGCCCCACUAGGGUUGU..... 34  
 NGS-Mature .....AUGGCCCCACUAGGGUUGU..... 24

hsa-mir-101-2 MI0000739 ACUGUCCUUUUUCGGUUUAUCAUGGUACCGAUGCUGUAUAUCUGAAAGGUACAGUACUGUGAUAACUGAAGAUGGGUGU  
 ((.(((.....UACAGUACUGUGAUAACUGAA.....)))))).....  
 hsa-miR-101 MIMAT0000099 .....UACAGUACUGUGAUAACUGAA.....  
 NGS-Mature .....UACAGUACUGUGAUAACUGAA..... 1654767  
 NGS-Mature .....UACAGUACUGUGAUAACUGA..... 935708  
 NGS-Mature .....GUACAGUACUGUGAUAACUGAA..... 858615  
 NGS-Mature .....GUACAGUACUGUGAUAACUGA..... 745776  
 NGS-Mature .....UACAGUACUGUGAUAACU..... 304453  
 NGS-Mature .....GUACAGUACUGUGAUAACU..... 280212  
 NGS-Mature .....UACAGUACUGUGAUAACUGAAG..... 179609  
 NGS-Mature .....UACAGUACUGUGAUAACUG..... 63339  
 NGS-Mature .....GUACAGUACUGUGAUAACUG..... 51916  
 NGS-Mature .....UACAGUACUGUGAUAACUGAAGA..... 32385  
 NGS-Star .....UCGGUUUAUCAUGGUACCGAUGC..... 53  
 NGS-Star .....UCGGUUUAUCAUGGUACCGAUCU..... 33  
 NGS-Star .....CGGUUAUCAUGGUACCGAUCU..... 18  
 NGS-Star .....UCGGUUUAUCAUGGUACCGAUG..... 14  
 NGS-Star .....CGGUUAUCAUGGUACCGAUC..... 8  
 NGS-Star .....CGGUUAUCAUGGUACCGAUCUG..... 6  
 NGS-Star .....CGGUUAUCAUGGUACCGA..... 4  
 NGS-Star .....CGGUUAUCAUGGUACCGAU..... 3  
 NGS-Star .....GGUUUAUCAUGGUACCGAUCU..... 2  
 NGS-Star .....CGGUUAUCAUGGUACCGAUG..... 1

hsa-mir-103-1 MI0000109 UACUGCCCUCGGCUUUUACAGUGCGCCUUGUUGCAUUGGAUCAAGCAGCAUUGUACAGGGCUAUGAAGGCAUUG  
 .....(((((.....AGCAGCAUUGUACAGGGCUAUGA.....)))))).....  
 hsa-miR-103 MIMAT0000101 .....AGCAGCAUUGUACAGGGCUAUGA.....  
 NGS-Mature .....AGCAGCAUUGUACAGGGCUAUGA..... 2346303  
 NGS-Mature .....AGCAGCAUUGUACAGGGCUAU..... 1519226  
 NGS-Mature .....AGCAGCAUUGUACAGGGCUAUG..... 827153  
 NGS-Mature .....AGCAGCAUUGUACAGGGCUA..... 211324  
 NGS-Mature .....AGCAGCAUUGUACAGGGCUAUGAA..... 88707  
 NGS-Mature .....AGCAGCAUUGUACAGGGCU..... 71169  
 NGS-Mature .....AGCAGCAUUGUACAGGGC..... 51938  
 NGS-Mature .....GCAUUGUACAGGGCUAUGA..... 33786  
 NGS-Mature .....GCAGCAUUGUACAGGGCUAUGA..... 10918  
 NGS-Mature .....CAGCAUUGUACAGGGCUAUGA..... 10894  
 NGS-Star .....GGCUUCUUUACAGUGCGUCCUUG..... 86  
 NGS-Star .....GGCUUCUUUACAGUGCGUCCUUGU..... 60  
 NGS-Star .....GGCUUCUUUACAGUGCGUCCUUGU..... 55  
 NGS-Star .....GGCUUCUUUACAGUGCGUCCU..... 25  
 NGS-Star .....GGCUUCUUUACAGUGCGUCCU..... 19  
 NGS-Star .....GGCUUCUUUACAGUGCGUCC..... 10  
 NGS-Star .....GGCUUCUUUACAGUGCGUCC..... 8  
 NGS-Star .....GCUUCUUUACAGUGCGUCCUUGU..... 5  
 NGS-Star .....GGCUUCUUUACAGUGCGUCCUUGU..... 4  
 NGS-Star .....GCUUCUUUACAGUGCGUCCUUG..... 3



|                           |                                                                                                                                                                                 |        |
|---------------------------|---------------------------------------------------------------------------------------------------------------------------------------------------------------------------------|--------|
| NGS-Mature                | .....UUGCAGCUGCCUGGGAGUGAC.....                                                                                                                                                 | 798    |
| NGS-Mature                | .....UUGCAGCUGCCUGGGAGUGA.....                                                                                                                                                  | 639    |
| NGS-Mature                | .....UUGCAGCUGCCUGGGAGUGACUUA.....                                                                                                                                              | 424    |
| NGS-Mature                | .....UUGCAGCUGCCUGGGAGUGACUUC.....                                                                                                                                              | 366    |
| NGS-Mature                | .....UUGCAGCUGCCUGGGAGUGACUU.....                                                                                                                                               | 224    |
| NGS-Mature                | .....UUGCAGCUGCCUGGGAGUGACU.....                                                                                                                                                | 183    |
| NGS-Star                  | .....GGGUCGCUCUAGGCACCGCAGC.....                                                                                                                                                | 16     |
| NGS-Star                  | .....GGGUCGCUCUAGGCACCGCAGCA.....                                                                                                                                               | 9      |
| NGS-Star                  | .....GGGUCGCUCUAGGCACCGCAGCA.....                                                                                                                                               | 7      |
| NGS-Star                  | .....GGGUCGCUCUAGGCACCGCAGC.....                                                                                                                                                | 7      |
| NGS-Star                  | .....GGGUCGCUCUAGGCACCGCAG.....                                                                                                                                                 | 4      |
| NGS-Star                  | .....GGGUCGCUCUAGGCACCGCAG.....                                                                                                                                                 | 2      |
| NGS-Star                  | .....GGGUCGCUCUAGGCACCGCAGCAGCAGUGUGCUGGGAGUGUAGUAGCAGCUGCCUGGGAGUGACUUC.....                                                                                                   | 1      |
| NGS-Star                  | .....GGGUCGCUCUAGGCACCGCAGCAGCAG.....                                                                                                                                           | 1      |
| hsa-mir-1307 MI0006444    | CAUCAAGACCCAGCUGAGUCACUCGACUGCCUACCAAUCUCGACCGGGACCUCGACCGGCCUCGUCUGUGUUGCCAAUCGACUCGGCGUGGCUGCGUGGUAGAUAAGGCGGUAGUACAUACGAAUUUUCAGCUCUUGUUUCUGGUGAC<br>(((((((.....))))))))).. |        |
| hsa-miR-1307 MIMAT0005951 | .....ACUCGGCGUGGCUCGGUCUGG.....                                                                                                                                                 |        |
| NGS-Star                  | .....UCGACCGGACCUCCAGCCGCU.....                                                                                                                                                 | 31801  |
| NGS-Star                  | .....UCGACCGGACCUCCAGCCGCU.....                                                                                                                                                 | 30223  |
| NGS-Star                  | .....UCGACCGGACCUCCAGCCGCU.....                                                                                                                                                 | 13793  |
| NGS-Mature                | .....ACUCGGCGUGGCUCGGUCUGG.....                                                                                                                                                 | 12419  |
| NGS-Mature                | .....ACUCGGCGUGGCUCGGUCUGG.....                                                                                                                                                 | 8819   |
| NGS-Mature                | .....CUCGGCGUGGCUCGGUCUGG.....                                                                                                                                                  | 5354   |
| NGS-Mature                | .....CUCGGCGUGGCUCGGUCUGG.....                                                                                                                                                  | 5301   |
| NGS-Star                  | .....UCGACCGGACCUCCAGCCGCG.....                                                                                                                                                 | 3502   |
| NGS-Mature                | .....ACUCGGCGUGGCUCGGUCUGG.....                                                                                                                                                 | 3144   |
| NGS-Mature                | .....ACUCGGCGUGGCUCGGUCUGG.....                                                                                                                                                 | 2131   |
| NGS-Star                  | .....UCGACCGGACCUCCAGCCGCU.....                                                                                                                                                 | 1327   |
| NGS-Mature                | .....CUCGGCGUGGCUCGGUCUGG.....                                                                                                                                                  | 1327   |
| NGS-Mature                | .....ACUCGGCGUGGCUCGGUCUGG.....                                                                                                                                                 | 1269   |
| NGS-Mature                | .....CUCGGCGUGGCUCGGUCUGG.....                                                                                                                                                  | 855    |
| NGS-Mature                | .....CUCGGCGUGGCUCGGUCUGG.....                                                                                                                                                  | 572    |
| NGS-Star                  | .....UCGACCGGACCUCCAGCCG.....                                                                                                                                                   | 473    |
| NGS-Star                  | .....UCGACCGGACCUCCAGCCG.....                                                                                                                                                   | 448    |
| NGS-Star                  | .....GACCGGACCUCCAGCCG.....                                                                                                                                                     | 441    |
| NGS-Star                  | .....GACCGGACCUCCAGCCG.....                                                                                                                                                     | 415    |
| NGS-Star                  | .....CGACCGGACCUCCAGCCG.....                                                                                                                                                    | 164    |
| hsa-mir-152 MI0000462     | UGUCCCCCGGCCAGGUUCUGUGAUACACUCCGACUCGGCCUCUGAGCAGUCAGUGCAUGACAGAAUUGGCCCGGAAGGACC<br>(((((((.....)))))))))..                                                                    |        |
| hsa-miR-152 MIMAT0000438  | .....UCAGUGCAUGACAGAAUUG.....                                                                                                                                                   |        |
| NGS-Mature                | .....UCAGUGCAUGACAGAAUUG.....                                                                                                                                                   | 147113 |
| NGS-Mature                | .....UCAGUGCAUGACAGAAUUGGG.....                                                                                                                                                 | 63094  |
| NGS-Mature                | .....UCAGUGCAUGACAGAAU.....                                                                                                                                                     | 12831  |
| NGS-Mature                | .....UCAGUGCAUGACAGAAUUG.....                                                                                                                                                   | 5339   |
| NGS-Mature                | .....AGUGCAUGACAGAAUUG.....                                                                                                                                                     | 3104   |
| NGS-Mature                | .....UCAGUGCAUGACAGAAU.....                                                                                                                                                     | 2381   |
| NGS-Mature                | .....AGUGCAUGACAGAAUUGGG.....                                                                                                                                                   | 1140   |
| NGS-Mature                | .....UCAGUGCAUGACAGAAUUGGG.....                                                                                                                                                 | 480    |
| NGS-Mature                | .....AGUGCAUGACAGAAUUG.....                                                                                                                                                     | 121    |
| NGS-Mature                | .....GUCAGUGCAUGACAGAAUUG.....                                                                                                                                                  | 110    |
| NGS-Star                  | .....AGGUUCUGUGAUACACUCCGACU.....                                                                                                                                               | 70     |
| NGS-Star                  | .....CAGGUUCUGUGAUACACUCCGACU.....                                                                                                                                              | 16     |
| NGS-Star                  | .....CAGGUUCUGUGAUACACUCCGA.....                                                                                                                                                | 15     |
| NGS-Star                  | .....AGGUUCUGUGAUACACUCCGA.....                                                                                                                                                 | 10     |
| NGS-Star                  | .....AGGUUCUGUGAUACACUCCGACU.....                                                                                                                                               | 9      |
| NGS-Star                  | .....AGGUUCUGUGAUACACUCCGAC.....                                                                                                                                                | 7      |
| NGS-Star                  | .....CAGGUUCUGUGAUACACUC.....                                                                                                                                                   | 7      |
| NGS-Star                  | .....CAGGUUCUGUGAUACACUCCGAC.....                                                                                                                                               | 6      |
| NGS-Star                  | .....AGGUUCUGUGAUACACUC.....                                                                                                                                                    | 6      |
| NGS-Star                  | .....CAGGUUCUGUGAUACACUC.....                                                                                                                                                   | 4      |
| hsa-mir-210 MI0000286     | ACCCGGCAGUCCUCCAGGCGCAGGGCAGCCCCUGCCACCAGCACAGUCGCGUCCCCAGACCCACUCUGGCGUGACAGCGGCCUGAUCUGGCCUGGGCAGCGGCCACCC<br>(((((((.....)))))))))..                                         |        |
| hsa-miR-210 MIMAT0000267  | .....CUGUGCGUGUGACAGCGGCU.....                                                                                                                                                  |        |
| NGS-Mature                | .....CUGUGCGUGUGACAGCGGCU.....                                                                                                                                                  | 39620  |
| NGS-Mature                | .....CUGUGCGUGUGACAGCGGCU.....                                                                                                                                                  | 6637   |
| NGS-Mature                | .....CUGUGCGUGUGACAGCGGCU.....                                                                                                                                                  | 5315   |
| NGS-Mature                | .....CUGUGCGUGUGACAGCGGCU.....                                                                                                                                                  | 2818   |
| NGS-Mature                | .....ACUGUGCGUGUGACAGCGGCU.....                                                                                                                                                 | 1233   |
| NGS-Mature                | .....CUGUGCGUGUGACAGCGGCU.....                                                                                                                                                  | 1090   |
| NGS-Mature                | .....UGUGCGUGUGACAGCGGCU.....                                                                                                                                                   | 502    |
| NGS-Mature                | .....CUGUGCGUGUGACAGCGGCU.....                                                                                                                                                  | 409    |
| NGS-Mature                | .....CUGUGCGUGUGACAGCGGCU.....                                                                                                                                                  | 381    |
| NGS-Mature                | .....ACUGUGCGUGUGACAGCGGCU.....                                                                                                                                                 | 251    |
| NGS-Star                  | .....AGCCUCCUGCCACCGCACACU.....                                                                                                                                                 | 78     |
| NGS-Star                  | .....AGCCUCCUGCCACCGCACACU.....                                                                                                                                                 | 43     |
| NGS-Star                  | .....AGCCUCCUGCCACCGCACACU.....                                                                                                                                                 | 29     |
| NGS-Star                  | .....AGCCUCCUGCCACCGCACACU.....                                                                                                                                                 | 11     |





|                           |                                                                                                                                                                                                                                 |      |
|---------------------------|---------------------------------------------------------------------------------------------------------------------------------------------------------------------------------------------------------------------------------|------|
| hsa-mir-766 MI0003836     | GCAUCCUCAGGACCCUGGGCUUGGGUGUAGGAGGAUUGGUGUGUCUUUUAUUUGGAUUUGACUCCAGCCCCACAGCCUCAGCCACCCCAGCCAAUUGUCAUAGGAGC<br>((((((.....(((.....(((.....(((.....(((.....(((.....(((.....(((.....(((.....)))..)))..)))..)))..)))..)))..)))..)) |      |
| hsa-miR-766 MIMAT0003888  | .....ACUCCAGCCCCACAGCCUCAGC.....                                                                                                                                                                                                |      |
| NGS-Star                  | .....AGGAGGAUUUGGUGUCUGUCUUU.....                                                                                                                                                                                               | 2336 |
| NGS-Star                  | .....AGGAGGAUUUGGUGUCUGUCUUU.....                                                                                                                                                                                               | 1783 |
| NGS-Star                  | .....AGGAGGAUUUGGUGUCUGUCUUU.....                                                                                                                                                                                               | 1032 |
| NGS-Mature                | .....ACUCCAGCCCCACAGCCUCAG.....                                                                                                                                                                                                 | 812  |
| NGS-Mature                | .....ACUCCAGCCCCACAGCCUCAG.....                                                                                                                                                                                                 | 753  |
| NGS-Star                  | .....AGGAGGAUUUGGUGUCUGU.....                                                                                                                                                                                                   | 689  |
| NGS-Star                  | .....AGGAGGAUUUGGUGUCUGU.....                                                                                                                                                                                                   | 443  |
| NGS-Mature                | .....ACUCCAGCCCCACAGCCUCA.....                                                                                                                                                                                                  | 287  |
| NGS-Star                  | .....AGGAGGAUUUGGUGUCUGUCUUU.....                                                                                                                                                                                               | 243  |
| NGS-Star                  | .....AGGAGGAUUUGGUGUCUGUCUUUCA.....                                                                                                                                                                                             | 234  |
| NGS-Star                  | .....GGAGGAUUUGGUGUCUGUCUUU.....                                                                                                                                                                                                | 103  |
| NGS-Star                  | .....GGAGGAUUUGGUGUCUGUCUUU.....                                                                                                                                                                                                | 78   |
| NGS-Mature                | .....CUCCAGCCCCACAGCCUCAG.....                                                                                                                                                                                                  | 47   |
| NGS-Star                  | .....GGAGGAUUUGGUGUCUGUCUUU.....                                                                                                                                                                                                | 33   |
| NGS-Mature                | .....ACUCCAGCCCCACAGCCUCAGCC.....                                                                                                                                                                                               | 31   |
| NGS-Mature                | .....ACUCCAGCCCCACAGCCUC.....                                                                                                                                                                                                   | 29   |
| NGS-Mature                | .....CUCCAGCCCCACAGCCUCAG.....                                                                                                                                                                                                  | 24   |
| NGS-Mature                | .....CUCCAGCCCCACAGCCUCA.....                                                                                                                                                                                                   | 8    |
| NGS-Mature                | .....ACUCCAGCCCCACAGCCU.....                                                                                                                                                                                                    | 7    |
| NGS-Mature                | .....UCCAGCCCCACAGCCUCAG.....                                                                                                                                                                                                   | 3    |
| hsa-mir-1285-1 MI0006346  | UGUAGAGAUAGGAUCUCACUUUGUGGCCAGGUCUGUCUAAACUCCUGGUCUGGGCAACAAAGUGAGACCUUUAUCUCUACAAG<br>(((.....(((.....(((.....(((.....(((.....(((.....(((.....(((.....(((.....)))..)))..)))..)))..)))..)))..)))..))                            |      |
| hsa-miR-1285 MIMAT0005876 | .....UCUGGGCAACAAGUGAGACCU.....                                                                                                                                                                                                 |      |
| NGS-Mature                | .....UCUGGGCAACAAGUGAGACCU.....                                                                                                                                                                                                 | 1375 |
| NGS-Mature                | .....UCUGGGCAACAAGUGAGACCUU.....                                                                                                                                                                                                | 862  |
| NGS-Mature                | .....UCUGGGCAACAAGUGAGAC.....                                                                                                                                                                                                   | 419  |
| NGS-Mature                | .....UCUGGGCAACAAGUGAGACC.....                                                                                                                                                                                                  | 293  |
| NGS-Mature                | .....UCUGGGCAACAAGUGAGACCUUA.....                                                                                                                                                                                               | 177  |
| NGS-Mature                | .....UCUGGGCAACAAGUGAGA.....                                                                                                                                                                                                    | 123  |
| NGS-Mature                | .....UCUGGGCAACAAGUGAGACCUUUA.....                                                                                                                                                                                              | 53   |
| NGS-Mature                | .....CUGGGCAACAAGUGAGACCU.....                                                                                                                                                                                                  | 52   |
| NGS-Star                  | .....AUCUCACUUUGUUGCCAGCC.....                                                                                                                                                                                                  | 32   |
| NGS-Star                  | .....AUCUCACUUUGUUGCCAGG.....                                                                                                                                                                                                   | 32   |
| NGS-Star                  | .....AUCUCACUUUGUUGCCAGGU.....                                                                                                                                                                                                  | 30   |
| NGS-Mature                | .....UCUGGGCAACAAGUGAG.....                                                                                                                                                                                                     | 25   |
| NGS-Mature                | .....CUGGGCAACAAGUGAGACCUU.....                                                                                                                                                                                                 | 15   |
| NGS-Star                  | .....AUCUCACUUUGUUGCCAG.....                                                                                                                                                                                                    | 15   |
| NGS-Star                  | .....CAGCCUGGUCUCAAAUC.....                                                                                                                                                                                                     | 7    |
| NGS-Star                  | .....UGUUGCCAGGUCUGUC.....                                                                                                                                                                                                      | 7    |
| NGS-Star                  | .....AGCCUGGUCUCAAAUCU.....                                                                                                                                                                                                     | 7    |
| NGS-Star                  | .....GUAUCACUUUGUUGCCAG.....                                                                                                                                                                                                    | 5    |
| NGS-Star                  | .....UGUUGCCAGGUCUGUC.....                                                                                                                                                                                                      | 5    |
| NGS-Star                  | .....AGCCUGGUCUCAAAUCUG.....                                                                                                                                                                                                    | 4    |
| hsa-mir-1180 MI0006273    | GCUGCUGGACCCACCCGGCCGGGAUAGUGCCUUCGUGUUGUUCGCGUCGCGUGGGUGUGUCGGCGGC<br>(((.....(((.....(((.....(((.....(((.....(((.....(((.....(((.....)))..)))..)))..)))..)))..)))..)))..))                                                    |      |
| hsa-miR-1180 MIMAT0005825 | .....UUUCCGGCUCGCGUGGGUGUG.....                                                                                                                                                                                                 |      |
| NGS-Mature                | .....UUUCCGGCUCGCGUGGGUGUG.....                                                                                                                                                                                                 | 1638 |
| NGS-Mature                | .....UUUCCGGCUCGCGUGGGUGUG.....                                                                                                                                                                                                 | 409  |
| NGS-Mature                | .....UUUCCGGCUCGCGUGGGUGUG.....                                                                                                                                                                                                 | 196  |
| NGS-Star                  | .....GGACCCACCCGGCCGGGAU.....                                                                                                                                                                                                   | 90   |
| NGS-Mature                | .....UUUCCGGCUCGCGUGGGUGUG.....                                                                                                                                                                                                 | 81   |
| NGS-Mature                | .....UUUCCGGCUCGCGUGGGUG.....                                                                                                                                                                                                   | 74   |
| NGS-Mature                | .....UUUCCGGCUCGCGUGGGUG.....                                                                                                                                                                                                   | 60   |
| NGS-Star                  | .....GGACCCACCCGGCCGGGAUA.....                                                                                                                                                                                                  | 36   |
| NGS-Mature                | .....UUUCCGGCUCGCGUGGGUGUG.....                                                                                                                                                                                                 | 21   |
| NGS-Mature                | .....UUUCCGGCUCGCGUGGGUGUG.....                                                                                                                                                                                                 | 10   |
| NGS-Mature                | .....UUUCCGGCUCGCGUGGGUGUGCG.....                                                                                                                                                                                               | 10   |
| NGS-Star                  | .....GGACCCACCCGGCCGGGA.....                                                                                                                                                                                                    | 8    |
| NGS-Mature                | .....UUUCCGGCUCGCGUGGGUGUGCG.....                                                                                                                                                                                               | 4    |
| NGS-Star                  | .....GACCCACCCGGCCGGGAU.....                                                                                                                                                                                                    | 2    |
| NGS-Star                  | .....GGACCCACCCGGCCGGGAUAG.....                                                                                                                                                                                                 | 2    |
| NGS-Star                  | .....GGACCCACCCGGCCGGGAUAGUGUC.....                                                                                                                                                                                             | 1    |
| NGS-Star                  | .....ACCCACCCGGCCGGGAUA.....                                                                                                                                                                                                    | 1    |
| hsa-mir-1306 MI0006443    | GUGAGCAGUCUCCACCACCUCUCCUGCAAACGUCAGGUGGUCAGAGGUAAUGGACGUUGGCUCUGGUGGUGAUGGACAGUCCGA<br>(((.....(((.....(((.....(((.....(((.....(((.....(((.....(((.....)))..)))..)))..)))..)))..)))..)))..))                                   |      |
| hsa-miR-1306 MIMAT0005950 | .....ACGUUGGCCUCUGGUGGUG.....                                                                                                                                                                                                   |      |
| NGS-Star                  | .....CCACCUCUCCUGCAAACGUCCA.....                                                                                                                                                                                                | 733  |
| NGS-Mature                | .....ACGUUGGCCUCUGGUGGUGAUG.....                                                                                                                                                                                                | 558  |
| NGS-Mature                | .....ACGUUGGCCUCUGGUGGUGAU.....                                                                                                                                                                                                 | 334  |
| NGS-Star                  | .....CCACCUCUCCUGCAAACGUCC.....                                                                                                                                                                                                 | 311  |
| NGS-Mature                | .....GACGUUGGCCUCUGGUGGUGAU.....                                                                                                                                                                                                | 119  |
| NGS-Star                  | .....CCACCUCUCCUGCAAACGUC.....                                                                                                                                                                                                  | 96   |
| NGS-Mature                | .....GACGUUGGCCUCUGGUGGUGAUG.....                                                                                                                                                                                               | 91   |
| NGS-Mature                | .....ACGUUGGCCUCUGGUGGUG.....                                                                                                                                                                                                   | 52   |





NGS-Mature ..... UGGAUGUAAAAGUAUGUUAUUU..... 299  
NGS-Mature ..... GAAUGUAAAAGUAUGUAU..... 146  
NGS-Mature ..... GGAAUGUAAAAGUAUGUUAUU..... 47  
NGS-Star ..... ACAUACUUCUUUAUGUACCCAUA..... 4  
NGS-Star ..... ACAUACUUCUUUAUGUACCCA..... 2

hsa-mir-375 MI0000783 CCCC GCGACGAGCCUUCGCACAACCGGACCUAGGCUUUUGUUCGUUCGGCUCGCGUGAGGC  
.(((((((.....(((((.....)))))))).)))).  
.....UUUGUUCGUUCGGCUCGCGUGA.....  
NGS-Mature .....UUUGUUCGUUCGGCUCGCGUGA..... 12756  
NGS-Mature .....UUUGUUCGUUCGGCUCGCGUG..... 9381  
NGS-Mature .....UUUGUUCGUUCGGCUCGCGU..... 2750  
NGS-Mature .....UUUGUUCGUUCGGCUCGCG..... 420  
NGS-Mature .....UUUGUUCGUUCGGCUCGCG..... 404  
NGS-Mature .....UUUGUUCGUUCGGCUCGCG..... 235  
NGS-Mature .....UUUGUUCGUUCGGCUCGCGUGA..... 228  
NGS-Mature .....UUUGUUCGUUCGGCUCGCGUG..... 190  
NGS-Mature .....UUUGUUCGUUCGGCUCGCGUGA..... 125  
NGS-Mature .....UUUGUUCGUUCGGCUCGCGU..... 87  
NGS-Star .....CGAGCCUUCGCACAACCG..... 1  
NGS-Star .....GCGACGAGCCUUCGCACAACCG..... 1  
NGS-Star .....GCGACGAGCCUUCGCACAAC..... 1  
NGS-Star .....GCGACGAGCCUUCGCACAAC..... 1

hsa-mir-95 MI0000097 AACACAGUGGGCACUCAAAUAAUGUCUGUUGAAUUGAAUUGCGUUACAUAACGGGUUUUAUUGAGCACCCACUCUGUG  
.(((((((.....(((((.....)))))))).)))).  
.....UUCAACGGGUUUUAUUGAGCA.....  
NGS-Mature .....UUCAACGGGUUUUAUUGAGCA..... 13768  
NGS-Mature .....UUCAACGGGUUUUAUUGAG..... 4990  
NGS-Mature .....UUCAACGGGUUUUAUUGA..... 3072  
NGS-Mature .....UUCAACGGGUUUUAUUG..... 2978  
NGS-Mature .....UUCAACGGGUUUUAUUGAGC..... 2307  
NGS-Mature .....UCAACGGGUUUUAUUGAGCA..... 461  
NGS-Mature .....AACGGGUUUUAUUGAGCA..... 264  
NGS-Star .....UCAAUAAAUGUCUGUUGAAUU..... 110  
NGS-Mature .....UCAACGGGUUUUAUUGA..... 109  
NGS-Mature .....UCAACGGGUUUUAUUGAG..... 74  
NGS-Star .....CUCAAUAAAUGUCUGUUGAAUU..... 64  
NGS-Mature .....UCAACGGGUUUUAUUGAGC..... 57  
NGS-Star .....CUCAAUAAAUGUCUGUUGAAU..... 26  
NGS-Star .....UCAAUAAAUGUCUGUUGAAU..... 25  
NGS-Star .....ACUCAUAAAUGUCUGUUGAA..... 23  
NGS-Star .....ACUCAUAAAUGUCUGUUGA..... 12  
NGS-Star .....UCAAUAAAUGUCUGUUGAAUUG..... 8  
NGS-Star .....CUCAAUAAAUGUCUGUUGAA..... 7  
NGS-Star .....ACUCAUAAAUGUCUGUUGAAU..... 5  
NGS-Star .....CUCAAUAAAUGUCUGUUGA..... 4

hsa-mir-941-1 MI0005763 CACGGAAGAGGACACACCCGGCUGUGGACAUUGUCCAGGGCCCGGGACAGCGCCACGGGAAGAGGACGACCCCGGUGUGCACAUGGCCAGGGCCCGGGACAGCGCCACGG  
.(((((((.....(((((.....)))))))).)))).  
.....CACCCGGCUGUGGACAUUGGC..... 7150  
NGS-Mature .....CACCCGGCUGUGGACAUUGGC..... 1522  
NGS-Mature .....CACCCGGCUGUGGACAUUG..... 422  
NGS-Mature .....CACCCGGCUGUGGACAUUG..... 155  
NGS-Star .....ACAUGUCCAGGGCCCGGGACAGCG..... 125  
NGS-Star .....CACCCGGCUGUGGACAUUGGC..... 78  
NGS-Mature .....ACCCGGCUGUGGACAUUGGC..... 56  
NGS-Mature .....CACCCGGCUGUGGACAU..... 30  
NGS-Mature .....CACCCGGCUGUGGACAUUGGCC..... 25  
NGS-Star .....ACAUGUCCAGGGCCCGGGACAGC..... 16  
NGS-Mature .....CACCCGGCUGUGGACAUUGGCC..... 12  
NGS-Mature .....CCACGGAAGAGGACG..... 11  
NGS-Mature .....ACCCGGCUGUGGACAUUGGC..... 10  
NGS-Star .....UGUGCCAGGGCCCGGGACAGCG..... 8  
NGS-Star .....CAUGUCCAGGGCCCGGGACAGCG..... 8  
NGS-Star .....CACCCGGCUGUGGACAUUG..... 8  
NGS-Star .....ACAUGUCCAGGGCCCGGGGA..... 6  
NGS-Star .....CACCCGGCUGUGGACAUUG..... 6  
NGS-Star .....ACAUGUCCAGGGCCCGGGACAG..... 6  
NGS-Star .....ACAUGUCCAGGGCCCGGGACA..... 4

hsa-mir-1277 MI0006419 ACCUCCAAAUAUAUAUAUAUGUACGUUGUGUAUAUAAAUGUAUACGUAGAUAUAUAUGUAUUUUUGGUGGGUUU  
.(((((((.....(((((.....)))))))).)))).  
.....UACGUAGAUAUAUAUGUAUUUU..... 4789  
NGS-Mature .....UACGUAGAUAUAUAUGUAUUUU..... 1160  
NGS-Star .....UAUAUAUAUAUAUGUACGUUAU..... 643  
NGS-Star .....UAUAUAUAUAUAUGUACGUAG..... 602  
NGS-Mature .....UACGUAGAUAUAUAUGUAUU..... 404

|            |                                     |     |
|------------|-------------------------------------|-----|
| NGS-Mature | .....UACGUAGAUUAUUAUGUAU.....       | 154 |
| NGS-Star   | .....UAUAUAUAUAUAUGUACGU.....       | 131 |
| NGS-Star   | .....UAUAUAUAUAUAUGUACGU.....       | 106 |
| NGS-Mature | .....CGUAGAUUAUAUGUAUUUU.....       | 105 |
| NGS-Mature | .....UACGUAGAUUAUAUGUAUUUU.....     | 79  |
| NGS-Star   | .....UAUAUAUAUAUAUGUACGUAGUGUA..... | 65  |
| NGS-Mature | .....AUACGUAGAUUAUAUGUAUUUU.....    | 64  |
| NGS-Mature | .....ACGUAGAUUAUAUGUAUUUU.....      | 53  |
| NGS-Mature | .....CGUAGAUUAUAUGUAUUUU.....       | 46  |
| NGS-Star   | .....UAUAUAUAUAUAUGUACGU.....       | 45  |
| NGS-Mature | .....UACGUAGAUUAUAUGUA.....         | 42  |
| NGS-Star   | .....UAUAUAUAUAUAUGUACGUAGUGU.....  | 31  |
| NGS-Star   | .....UAUAUAUAUAUGUACGUAG.....       | 16  |
| NGS-Star   | .....UAUAUAUAUAUAUGUACG.....        | 12  |
| NGS-Star   | .....UAUAUAUAUAUGUACGU.....         | 10  |

|                           |                                                                                            |     |
|---------------------------|--------------------------------------------------------------------------------------------|-----|
| hsa-mir-133a-1 MI0000450  | ACAAUGCCUUUGCUAGAGCUGGUAUAAAUGGAACCAAUCCGCCUUCUAAUGGAUUUGGUCCCCUUAACACCAGCUGUAGCUAUGCAUUGA |     |
| hsa-miR-133a MIMAT0000427 | .....UUUGGCCUUUAACACCAGCUG.....                                                            |     |
| NGS-Mature                | .....UUUGGCCUUUAACACCAGCUG.....                                                            | 276 |
| NGS-Mature                | .....UUUGGCCUUUAACACCAGCUG.....                                                            | 222 |
| NGS-Mature                | .....UUUGGCCUUUAACACCAGCUG.....                                                            | 83  |
| NGS-Star                  | .....AGCUGGUAUAAAUGGAACCAAU.....                                                           | 81  |
| NGS-Mature                | .....UUUGGCCUUUAACACCAGCUG.....                                                            | 53  |
| NGS-Mature                | .....UUUGGCCUUUAACACCAGCUG.....                                                            | 40  |
| NGS-Mature                | .....UUUGGCCUUUAACACCAGC.....                                                              | 38  |
| NGS-Mature                | .....UGGCCUUUAACACCAGCUG.....                                                              | 30  |
| NGS-Star                  | .....AGCUGGUAUAAAUGGAACCAA.....                                                            | 26  |
| NGS-Star                  | .....AGCUGGUAUAAAUGGAACCAA.....                                                            | 23  |
| NGS-Mature                | .....UUUGGCCUUUAACACCAGCUG.....                                                            | 16  |
| NGS-Star                  | .....GCUGGUAUAAAUGGAACCAAU.....                                                            | 12  |
| NGS-Mature                | .....UUUGGCCUUUAACACCAGC.....                                                              | 9   |
| NGS-Star                  | .....AGCUGGUAUAAAUGGAACCAAU.....                                                           | 9   |
| NGS-Star                  | .....GCUGGUAUAAAUGGAACCAAU.....                                                            | 8   |
| NGS-Star                  | .....AGCUGGUAUAAAUGGAACCAA.....                                                            | 6   |
| NGS-Mature                | .....UUUGGCCUUUAACACCAG.....                                                               | 6   |
| NGS-Star                  | .....GAGCUGGUAUAAAUGGAACCAA.....                                                           | 3   |
| NGS-Star                  | .....GCUGGUAUAAAUGGAACCAA.....                                                             | 1   |
| NGS-Star                  | .....AGCUGGUAUAAAUGGAACCAA.....                                                            | 1   |

|                           |                                                                                  |     |
|---------------------------|----------------------------------------------------------------------------------|-----|
| hsa-mir-133a-2 MI0000451  | GGGAGCCAAUUGCUAGAGCUGGUAUAAAUGGAACCAAUCCAGUCCUUAACACCAGCUGUAGCUAUGCAUUGAUGGCCGGC |     |
| hsa-miR-133a MIMAT0000427 | .....UUUGGCCUUUAACACCAGCUG.....                                                  |     |
| NGS-Mature                | .....UUUGGCCUUUAACACCAGCUG.....                                                  | 276 |
| NGS-Mature                | .....UUUGGCCUUUAACACCAGCUG.....                                                  | 222 |
| NGS-Mature                | .....UUUGGCCUUUAACACCAGCUG.....                                                  | 83  |
| NGS-Star                  | .....AGCUGGUAUAAAUGGAACCAAU.....                                                 | 81  |
| NGS-Mature                | .....UUUGGCCUUUAACACCAGCUG.....                                                  | 53  |
| NGS-Mature                | .....UUUGGCCUUUAACACCAGCUG.....                                                  | 40  |
| NGS-Mature                | .....UUUGGCCUUUAACACCAGC.....                                                    | 38  |
| NGS-Mature                | .....UGGCCUUUAACACCAGCUG.....                                                    | 30  |
| NGS-Star                  | .....AGCUGGUAUAAAUGGAACCAA.....                                                  | 26  |
| NGS-Star                  | .....AGCUGGUAUAAAUGGAACCAA.....                                                  | 23  |
| NGS-Mature                | .....UUUGGCCUUUAACACCAGCUG.....                                                  | 16  |
| NGS-Star                  | .....GCUGGUAUAAAUGGAACCAAU.....                                                  | 12  |
| NGS-Mature                | .....UUUGGCCUUUAACACCAGC.....                                                    | 9   |
| NGS-Star                  | .....AGCUGGUAUAAAUGGAACCAAU.....                                                 | 9   |
| NGS-Star                  | .....GCUGGUAUAAAUGGAACCAAU.....                                                  | 8   |
| NGS-Star                  | .....AGCUGGUAUAAAUGGAACCAA.....                                                  | 6   |
| NGS-Mature                | .....UUUGGCCUUUAACACCAG.....                                                     | 6   |
| NGS-Star                  | .....GAGCUGGUAUAAAUGGAACCAA.....                                                 | 3   |
| NGS-Star                  | .....UGGUAUAAAUGGAACCAAU.....                                                    | 1   |
| NGS-Star                  | .....UCGACUGUCCAAUGGAUUU.....                                                    | 1   |

|                          |                                                                                                        |      |
|--------------------------|--------------------------------------------------------------------------------------------------------|------|
| hsa-mir-203 MI0000283    | GUGUUGGGACUCGCGCGCUGGGUCCAGUGGUUCUUAACAGUUAACAGUUCUGUAGCGCAAUUGUAAAUGUUUAGGACCACUAGACCCGGCGCGCGACAGCGA |      |
| hsa-miR-203 MIMAT0000264 | .....GUGAAAUGUUUAGGACCACUAG.....                                                                       |      |
| NGS-Mature               | .....GUGAAAUGUUUAGGACCACUAG.....                                                                       | 4806 |
| NGS-Mature               | .....UGAAAUGUUUAGGACCACUAG.....                                                                        | 2751 |
| NGS-Mature               | .....GUGAAAUGUUUAGGACCACU.....                                                                         | 727  |
| NGS-Mature               | .....GUGAAAUGUUUAGGACCACUAGA.....                                                                      | 716  |
| NGS-Mature               | .....UGAAAUGUUUAGGACCACUAGA.....                                                                       | 600  |
| NGS-Mature               | .....GUGAAAUGUUUAGGACCACUA.....                                                                        | 501  |
| NGS-Mature               | .....UGAAAUGUUUAGGACCACU.....                                                                          | 464  |
| NGS-Mature               | .....GUGAAAUGUUUAGGACCAC.....                                                                          | 194  |
| NGS-Mature               | .....UGAAAUGUUUAGGACCACUA.....                                                                         | 168  |
| NGS-Star                 | .....AGUGGUUCUUAACAGUUAACA.....                                                                        | 135  |
| NGS-Mature               | .....AAUGUUUAGGACCACUAG.....                                                                           | 113  |
| NGS-Star                 | .....AGUGGUUCUUAACAGUUAACA.....                                                                        | 21   |
| NGS-Star                 | .....AGUGGUUCUUAACAGUUAACA.....                                                                        | 19   |



hsa-miR-1249 MIMAT0005901 .....ACGCCCUUCCCCCUUCUUA....  
NGS-Mature .....ACGCCCUUCCCCCUUCUUA.... 418  
NGS-Mature .....ACGCCCUUCCCCCUUCUUC.... 193  
NGS-Star .AGGAGGGAGGAGAUGGGCCAAGUUC..... 126  
NGS-Star .AGGAGGGAGGAGAUGGGCCAAGUU..... 119  
NGS-Mature .....ACGCCCUUCCCCCUUCUU..... 85  
NGS-Mature .....ACGCCCUUCCCCCUUCU..... 68  
NGS-Star .AGGAGGGAGGAGAUGGGCCAAG..... 27  
NGS-Star .AGGAGGGAGGAGAUGGGCCAAGU..... 21  
NGS-Mature .....ACGCCCUUCCCCCUUC..... 17  
NGS-Mature .AACGCCCUUCCCCCUUCUUA.... 10  
NGS-Star .AGGAGGGAGGAGAUGGGCCAA..... 10  
NGS-Star .AGGAGGGAGGAGAUGGGCCA..... 7  
NGS-Mature .....ACGCCCUUCCCCCUUCUUCAC... 5  
NGS-Star .AGGAGGGAGGAGAUGGGCC..... 4  
NGS-Star .AGGAGGGAGGAGAUGGGCCAAGUUC..... 4  
NGS-Mature .....GCCCUUCCCCCUUCUUA.... 4  
NGS-Mature .AACGCCCUUCCCCCUUCUU..... 3  
NGS-Mature .....CGCCCUUCCCCCUUCUUA.... 3  
NGS-Star .....AGGAGGAGAUGGGCCAAGUCCUCUGGCUAGAACGCCCUUCCCCCUUC..... 1

hsa-mir-153-1 MI0000463 CUCACAGCUGCCAGUGUCAUUUUUGUGAUCUGCAGCUAGUAUUCUCACUCCAGUUGCAUAGUCACAAAAGUGAUCAUUGGCAGGUGUGGC  
(.....((.....)).....)).....).  
.....UUGCAUAGUCACAAAAGUGAUC.....  
.....UUGCAUAGUCACAAAAGUGAUA..... 1812  
.....UUGCAUAGUCACAAAAGUGAUC..... 1311  
.....UUGCAUAGUCACAAAAGUGAUCAU..... 1250  
.....UUGCAUAGUCACAAAAGUGAU..... 598  
.....UUGCAUAGUCACAAAAGUGA..... 362  
.....UUGCAUAGUCACAAAAGUG..... 192  
.....GUCAUUUUUGUGAUCUGCAGCU..... 82  
.....UAGUCACAAAAGUGAUCAU..... 76  
.....UGCAUAGUCACAAAAGUGAUCAU..... 50  
.....UUGCAUAGUCACAAAAGUGAUCAU..... 40  
.....AUAGUCACAAAAGUGAUC..... 36  
.....GUCAUUUUUGUGAUCUGCAGC..... 21  
.....GUCAUUUUUGUGAUCUGCA..... 3  
.....GUCAUUUUUGUGAUCUGCAG..... 2  
.....AUUUUUUGUGAUCUGCAGCU..... 1  
.....GUCAUUUUUGUGAUCUGCAGCUA..... 1

hsa-mir-153-2 MI0000464 AGCGGUGGCCAGUGUCAUUUUUGUGAUGUUGCAGCUAGUAUUGAGCCAGUUGCAUAGUCACAAAAGUGAUCAUUGGAAACUGUG  
(.....((.....)).....)).....).  
.....UUGCAUAGUCACAAAAGUGAUC.....  
.....UUGCAUAGUCACAAAAGUGAUC..... 1812  
.....UUGCAUAGUCACAAAAGUGAUC..... 1311  
.....UUGCAUAGUCACAAAAGUGAUCAU..... 1250  
.....UUGCAUAGUCACAAAAGUGAU..... 598  
.....UUGCAUAGUCACAAAAGUGA..... 362  
.....UUGCAUAGUCACAAAAGUG..... 192  
.....GUCAUUUUUGUGAUGUUGCAGCU..... 94  
.....UAGUCACAAAAGUGAUCAU..... 76  
.....UGCAUAGUCACAAAAGUGAUCAU..... 50  
.....GUCAUUUUUGUGAUGUUGCAGC..... 44  
.....UUGCAUAGUCACAAAAGUGAUCAU..... 40  
.....AUAGUCACAAAAGUGAUC..... 36  
.....GUCAUUUUUGUGAUGUUGCAG..... 18  
.....GUCAUUUUUGUGAUGUUGCA..... 7  
.....GUCAUUUUUGUGAUGUUGCAGCUA..... 6  
.....GUCAUUUUUGUGAUGUUGC..... 1  
.....UUUUUGUGAUGUUGCAGCUAGU..... 1

hsa-mir-494 MI0003134 GAUACUCGAAGGAGAGGUUGUCCGUGUUCUCUCUUUUUUUGAUGAAACUAACCGGGAAACCUCUUUUUUAGUAUC  
(.....((.....)).....)).....).  
.....UGAAACAUAACCGGGAAACCUC.....  
.....UGAAACAUAACCGGGAAACCUC..... 6855  
.....UGAAACAUAACCGGGAAACCUC..... 589  
.....UGAAACAUAACCGGGAAACCUC..... 392  
.....GAAACAUAACCGGGAAACCUC..... 234  
.....UGAAACAUAACCGGGAAACCUCU..... 132  
.....UGAAACAUAACCGGGAAAC..... 125  
.....UGAAACAUAACCGGGAAACC..... 125  
.....AAACAUAACCGGGAAACCUC..... 104  
.....AAACAUAACCGGGAAACCUCUU..... 60  
.....GAAACAUAACCGGGAAACCUC..... 33  
.....AGGUUGUCCGUGUUGUCUCUC..... 22  
.....AGGUUGUCCGUGUUGUCUCU..... 12  
.....AGAGGUUGUCCGUGUUGUCU..... 8  
.....AGAGGUUGUCCGUGUUGUCU..... 7  
.....AGAGGUUGUCCGUGUUGUCU..... 6

hsa-miR-494 MIMAT0002816 .....UGAAACAUAACCGGGAAACCUC.....  
NGS-Mature .....UGAAACAUAACCGGGAAACCUC..... 6855  
NGS-Mature .....UGAAACAUAACCGGGAAACCUC..... 589  
NGS-Mature .....UGAAACAUAACCGGGAAACCUC..... 392  
NGS-Mature .....GAAACAUAACCGGGAAACCUC..... 234  
NGS-Mature .....UGAAACAUAACCGGGAAACCUCU..... 132  
NGS-Mature .....UGAAACAUAACCGGGAAAC..... 125  
NGS-Mature .....UGAAACAUAACCGGGAAACC..... 125  
NGS-Mature .....AAACAUAACCGGGAAACCUC..... 104  
NGS-Mature .....AAACAUAACCGGGAAACCUCUU..... 60  
NGS-Mature .....GAAACAUAACCGGGAAACCUC..... 33  
NGS-Star .....AGGUUGUCCGUGUUGUCUCUC..... 22  
NGS-Star .....AGGUUGUCCGUGUUGUCUCU..... 12  
NGS-Star .....AGAGGUUGUCCGUGUUGUCU..... 8  
NGS-Star .....AGAGGUUGUCCGUGUUGUCU..... 7  
NGS-Star .....AGAGGUUGUCCGUGUUGUCU..... 6

```

NGS-Star             .....GAGAGUUUCGGUGUUGUCUU..... 3
NGS-Star             .....AGGUUUCGGUGUUGUCUU..... 2
NGS-Star             .....GGUUUCGGUGUUGUCUC..... 2
NGS-Star             .....GAGAGUUUCGGUGUUGUCUU..... 2
NGS-Star             .....AGAGUUUCGGUGUUGUCUU..... 1

hsa-mir-548e MI006344      UUAUUAGGUUGGUACAAAAGCAAUCGCGUUUUUUGCUUAUUACUUUAAAAGGCAAAAACUGAGACUACUUUUGCACCAACCGAUAGAA
(((.....(((.....((.....))).....)).....)).....)).....

hsa-miR-548e MIMAT005874      .....AAAAACUGAGACUACUUUUGCA..... 6121
NGS-Mature           .....AAAAACUGAGACUACUUUUGCA..... 1075
NGS-Mature           .....AAAAACUGAGACUACUUUUGC..... 697
NGS-Mature           .....AAAAACUGAGACUACUUUU..... 171
NGS-Mature           .....AAAAACUGAGACUACUUUUGCA..... 163
NGS-Star             .....CAAAGCAAUCGCGUUUUUUGC..... 119
NGS-Mature           .....CAAACUGAGACUACUUUUGCA..... 108
NGS-Star             .....CAAAGCAAUCGCGUUUUUG..... 101
NGS-Mature           .....CAAACUGAGACUACUUUUGC..... 86
NGS-Mature           .....CAAACUGAGACUACUUUUG..... 63
NGS-Star             .....AAAAGCAAUCGCGUUUUUUG..... 42
NGS-Star             .....CAAAGCAAUCGCGUUUUUU..... 38
NGS-Star             .....AAAAGCAAUCGCGUUUUUGCU..... 30
NGS-Mature           .....AAAACUGAGACUACUUUUGC..... 24
NGS-Star             .....AAAAGCAAUCGCGUUUUUU..... 23
NGS-Star             .....AAAAGCAAUCGCGUUUUU..... 20
NGS-Star             .....CAAAGCAAUCGCGUUUUUGCU..... 16
NGS-Mature           .....AACUGAGACUACUUUUGCACA..... 15
NGS-Star             .....CAAAGCAAUCGCGUUUUU..... 15
NGS-Star             .....AAAAGCAAUCGCGUUUUUUGC..... 10

hsa-mir-579 MI003586      CAUUAUUAGGUUAUUGCAAAAAGUAUUCGCGUUUUUGCCAGUAGCAUUUUAUUAAAUAUUUUUGGUUAUAAAACCGGAUUUUUUUGCAUCAAC
(((.....(((.....((.....))).....)).....)).....)).....)).....)).....)).....)).....)).....)).....)).....

hsa-miR-579 MIMAT003244      .....UUCAUUUUGGUUAUAAAACCGGAUU..... 121
NGS-Mature           .....UUCAUUUUGGUUAUAAAACCGGAUU..... 49
NGS-Star             .....UCGCGUUUUGGCCAGAUGACG..... 43
NGS-Star             .....UCGCGUUUUGGCCAGAUGCAGU..... 41
NGS-Star             .....UCGCGUUUUGGCCAGAUGACGA..... 34
NGS-Star             .....UCGCGUUUUGGCCAGAUGAC..... 22
NGS-Mature           .....UUCAUUUUGGUUAUAAAACCGGAU..... 22
NGS-Star             .....UCGCGUUUUGGCCAGAUGA..... 12
NGS-Star             .....AUCGCGUUUUGGCCAGAUGAC..... 11
NGS-Star             .....AUCGCGUUUUGGCCAGAUGA..... 11
NGS-Star             .....AAUCGCGUUUUGGCCAGAUGA..... 10
NGS-Mature           .....AUUCAUUUGGUUAUAAAACCGGA..... 10
NGS-Mature           .....AUUCAUUUGGUUAUAAAACCGGAU..... 10
NGS-Mature           .....UCAUUUGGUUAUAAAACCGGAUU..... 10
NGS-Mature           .....UCAUUUGGUUAUAAAACCGGAU..... 6
NGS-Star             .....GUAUUCGCGUUUUGGCCAGAU..... 5
NGS-Mature           .....UCAUUUGGUUAUAAAACCG..... 3
NGS-Mature           .....CAUUUGGUUAUAAAACCGGAUU..... 3
NGS-Mature           .....UCAUUUGGUUAUAAAACCGGA..... 3
NGS-Mature           .....UCAUUUGGUUAUAAAACCGC..... 2

hsa-mir-328 MI000804      UGGAGUGGGGGGCGAGGGGCGACAGGAGAAAGUGCAUACAGCCCCUGGCCUCUCUGCCCUUCCGCCUCCCG
((.....(((.....((.....))).....)).....)).....)).....)).....)).....)).....)).....)).....)).....

hsa-miR-328 MIMAT000752      .....CUGGCCUUCUGCCUUCGG..... 1995
NGS-Mature           .....CUGGCCUUCUGCCUUCCG..... 165
NGS-Mature           .....UGGCCUUCUGCCUUCGG..... 63
NGS-Mature           .....CUGGCCUUCUGCCUUC..... 52
NGS-Mature           .....CUGGCCUUCUGCCUUC..... 41
NGS-Mature           .....CUGGCCUUCUGCCUUC..... 21
NGS-Star             .....GGGGGCGAGGGGCGACAGG..... 9
NGS-Mature           .....CUGGCCUUCUGCCUUCCGC..... 7
NGS-Mature           .....AGAAAGUGCAUACAGCCC..... 4
NGS-Star             .....GGGGGCGAGGGGCGACAGG..... 4
NGS-Mature           .....UGGCCUUCUGCCUUC..... 3
NGS-Mature           .....CCUGGCCUUCUGCCUUCGG..... 3
NGS-Mature           .....CCUGGCCUUCUGCCUUC..... 2
NGS-Star             .....GGGGGCGAGGGGCGUCA..... 1
NGS-Star             .....GGGGGCGAGGGGCGUCAG..... 1
NGS-Star             .....GGGGGCGAGGGGCGUCAGG..... 1
NGS-Star             .....GGGGGCGAGGGGCGUCAGG..... 1
NGS-Star             .....GGGGGCGAGGGGCGUCAGG..... 1

hsa-mir-137 MI000454      GGUCUUCUGACUCUCUUCGGUGAGGGGAUUAUUGGGGGAUAUAUCGGAUAUACGUUGUUAUUGCUUAAGAUAUCGCGUAGUCGAGGAGUACCAGCGGA
((.....(((.....((.....))).....)).....)).....)).....)).....)).....)).....)).....)).....)).....

hsa-miR-137 MIMAT000429      .....UUAUUGCUUAAGAAUACGCGUAG.....
NGS-Mature           .....UUAUUGCUUAAGAAUACGCGUAG..... 16267

```



|                           |                                                                                   |      |
|---------------------------|-----------------------------------------------------------------------------------|------|
| NGS-Mature                | .....UUAUUGC...AAGAAUACGCGUA.....                                                 | 9974 |
| NGS-Mature                | .....UUAUUGC...AAGAAUACGCGU.....                                                  | 4607 |
| NGS-Mature                | .....UUAUUGC...AAGAAUACGCGUAG.....                                                | 1182 |
| NGS-Mature                | .....AUUGC...AAGAAUACGCGUAGU.....                                                 | 1138 |
| NGS-Mature                | .....UUAUUGC...AAGAAUACGCGUAGU.....                                               | 736  |
| NGS-Mature                | .....UUAUUGC...AAGAAUACGCGUAGU.....                                               | 648  |
| NGS-Mature                | .....UUAUUGC...AAGAAUACGCGUA.....                                                 | 444  |
| NGS-Mature                | .....AUUGC...AAGAAUACGCGUAG.....                                                  | 357  |
| NGS-Mature                | .....UUAUUGC...AAGAAUACGCGU.....                                                  | 272  |
| NGS-Star                  | .....ACGGGUAUUCUUGGGUGGAUAAU.....                                                 | 146  |
| NGS-Star                  | .....ACGGGUAUUCUUGGGUGGAU.....                                                    | 80   |
| NGS-Star                  | .....ACGGGUAUUCUUGGGUGGAUAA.....                                                  | 78   |
| NGS-Star                  | .....ACGGGUAUUCUUGGGUGGAUAAU.....                                                 | 40   |
| NGS-Star                  | .....ACGGGUAUUCUUGGGUGGAUA.....                                                   | 18   |
| NGS-Star                  | .....UCCUCUGACUCUCUUCGGUG.....                                                    | 6    |
| NGS-Star                  | .....CCUCUGACUCUCUUCGGUG.....                                                     | 3    |
| NGS-Star                  | .....GUCUCUGACUCUCUUCGGUG.....                                                    | 2    |
| NGS-Star                  | .....GACGGGUAUUCUUGGGUGGAU.....                                                   | 2    |
| NGS-Star                  | .....CGGGUAUUCUUGGGUGGAUAAU.....                                                  | 2    |
| hsa-mir-3158-1 MI0014186  | AUUCAGGCCGGUCCUGCAGAGAGGAAGCCUUCUGCUUACAGGUUUGGAGGGCUUCCUCUCUGCAGGACCGCCUGAAU     |      |
|                           | (((((.....))))))                                                                  |      |
| hsa-miR-3158 MIMAT0015032 | .....AAGGGCUUCCUCUCUGCAGGAC.....                                                  |      |
| NGS-Mature                | .....AAGGGCUUCCUCUCUGCAGGAC.....                                                  | 372  |
| NGS-Mature                | .....AAGGGCUUCCUCUCUGCAGGA.....                                                   | 200  |
| NGS-Mature                | .....AAGGGCUUCCUCUCUGCAGG.....                                                    | 30   |
| NGS-Mature                | .....AGGGCUUCCUCUCUGCAGGAC.....                                                   | 26   |
| NGS-Star                  | .....CCUGCAGAGAGGAAGCCUUCU.....                                                   | 25   |
| NGS-Star                  | .....CCUGCAGAGAGGAAGCCUUC.....                                                    | 13   |
| NGS-Star                  | .....GUCCUGCAGAGAGGAAGCCUUC.....                                                  | 8    |
| NGS-Mature                | .....AAGGGCUUCCUCUCUGCAGGAC.....                                                  | 7    |
| NGS-Mature                | .....AGGGCUUCCUCUCUGCAGGACG.....                                                  | 7    |
| NGS-Star                  | .....UCCUGCAGAGAGGAAGCCUUC.....                                                   | 7    |
| NGS-Mature                | .....AGGGCUUCCUCUCUGCAGGA.....                                                    | 6    |
| NGS-Mature                | .....AGGGCUUCCUCUCUGCAGGAC.....                                                   | 6    |
| NGS-Star                  | .....UCCUGCAGAGAGGAAGCCUUC.....                                                   | 5    |
| NGS-Mature                | .....AAGGGCUUCCUCUCUGCA.....                                                      | 4    |
| NGS-Mature                | .....AAGGGCUUCCUCUCUGCAG.....                                                     | 3    |
| NGS-Star                  | .....UCCUGCAGAGAGGAAGCCUUC.....                                                   | 2    |
| NGS-Star                  | .....GGUCCUGCAGAGAGGAAGCCUUC.....                                                 | 1    |
| NGS-Star                  | .....GUCCUGCAGAGAGGAAGCCUUC.....                                                  | 1    |
| NGS-Star                  | .....CGGUCCUGCAGAGAGGAAGCC.....                                                   | 1    |
| NGS-Star                  | .....CCUGCAGAGAGGAAGCCUUC.....                                                    | 1    |
| hsa-mir-3158-2 MI0014187  | AUUCAGGCCGGUCCUGCAGAGAGGAAGCCUUCUCCAAUACCUGUAAGCAGAAGGGCUUCCUCUCUGCAGGACCGCCUGAAU |      |
|                           | (((((.....))))))                                                                  |      |
| hsa-miR-3158 MIMAT0015032 | .....AAGGGCUUCCUCUCUGCAGGAC.....                                                  |      |
| NGS-Mature                | .....AAGGGCUUCCUCUCUGCAGGAC.....                                                  | 372  |
| NGS-Mature                | .....AAGGGCUUCCUCUCUGCAGGA.....                                                   | 200  |
| NGS-Mature                | .....AAGGGCUUCCUCUCUGCAGG.....                                                    | 30   |
| NGS-Mature                | .....AGGGCUUCCUCUCUGCAGGAC.....                                                   | 26   |
| NGS-Star                  | .....CCUGCAGAGAGGAAGCCUUC.....                                                    | 13   |
| NGS-Star                  | .....GUCCUGCAGAGAGGAAGCCUUC.....                                                  | 8    |
| NGS-Mature                | .....AAGGGCUUCCUCUCUGCAGGAC.....                                                  | 7    |
| NGS-Star                  | .....UCCUGCAGAGAGGAAGCCUUC.....                                                   | 7    |
| NGS-Mature                | .....AGGGCUUCCUCUCUGCAGGACG.....                                                  | 7    |
| NGS-Mature                | .....AGGGCUUCCUCUCUGCAGGAC.....                                                   | 6    |
| NGS-Mature                | .....AGGGCUUCCUCUCUGCAGGA.....                                                    | 6    |
| NGS-Star                  | .....UCCUGCAGAGAGGAAGCCUUC.....                                                   | 5    |
| NGS-Mature                | .....AAGGGCUUCCUCUCUGCA.....                                                      | 4    |
| NGS-Mature                | .....AAGGGCUUCCUCUCUGCAG.....                                                     | 3    |
| NGS-Star                  | .....UCCUGCAGAGAGGAAGCCUUC.....                                                   | 2    |
| NGS-Star                  | .....GGUCCUGCAGAGAGGAAGCCUUC.....                                                 | 1    |
| NGS-Star                  | .....GUCCUGCAGAGAGGAAGCCUUC.....                                                  | 1    |
| NGS-Star                  | .....CGGUCCUGCAGAGAGGAAGCC.....                                                   | 1    |
| NGS-Star                  | .....CCUGCAGAGAGGAAGCCUUC.....                                                    | 1    |
| hsa-mir-3187 MI0014231    | GCUGGCCUGGGCAGCGUGUGGCUAAGGUCACCAUGUUCUCCUUGGCCAUGGGGCUGCGCGGGCCAGC               |      |
|                           | (((((.....))))))                                                                  |      |
| hsa-miR-3187 MIMAT0015069 | .....UUGGCCAUGGGGCUGCGCGG.....                                                    |      |
| NGS-Mature                | .....UUGGCCAUGGGGCUGCGCGG.....                                                    | 124  |
| NGS-Mature                | .....UUGGCCAUGGGGCUGCGCGGGC.....                                                  | 46   |
| NGS-Mature                | .....UUGGCCAUGGGGCUGCGCGGG.....                                                   | 36   |
| NGS-Mature                | .....UUGGCCAUGGGGCUGCGCGGG.....                                                   | 34   |
| NGS-Star                  | .....CCUGGGCAGCGUGUGGCUAAGG.....                                                  | 19   |
| NGS-Mature                | .....UUGGCCAUGGGGCUGCGCG.....                                                     | 9    |
| NGS-Star                  | .....CCUGGGCAGCGUGUGGCUAAG.....                                                   | 7    |
| NGS-Mature                | .....UUGGCCAUGGGGCUGCGC.....                                                      | 4    |
| NGS-Star                  | .....CCUGGGCAGCGUGUGGCUAAGU.....                                                  | 3    |



|                           |                                                                                                            |      |
|---------------------------|------------------------------------------------------------------------------------------------------------|------|
| NGS-Star                  | . . . . . UACUCUGGAGAGUGACAAUCA . . . . .                                                                  | 736  |
| NGS-Star                  | . . . . . UACUCUGGAGAGUGACAAUCAUG . . . . .                                                                | 538  |
| NGS-Star                  | . . . . . UACUCUGGAGAGUGACAAUCAU . . . . .                                                                 | 283  |
| NGS-Mature                | . . . . . AUUGACACUUCUGUGAGUAG . . . . .                                                                   | 227  |
| NGS-Star                  | . . . . . UACUCUGGAGAGUGACAAUC . . . . .                                                                   | 163  |
| NGS-Mature                | . . . . . UUGACACUUCUGUGAGUAGA . . . . .                                                                   | 159  |
| NGS-Mature                | . . . . . UGAUUGACACUUCUGUGAGUAG . . . . .                                                                 | 121  |
| NGS-Star                  | . . . . . UACUCUGGAGAGUGACAAU . . . . .                                                                    | 101  |
| NGS-Mature                | . . . . . UUGAUUGACACUUCUGUGAGUAGA . . . . .                                                               | 95   |
| NGS-Mature                | . . . . . AUUGACACUUCUGUGAGUA . . . . .                                                                    | 47   |
| NGS-Mature                | . . . . . UUGAUUGACACUUCUGUGAGUAG . . . . .                                                                | 37   |
| NGS-Mature                | . . . . . UGAUUGACACUUCUGUGAGUA . . . . .                                                                  | 18   |
| NGS-Mature                | . . . . . AUUGACACUUCUGUGAGU . . . . .                                                                     | 13   |
| NGS-Star                  | . . . . . UACUCUGGAGAGUGACAA . . . . .                                                                     | 13   |
| NGS-Star                  | . . . . . UACUCUGGAGAGUGACAAUCAUGU . . . . .                                                               | 10   |
| NGS-Star                  | . . . . . UACUCUGGAGAGUGACAAUCAUGUAU . . . . .                                                             | 7    |
| NGS-Star                  | . . . . . ACUCUGGAGAGUGACAAUCA . . . . .                                                                   | 6    |
| NGS-Star                  | . . . . . ACUCUGGAGAGUGACAAUC . . . . .                                                                    | 3    |
| hsa-mir-514-3 MI0003200   | GUUGUCUGUGUACCCUACUCUGGAGAGUGACAAUCAUGUAUAACUAAAUUUGAUUGACACUUCUGUGAGUAGUAACGCAUGACAC                      |      |
| hsa-miR-514 MIMAT002883   | .. (((((((((( (((((((((((((( (((((((((((((( (((((((((((((( (((((((((((((( (((((((((((((( ((((((((((((((    |      |
| NGS-Mature                | . . . . . AUUGACACUUCUGUGAGUAGA . . . . .                                                                  | 4401 |
| NGS-Mature                | . . . . . AUUGACACUUCUGUGAGUAGA . . . . .                                                                  | 1065 |
| NGS-Star                  | . . . . . UACUCUGGAGAGUGACAAUCA . . . . .                                                                  | 736  |
| NGS-Star                  | . . . . . UACUCUGGAGAGUGACAAUCAUG . . . . .                                                                | 538  |
| NGS-Star                  | . . . . . UACUCUGGAGAGUGACAAUCAU . . . . .                                                                 | 283  |
| NGS-Mature                | . . . . . AUUGACACUUCUGUGAGUAG . . . . .                                                                   | 227  |
| NGS-Star                  | . . . . . UACUCUGGAGAGUGACAAUC . . . . .                                                                   | 163  |
| NGS-Mature                | . . . . . UUGACACUUCUGUGAGUAGA . . . . .                                                                   | 159  |
| NGS-Mature                | . . . . . UGAUUGACACUUCUGUGAGUAG . . . . .                                                                 | 121  |
| NGS-Star                  | . . . . . UACUCUGGAGAGUGACAAU . . . . .                                                                    | 101  |
| NGS-Mature                | . . . . . UUGAUUGACACUUCUGUGAGUAGA . . . . .                                                               | 95   |
| NGS-Mature                | . . . . . AUUGACACUUCUGUGAGUA . . . . .                                                                    | 47   |
| NGS-Mature                | . . . . . UUGAUUGACACUUCUGUGAGUAG . . . . .                                                                | 37   |
| NGS-Mature                | . . . . . UGAUUGACACUUCUGUGAGUA . . . . .                                                                  | 18   |
| NGS-Mature                | . . . . . AUUGACACUUCUGUGAGU . . . . .                                                                     | 13   |
| NGS-Star                  | . . . . . UACUCUGGAGAGUGACAA . . . . .                                                                     | 13   |
| NGS-Star                  | . . . . . UACUCUGGAGAGUGACAAUCAUGU . . . . .                                                               | 10   |
| NGS-Star                  | . . . . . UACUCUGGAGAGUGACAAUCAUGUAU . . . . .                                                             | 7    |
| NGS-Star                  | . . . . . ACUCUGGAGAGUGACAAUCA . . . . .                                                                   | 6    |
| NGS-Star                  | . . . . . ACUCUGGAGAGUGACAAUC . . . . .                                                                    | 3    |
| hsa-mir-548v MI014174     | AAUACUAGGUUUGAGCAAAGUAAUUGCGGUUUUGCCAUCAUGCCAAAAGCUACAGUUACUUUUGCACCAGCCUAAUUAU                            |      |
| hsa-miR-548v MIMAT0015020 | ((((( (((((((((( (((((((((((((( (((((((((((((( (((((((((((((( (((((((((((((( (((((((((((((( (((((((((((((( |      |
| NGS-Mature                | . . . . . AGCUACAGUUACUUUUGCACCA . . . . .                                                                 | 147  |
| NGS-Mature                | . . . . . AGCUACAGUUACUUUUGCAC . . . . .                                                                   | 48   |
| NGS-Star                  | . . . . . GAGCAAAGUAAUUGCGGUUUU . . . . .                                                                  | 47   |
| NGS-Star                  | . . . . . AAAAGUAAUUGCGGUUUU . . . . .                                                                     | 43   |
| NGS-Star                  | . . . . . GAGCAAAGUAAUUGCGGUUUU . . . . .                                                                  | 38   |
| NGS-Mature                | . . . . . AGCUACAGUUACUUUUGCA . . . . .                                                                    | 18   |
| NGS-Mature                | . . . . . AGCUACAGUUACUUUUGCAC . . . . .                                                                   | 17   |
| NGS-Star                  | . . . . . GAGCAAAGUAAUUGCGGUU . . . . .                                                                    | 12   |
| NGS-Mature                | . . . . . AAAGCUACAGUUACUUUUGCAC . . . . .                                                                 | 11   |
| NGS-Mature                | . . . . . AAGCUACAGUUACUUUUGCACCA . . . . .                                                                | 11   |
| NGS-Mature                | . . . . . AAGCUACAGUUACUUUUGCAC . . . . .                                                                  | 10   |
| NGS-Mature                | . . . . . AAAGCUACAGUUACUUUUGCA . . . . .                                                                  | 8    |
| NGS-Mature                | . . . . . AAAGCUACAGUUACUUUUGCAC . . . . .                                                                 | 6    |
| NGS-Mature                | . . . . . AAGCUACAGUUACUUUUGCA . . . . .                                                                   | 5    |
| NGS-Star                  | . . . . . AAAGUAAUUGCGGUUUUGCCA . . . . .                                                                  | 3    |
| NGS-Star                  | . . . . . AAAAGUAAUUGCGGUUUUGCC . . . . .                                                                  | 3    |
| NGS-Star                  | . . . . . AAAAGUAAUUGCGGUUUUGCCA . . . . .                                                                 | 3    |
| NGS-Star                  | . . . . . UGAGCAAAGUAAUUGCGGUU . . . . .                                                                   | 3    |
| NGS-Star                  | . . . . . GAGCAAAGUAAUUGCGGU . . . . .                                                                     | 3    |
| NGS-Star                  | . . . . . UGAGCAAAGUAAUUGCGGU . . . . .                                                                    | 2    |
| hsa-mir-551a MI0003556    | GGGGACUGCCGGGUGACCCUGGAAUUCAGAGUGGGUGGGGCCAGUCUGACCGUUUCUAGGCGACCCACUCUUGGUUCCAGGGGUUCCCGGAAA              |      |
| hsa-miR-551a MIMAT0003214 | ((((( (((((((((( (((((((((((((( (((((((((((((( (((((((((((((( (((((((((((((( (((((((((((((( (((((((((((((( |      |
| NGS-Mature                | . . . . . GCGACCCACUCUUGGUUCCA . . . . .                                                                   | 145  |
| NGS-Mature                | . . . . . GCGACCCACUCUUGGUUCC . . . . .                                                                    | 117  |
| NGS-Mature                | . . . . . GCGACCCACUCUUGGUUCC . . . . .                                                                    | 31   |
| NGS-Mature                | . . . . . GCGACCCACUCUUGGUUCCA . . . . .                                                                   | 11   |
| NGS-Mature                | . . . . . GCGACCCACUCUUGGUUU . . . . .                                                                     | 6    |
| NGS-Mature                | . . . . . CGACCCACUCUUGGUUCC . . . . .                                                                     | 5    |
| NGS-Mature                | . . . . . GACCCACUCUUGGUUCCA . . . . .                                                                     | 4    |
| NGS-Star                  | . . . . . GAAAUCCAGAGUGGGUGGGGC . . . . .                                                                  | 2    |
| NGS-Mature                | . . . . . GCGACCCACUCUUGGUUU . . . . .                                                                     | 2    |

```

NGS-Star .....GAAUCCAGAGUGGGGGGCCA..... 1
NGS-Star .GGGACUGCCGGGUGACCCU..... 1
NGS-Star .GGGACUGCCGGGUGACCCUG..... 1
NGS-Mature .....GACCCACUCUUGGUUCC..... 1

hsa-mir-643 MI0003658 ACCAAGUGAUUAUCAUUGUCUACCUGAGCUAGAAUACAAGUAGUUGGGCCUUCAGAGACACUUGUAGUCUAGCUCAGGUAUAUUGAAUGAAAA
.....((((((((((((((((((((((((((((((((((((((((((((((((((((((((((((((((((((((((((((((((((((((((((((((((
hsa-miR-643 MIMAT0003313 .....ACUUGUAUGCUAGCUCAGGUAG.....
NGS-Mature .....ACACUUGUAUGCUAGCUCAGGU..... 205
NGS-Mature .....ACACUUGUAUGCUAGCUCAGGUA..... 53
NGS-Mature .....ACACUUGUAUGCUAGCUCAGG..... 32
NGS-Mature .....ACACUUGUAUGCUAGCUCAG..... 32
NGS-Star .....ACCUGAGCUAGAAUACAAGUAGU..... 30
NGS-Mature .....ACUUGUAUGCUAGCUCAGGUAG..... 28
NGS-Mature .....CACUUGUAUGCUAGCUCAGGUA..... 18
NGS-Mature .....CACUUGUAUGCUAGCUCAGGU..... 12
NGS-Star .....UACCUGAGCUAGAAUACAAGUA..... 8
NGS-Mature .....ACACUUGUAUGCUAGCUC..... 5
NGS-Star .....CCUGAGCUAGAAUACAAGUAGU..... 5
NGS-Mature .....ACUUGUAUGCUAGCUCAGGUA..... 4
NGS-Star .....ACCUGAGCUAGAAUACAAGUA..... 4
NGS-Mature .....ACACUUGUAUGCUAGCUCA..... 4
NGS-Star .....ACCUGAGCUAGAAUACAAGUAG..... 4
NGS-Star .....ACCUGAGCUAGAAUACAAGU..... 2
NGS-Star .....CCUGAGCUAGAAUACAAGUAG..... 2
NGS-Star .....CUGAGCUAGAAUACAAGUAG..... 2
NGS-Star .....CUGAGCUAGAAUACAAGUAGU..... 1
NGS-Star .....CUGAGCUAGAAUACAAGUAGUU..... 1

hsa-mir-760 MI0005567 GGGCGGUCGCCCCUUCAGUCCACAGCCGCGGUAUCCUAGAAUUCGGGUCUGGGUCUGGGGAGCGAAUUGCAAC
.....((((((((((((((((((((((((((((((((((((((((((((((((((((((((((((((((((((((((((((((((((((((((((((((((
hsa-miR-760 MIMAT0004957 .....CGGCUCUGGGUCUGGGGGA.....
NGS-Mature .....CGGCUCUGGGUCUGGGGAG..... 1052
NGS-Mature .....CGGCUCUGGGUCUGGGGGA..... 532
NGS-Mature .....CGGCUCUGGGUCUGGGG..... 172
NGS-Mature .....CGGCUCUGGGUCUGGG..... 69
NGS-Mature .....UCGGCUCUGGGUCUGGGGAG..... 62
NGS-Mature .....UCGGCUCUGGGUCUGGGGA..... 25
NGS-Mature .....CGGCUCUGGGUCUGGGGAGC..... 24
NGS-Mature .....UCGGCUCUGGGUCUGGG..... 9
NGS-Mature .....UCGGCUCUGGGUCUGGGG..... 7
NGS-Mature .....GGCUCUGGGUCUGGGGAG..... 6
NGS-Star .....CCCCUCAGUCCACAGGCCCGGA..... 4
NGS-Star .....CCCCUCAGUCCACAGGCCCGGAU..... 3
NGS-Star .....CCCCUCAGUCCACAGGCCCGG..... 2
NGS-Star .....CCCCUCAGUCCACAGGCCCGGAU..... 1
NGS-Star .....CCCCUCAGUCCACAGGCCCG..... 1
NGS-Star .....CCCCUCAGUCCACAGG..... 1

hsa-mir-1269 MI0006406 UGGAUUGCCUAGACCAGGGAAGCCAGUUGGCAUGGCCUAGUCCAAGUCUGACCACCUAGAGAAUGCCUGGACUGAGCCGUGCUACUGGCUUCCUGGUCUCCAGC
.....((((((((((((((((((((((((((((((((((((((((((((((((((((((((((((((((((((((((((((((((((((((((((((((((
hsa-miR-1269 MIMAT0005923 .....CUGGACUGAGCCGUGCUACUGG.....
NGS-Mature .....CUGGACUGAGCCGUGCUACU..... 6599
NGS-Mature .....CUGGACUGAGCCGUGCUACUGG..... 4606
NGS-Mature .....CUGGACUGAGCCGUGCUAC..... 1239
NGS-Mature .....CUGGACUGAGCCGUGCUACUG..... 1032
NGS-Mature .....CUGGACUGAGCCGUGCUA..... 305
NGS-Star .....AGUUGGCAUGGCUAGUCCAAGU..... 147
NGS-Mature .....CCUGGACUGAGCCGUGCUACU..... 120
NGS-Mature .....CCUGGACUGAGCCGUGCUACUGG..... 98
NGS-Mature .....CCUGGACUGAGCCGUGCUAC..... 27
NGS-Mature .....UGGACUGAGCCGUGCUACUGG..... 27
NGS-Mature .....CCUGGACUGAGCCGUGCUACUG..... 25
NGS-Star .....AGUUGGCAUGGCUAGUCCAAGUC..... 15
NGS-Star .....AGUUGGCAUGGCUAGUCCAAG..... 14
NGS-Star .....UUGCCUAGACCAGGGAAGCC..... 11
NGS-Star .....UGGCAUGGCUAGUCCAAGU..... 6
NGS-Star .....AGUUGGCAUGGCUAGUCCA..... 6
NGS-Star .....UGGCAUGGCUAGUCCAAG..... 2
NGS-Star .....CAUGGCUAGUCCAAGUC..... 2
NGS-Star .....AGUUGGCAUGGCUAGUCCA..... 1

NGS-Star .....UGCCUAGACCAGGGAAGCC..... 1

hsa-mir-376c MI0000776 AAAAGGUGGAUAUUCUUCUAUGUUUAUGUUUAUUGUUAAACAUAAGAGGAAAUUCCACGUUUU
.....((((((((((((((((((((((((((((((((((((((((((((((((((((((((((((((((((((((((((((((((((((((((((((((((
hsa-miR-376c MIMAT0000720 .....AACAUAGAGGAAAUUCCACGU.....
NGS-Mature .....AACAUAGAGGAAAUUCCACGU..... 11771
NGS-Mature .....AACAUAGAGGAAAUUCCACG..... 1158
NGS-Mature .....AACAUAGAGGAAAUUCCACGU..... 788

```

```

NGS-Mature ..... ACAUAGAGGAAAUUCCAC..... 654
NGS-Mature ..... AACAUAGAGGAAAUUCCA..... 126
NGS-Mature ..... AACAUAGAGGAAAUUCCACGUUU. 77
NGS-Mature ..... ACAUAGAGGAAAUUCCACGU... 65
NGS-Star ..... GUGGAUUAUCCUUCUAUGUUU..... 45
NGS-Star ..... GUGGAUUAUCCUUCUAUGUUUA..... 41
NGS-Mature ..... AACAUAGAGGAAAUUCCACG... 38
NGS-Mature ..... ACAUAGAGGAAAUUCCACGUUU. 35
NGS-Mature ..... ACAUAGAGGAAAUUCCACGUU.. 32
NGS-Star ..... UGGAUUAUCCUUCUAUGUUUA..... 21
NGS-Star ..... UGGAUUAUCCUUCUAUGUUU..... 10
NGS-Star ..... GUGGAUUAUCCUUCUAUG..... 10
NGS-Star ..... GUGGAUUAUCCUUCUAUGUUU..... 9
NGS-Star ..... UGGAUUAUCCUUCUAUGUUUA..... 8
NGS-Star ..... UGGAUUAUCCUUCUAUGUU..... 7
NGS-Star ..... GUGGAUUAUCCUUCUAUGU..... 5
NGS-Star ..... GUGGAUUAUCCUUCUAUGUU..... 3

```

```

hsa-mir-381 MI0000789 UACUUA...AGCGAGGU...GCCCCUUUGUAUAUUCGGUUUAUUGACAUGGAAUUAACAAGGGCAAGCUCUCUGAGUA
(((((((.....))))))))).....
hsa-miR-381 MIMAT0000736 ..... UAUACAAGGGCAAGCUCUCUGU.....
NGS-Mature ..... UAUACAAGGGCAAGCUCUCUGU..... 2576
NGS-Mature ..... UAUACAAGGGCAAGCUCUCU..... 250
NGS-Star ..... AGCGAGGU...GCCCCUUUGUAU..... 189
NGS-Star ..... AGCGAGGU...GCCCCUUUGUAUUAU..... 158
NGS-Mature ..... ACAAGGGCAAGCUCUCUGU..... 128
NGS-Mature ..... AUACAAGGGCAAGCUCUCUGU..... 107
NGS-Mature ..... AUUAACAAGGGCAAGCUCUCU..... 103
NGS-Mature ..... UAUACAAGGGCAAGCUCUCUG..... 99
NGS-Mature ..... CAAGGGCAAGCUCUCUGU..... 71
NGS-Mature ..... UAUACAAGGGCAAGCUCUC..... 70
NGS-Mature ..... AUUAACAAGGGCAAGCUCUCUGU..... 68
NGS-Star ..... AGCGAGGU...GCCCCUUUGUAUUAU..... 61
NGS-Mature ..... AUACAAGGGCAAGCUCUCU..... 60
NGS-Star ..... AGCGAGGU...GCCCCUUUGUAUA..... 27
NGS-Star ..... AGCGAGGU...GCCCCUUUGUA..... 24
NGS-Star ..... AGCGAGGU...GCCCCUUUGU..... 9
NGS-Star ..... GGUUGCCCCUUUGUAUUAU..... 8
NGS-Star ..... AGGUUGCCCCUUUGUAUAUC..... 5
NGS-Star ..... AGCGAGGU...GCCCCUUUGUAUUAUC..... 2
NGS-Star ..... AGGUUGCCCCUUUGUAUUAU..... 2

```

```

hsa-mir-889 MI0005540 GUGCUU...AAGAAUGGCUGCCGUAGUUGGUUCUUAUAUUUAUGAUGAUUAUAUCGGACAACCAUUGUUUUAGUAUCC
(((((((.....))))))))).....
hsa-miR-889 MIMAT0004921 ..... UUAUAUCGGACAACCAUUGU.....
NGS-Mature ..... UUAUAUCGGACAACCAUUGU..... 25416
NGS-Mature ..... UUAUAUCGGACAACCAUUG..... 1408
NGS-Mature ..... UUAUAUCGGACAACCAUUGUU..... 1080
NGS-Mature ..... UUAUAUCGGACAACCAUU..... 723
NGS-Mature ..... UUAUAUCGGACAACCAU..... 197
NGS-Mature ..... UUAUAUCGGACAACCAUUGUU..... 172
NGS-Mature ..... UUAUAUCGGACAACCAUUGU..... 148
NGS-Mature ..... AAUAUCGGACAACCAUUGU..... 132
NGS-Mature ..... AUUAUAUCGGACAACCAUUGU..... 57
NGS-Star ..... AAUGGCUGUCCGUAGUAUGGU..... 24
NGS-Mature ..... UUAUAUCGGACAACCAUUGUU..... 18
NGS-Star ..... AAUGGCUGUCCGUAGUAUGGU..... 9
NGS-Star ..... AAUGGCUGUCCGUAGUAUGG..... 9
NGS-Star ..... AAUGGCUGUCCGUAGUAUG..... 4
NGS-Star ..... AAUGGCUGUCCGUAGUAU..... 4
NGS-Star ..... AAUGGCUGUCCGUAGUAUGGC..... 3
NGS-Star ..... GAAUGGCUGUCCGUAGUAUGGU..... 2
NGS-Star ..... GAAUGGCUGUCCGUAGUA..... 1

```

```

hsa-mir-3173 MI0014204 UCCCUGCCCUGCCU...UUUUUUUUGAUUUUAUGAGAACAAGGAGGAAA...UAGGCAGGCCAGGGA
(((((((.....))))))))).....
hsa-miR-3173 MIMAT0015048 ..... AAAGGAGGAAA...UAGGCAGGCCA.....
NGS-Star ..... UGCCUGCCUGUUUUUCCUUU..... 36
NGS-Mature ..... AAAGGAGGAAA...UAGGCAGGCCA..... 33
NGS-Mature ..... AAGGAGGAAA...UAGGCAGGCCA..... 25
NGS-Mature ..... AAGGAGGAAA...UAGGCAGGCCAG... 14
NGS-Mature ..... AAAGGAGGAAA...UAGGCAGGCC..... 13
NGS-Mature ..... AGGAGGAAA...UAGGCAGGCCAGG... 9
NGS-Star ..... CCCUGCCUGUUUUUCCUUUGU..... 9
NGS-Mature ..... AAAGGAGGAAA...UAGGCAGGCCAG... 8
NGS-Mature ..... AAGGAGGAAA...UAGGCAGGCC..... 6
NGS-Mature ..... AAGGAGGAAA...UAGGCAGGCCAGG... 6
NGS-Star ..... CCCUGCCUGUUUUUCCUUUG..... 5
NGS-Mature ..... AAGGAGGAAA...UAGGCAGGCCAG... 4
NGS-Star ..... UGCCUGCCUGUUUUUCCUUU..... 4

```

|                           |                                                                                                |     |
|---------------------------|------------------------------------------------------------------------------------------------|-----|
| NGS-Star                  | .....GCCCGCCGUUUUUCUCCUUU.....                                                                 | 4   |
| NGS-Mature                | .....AGGAGGAAAAGGAGGCCA.....                                                                   | 4   |
| NGS-Star                  | .....CCUGCCGUUUUUCUCCUU.....                                                                   | 3   |
| NGS-Star                  | .....CCUGCCGUUUUUCUCCUUUG.....                                                                 | 3   |
| NGS-Star                  | .....UGCCCGCCGUUUUUCUCCUU.....                                                                 | 3   |
| NGS-Star                  | .....UGCCCGCCGUUUUUCUCCU.....                                                                  | 3   |
| NGS-Star                  | .....GCCUGCCGUUUUUCUCCUU.....                                                                  | 2   |
| hsa-mir-3190 MI0014235    | CUGGGGUCACCGUCUGGCCAGCUACGUCGCCACGGCCUUUGCAGUGGAAAGGUAGAGCGCCAGAGAGGUGACCCCGG                  |     |
|                           | ((((((((.....)))))))))                                                                         |     |
| hsa-miR-3190 MIMAT0015073 | .....UGUGGAAGGUAGACGGCCAGAGA.....                                                              |     |
| NGS-Mature                | .....UGGAAGGUAGACGGCCAGAGAG.....                                                               | 122 |
| NGS-Mature                | .....GUGGAAGGUAGACGGCCAGAGA.....                                                               | 99  |
| NGS-Mature                | .....UGGAAGGUAGACGGCCAGAGA.....                                                                | 98  |
| NGS-Mature                | .....UGGAAGGUAGACGGCCAGAGAG.....                                                               | 35  |
| NGS-Mature                | .....GUGGAAGGUAGACGGCCAGAG.....                                                                | 29  |
| NGS-Mature                | .....UGGAAGGUAGACGGCCAGAG.....                                                                 | 27  |
| NGS-Mature                | .....UGUGGAAGGUAGACGGCCAGAGA.....                                                              | 21  |
| NGS-Mature                | .....AAGGUAGACGGCCAGAGAGGUGA.....                                                              | 7   |
| NGS-Mature                | .....GUGGAAGGUAGACGGCCAGA.....                                                                 | 7   |
| NGS-Mature                | .....AAGGUAGACGGCCAGAGAGGUG.....                                                               | 6   |
| NGS-Star                  | .....UGUCUGGCCAGCUACGUCCCA.....                                                                | 2   |
| NGS-Star                  | .....GGGUCACCUUGUCUGGC.....                                                                    | 1   |
| NGS-Star                  | CUGGGGUCACCUUGUCUGGC.....                                                                      | 1   |
| hsa-mir-548s MI0014141    | UUGCUGCAAAAAUAAUUGCAGUUUUUUGCCAAUUUUUUUUUAAUAAUAAUAAUAAUGGCCAAAAACUGCAGUUUUUUUGCACCAA          |     |
|                           | (((((.....))))))                                                                               |     |
| hsa-miR-548s MIMAT0014987 | .....AUGGCCAAAACUGCAGUUUUUU.....                                                               |     |
| NGS-Mature                | .....AUGGCCAAAACUGCAGUUUUUU.....                                                               | 122 |
| NGS-Mature                | .....UAAUGGCCAAAACUGCAGUUUU.....                                                               | 116 |
| NGS-Mature                | .....AUGGCCAAAACUGCAGUUUU.....                                                                 | 34  |
| NGS-Mature                | .....AUGGCCAAAACUGCAGUU.....                                                                   | 24  |
| NGS-Mature                | .....AUGGCCAAAACUGCAGUUUU.....                                                                 | 19  |
| NGS-Star                  | .....AUAUUUGCAGUUUUUGCCAU.....                                                                 | 16  |
| NGS-Star                  | .....AUAUUUGCAGUUUUUGCCAUUA.....                                                               | 16  |
| NGS-Mature                | .....UAAUGGCCAAAACUGCAGUUUA.....                                                               | 15  |
| NGS-Mature                | .....UAAUGGCCAAAACUGCAGUUUU.....                                                               | 14  |
| NGS-Mature                | .....AAUGGCCAAAACUGCAGUUUUUU.....                                                              | 9   |
| NGS-Mature                | .....AUGGCCAAAACUGCAGUUUU.....                                                                 | 9   |
| NGS-Mature                | .....UGGCCAAAACUGCAGUUUUUU.....                                                                | 8   |
| NGS-Star                  | .....AUAUUUGCAGUUUUUGCCAU.....                                                                 | 7   |
| NGS-Star                  | .....AUAUUUGCAGUUUUUGCCAU.....                                                                 | 1   |
| NGS-Star                  | .....AAUUGCAGUUUUUGCCAUUA.....                                                                 | 1   |
| hsa-mir-548u MI0014168    | AUUAGGAUGGUGCAAAAGUAAUGUGGUUUUUUUCUUUUUUUUAAUGGCCAAAAGACUGCAUUUUCUUUUGGCCAACCUAAU              |     |
|                           | (((((.....))))))                                                                               |     |
| hsa-miR-548u MIMAT0015013 | .....CAAAGACUGCAAUUUCUUUUGCG.....                                                              |     |
| NGS-Mature                | .....CAAAGACUGCAAUUUCUUUUGCG.....                                                              | 238 |
| NGS-Mature                | .....CAAAGACUGCAAUUUCUUUUG.....                                                                | 151 |
| NGS-Mature                | .....CAAAGACUGCAAUUUCUUUUGC.....                                                               | 80  |
| NGS-Mature                | .....CAAAGACUGCAAUUUCUUUU.....                                                                 | 52  |
| NGS-Mature                | .....AAAGACUGCAAUUUCUUUUGCG.....                                                               | 30  |
| NGS-Mature                | .....AAAGACUGCAAUUUCUUUU.....                                                                  | 23  |
| NGS-Mature                | .....AAAGACUGCAAUUUCUUUUG.....                                                                 | 21  |
| NGS-Mature                | .....CAAAGACUGCAAUUUCUUU.....                                                                  | 17  |
| NGS-Mature                | .....AAAGACUGCAAUUUCUUUUGC.....                                                                | 5   |
| NGS-Star                  | .....CAAAAUAUUGGUGUUUUUU.....                                                                  | 5   |
| NGS-Mature                | .....CAAAGACUGCAAUUUCUU.....                                                                   | 4   |
| NGS-Star                  | .....CAAAAUAUUGGUGUUUUUU.....                                                                  | 2   |
| NGS-Star                  | .....AAAUAUUGGUGUUUUUU.....                                                                    | 1   |
| hsa-mir-561 MI0003567     | CUUCAUCCACCAGUCCUCCAGGAACAUCAGGAUCUUUAAACUUUGCCAGAGCUACAAGGCAAAGUUUAAGAUCUUUGAAGUCCUGGGGAACCAU |     |
|                           | (((((.....))))))                                                                               |     |
| hsa-miR-561 MIMAT0003225  | .....CAAAGUUUAAGAUCUUUUAAGU.....                                                               |     |
| NGS-Star                  | .....AUCAAGGAUCUUUAACUUUGCC.....                                                               | 600 |
| NGS-Star                  | .....AUCAAGGAUCUUUAACUUUGC.....                                                                | 157 |
| NGS-Mature                | .....CAAAGUUUAAGAUCUUUUAAGU.....                                                               | 63  |
| NGS-Star                  | .....AUCAAGGAUCUUUAACUUUG.....                                                                 | 41  |
| NGS-Star                  | .....AUCAAGGAUCUUUAACUUU.....                                                                  | 17  |
| NGS-Star                  | .....AAGGAUCUUUAACUUUGCC.....                                                                  | 11  |
| NGS-Star                  | .....AUCAAGGAUCUUUAACUUUGCCA.....                                                              | 6   |
| NGS-Star                  | .....AGGAUCUUUAACUUUGCC.....                                                                   | 3   |
| NGS-Star                  | .....AUCAAGGAUCUUUAACUU.....                                                                   | 2   |
| NGS-Star                  | .....CAUCAAGGAUCUUUAACUUUGC.....                                                               | 2   |
| NGS-Mature                | .....CAAAGUUUAAGAUCUUUUAAGUU.....                                                              | 2   |
| NGS-Mature                | .....CAAAGUUUAAGAUCUUUGA.....                                                                  | 1   |
| NGS-Mature                | .....AAAGUUUAAGAUCUUUUAAGU.....                                                                | 1   |
| NGS-Star                  | .....AAGGAUCUUUAACUUUGC.....                                                                   | 1   |
| NGS-Mature                | .....CAAAGUUUAAGAUCUUUUAAGUUC.....                                                             | 1   |
| NGS-Mature                | .....AAAGUUUAAGAUCUUUUAAGUU.....                                                               | 1   |



```

NGS-Star .....UGGAAACAUUUCUGCACAAAC..... 1

hsa-mir-3121 MI0014137 AAAUGGUUAUGUCCUUUCCUAUUUCUUAUUUAAGACACCCUGUACCUUAAAUAAGAGUAGGCAAAGGACGAAACAUUU
((((((((((((((((((((((((((((((((((((((((((((((((((((((((((((((((((((((((((((((((((((((((((((((((
hsa-miR-3121 MIMAT0014983 .....UAAUAAGAGUAGGCAAAGGACA.....
NGS-Mature .....UAAUAAGAGUAGGCAAAGGACA..... 170
NGS-Mature .....UAAUAAGAGUAGGCAAAG..... 87
NGS-Mature .....UAAUAAGAGUAGGCAAAGG..... 62
NGS-Mature .....UAAUAAGAGUAGGCAAAGGAC..... 18
NGS-Mature .....UAAUAAGAGUAGGCAAAGGA..... 11
NGS-Mature .....AAUAGAGUAGGCAAAGGACAGA..... 6
NGS-Mature .....AAUAGAGUAGGCAAAGGACA..... 1
NGS-Mature .....UAAUAAGAGUAGGCAAAGGACAG..... 1
NGS-Mature .....UAAUAAGAGUAGGCAAAGGACAGA..... 1
NGS-Star .....UCCUUUGCCUAUUUCUUAUUUAAG..... 1
NGS-Mature .....AAAUAAGAGUAGGCAAAGGA..... 1

hsa-mir-3140 MI0014163 CCUCUUGAGGUACCCGAAUUACCAAAGCUUUUAUGUAUUUCUGAAGUUUAUUGAAAUAAGAGCUUUUUGGGAAUUCAGGUAGUUCAGGAGUG
((((((((((((((((((((((((((((((((((((((((((((((((((((((((((((((((((((((((((((((((((((((((((((((((
hsa-miR-3140 MIMAT0015008 .....AGCUUUUGGGAAUUCAGGUAGU.....
NGS-Mature .....AGCUUUUGGGAAUUCAGGUAG..... 193
NGS-Mature .....AGCUUUUGGGAAUUCAGGUAGU..... 52
NGS-Mature .....AGCUUUUGGGAAUUCAGGUAGU..... 34
NGS-Mature .....AGAGCUUUUGGGAAUUCAGGUAGU..... 29

NGS-Mature .....GAGCUUUUGGGAAUUCAGGUAGU..... 26
NGS-Star .....ACCUGAAUUACCAAAGCUUU..... 26
NGS-Mature .....GAGCUUUUGGGAAUUCAGGUAG..... 18
NGS-Mature .....AAGAGCUUUUGGGAAUUCAGGUAGU..... 17
NGS-Mature .....AGAGCUUUUGGGAAUUCAGGUAGU..... 17
NGS-Mature .....AAGAGCUUUUGGGAAUUCAGGU..... 13
NGS-Mature .....GAGCUUUUGGGAAUUCAGGUAGU..... 13
NGS-Star .....ACCUGAAUUACCAAAGC..... 7
NGS-Star .....ACCUGAAUUACCAAAGCUU..... 1
NGS-Star .....AUUACCAAAGCUUUUAUGU..... 1
NGS-Star .....ACCUGAAUUACCAAAGCUUUA..... 1

hsa-mir-372 MI0000780 GUGGGCCUCAAUUGUGGAGCACUAUUCUGAUGUCCAAGUGGAAAGUGCUGCGACAUUUGAGCGUCAC
..((((((((((((((((((((((((((((((((((((((((((((((((((((((((((((((((((((((((((((((((((((((((((((((((
hsa-miR-372 MIMAT0000724 .....AAAGUCUGCGACAUUUGAGCGU...
NGS-Mature .....AAAGUCUGCGACAUUUGAGCGU... 16175
NGS-Mature .....AAGUCUGCGACAUUUGAGCGU... 10483
NGS-Mature .....AAAGUCUGCGACAUUUGAGCG... 1030
NGS-Mature .....AAAGUCUGCGACAUUUGA..... 882
NGS-Mature .....AAGUCUGCGACAUUUGA..... 501
NGS-Mature .....AAGUCUGCGACAUUUGAGCG... 487
NGS-Mature .....AAAGUCUGCGACAUUUGAG... 432
NGS-Mature .....AAAGUCUGCGACAUUUG... 359
NGS-Mature .....AAGUCUGCGACAUUUGAGC... 349
NGS-Mature .....AAGUCUGCGACAUUUGAGC... 187
NGS-Star .....CCUCAAUUGUGGAGCACUAUUC..... 21
NGS-Star .....CCUCAAUUGUGGAGCACUAUUC..... 12
NGS-Star .....CCUCAAUUGUGGAGCACUAU... 2
NGS-Star .....CCUCAAUUGUGGAGCACU..... 1
NGS-Star .....CCUCAAUUGUGGAGCACUA..... 1

hsa-mir-433 MI0001723 CCGGGGAGAAGUACGGUGAGCCUGUCAUUUAUUCAGAGAGGCUAGAUCCUCUGUUGAGAAGGAUCAUGAUGGGCUCUCCGGUUCUCCAGG
((.((((((((((((((((((((((((((((((((((((((((((((((((((((((((((((((((((((((((((((((((((((((((((((
hsa-miR-433 MIMAT0001627 .....AUCAUGAGGGCUCUCCGGUGU.....
NGS-Mature .....AUCAUGAGGGCUCUCCGGUGU..... 36335
NGS-Mature .....AUCAUGAGGGCUCUCCGGUG..... 2827
NGS-Mature .....AUCAUGAGGGCUCUCCGGU..... 1647
NGS-Mature .....AUCAUGAGGGCUCUCCGGUGU..... 1496
NGS-Mature .....UCAUGAGGGCUCUCCGGUGU..... 1342
NGS-Star .....UACGGUGAGCCUGUCAUUUAU..... 527
NGS-Mature .....AUCAUGAGGGCUCUCCGG..... 398
NGS-Star .....UACGGUGAGCCUGUCAUUUAUC..... 299
NGS-Mature .....AUGAGGGCUCUCCGGUGU..... 239
NGS-Mature .....UCAUGAGGGCUCUCCGGUG..... 198
NGS-Mature .....GAUCAUGAGGGCUCUCCGGUGU..... 136
NGS-Mature .....AUCAUGAGGGCUCUCCGG..... 126
NGS-Star .....UACGGUGAGCCUGUCAUUU..... 95
NGS-Star .....UACGGUGAGCCUGUCAU..... 12
NGS-Star .....UACGGUGAGCCUGUCAUUUAUC..... 11
NGS-Star .....UACGGUGAGCCUGUCAUU..... 8
NGS-Star .....GUGAGCCUGUCAUUUAUC..... 3
NGS-Star .....ACGGUGAGCCUGUCAUUUAUC..... 2
NGS-Star .....CAGAGGGCUAGAUCC..... 1
NGS-Star .....UACGGUGAGCCUGUCAUUUAUCAG..... 1

```





```

NGS-Star .....AUGCAGACUCUUGGUUUU..... 1
NGS-Mature .....GAGUCCAGGAAUCUGCAUUUA..... 1
NGS-Star .....AUGCAGACUCUUGGUUUUCCACC..... 1
NGS-Star .....AUGCAGACUCUUGGUUUUCCACCCC..... 1
NGS-Mature .....GUGGAGUCCAGGAAUCUGCAUUU..... 1
NGS-Star .....AUGCAGACUCUUGGUUUUCCACCC..... 1
NGS-Star .....AAUGCAGACUCUUGGUUUUCCACC..... 1
NGS-Star .....AAUGCAGACUCUUGGUUUUCCAC..... 1
NGS-Mature .....GGUGGAGUCCAGGAAUCUGCAU..... 1
NGS-Mature .....UGGAGUCCAGGAAUCUGCAUUUA..... 1

hsa-mir-3138 MI0014161 CCCUCCUCGGCACUUCCCCCACCUCCACUCGCCCGGGUGCCCAAGACUGGACAGUAGAGGGAGUGCCGAGGAGGG
((((((((((((((((((((((((((((((((((((((((((((((((((((((((((((((((((((((((((((
((((((((((((((((((((((((((((((((((((((((((((((((((((((((((((((((((((((((((((
UGUGGACAGUGAGGUUAGAGGGAGU.....
.....ACAGUGAGGUAGAGGGAGUGC..... 93
.....ACAGUGAGGUAGAGGGAGUG..... 83
.....UGUGGACAGUGAGGUUAGAGGGAG..... 31
.....UGUGGACAGUGAGGUUAGAGGGAGU..... 29
.....ACAGUGAGGUUAGAGGGAGU..... 25
.....GACAGUGAGGUUAGAGGGAGUGC..... 19
.....UGUGGACAGUGAGGUUAGAGGGA..... 18
.....GACAGUGAGGUUAGAGGGAGUG..... 16
.....UGGACAGUGAGGUUAGAGGGAGU..... 8
.....UGGACAGUGAGGUUAGAGGGAG..... 7
.....ACUUCCCCCACCUCCACUGCCC..... 2
.....ACUUCCCCCACCUCCACUGCCC..... 1

hsa-mir-3179-1 MI0014213 CAGGAUCACAGACGUUUAAAAUACACUCCUUCUGCUGGCCUUCACAGCAGUAGAAGGGGGUAAAUUUAAACGUCUGAUCCUG
((((((((((((((((((((((((((((((((((((((((((((((((((((((((((((((((((((((((((((
((((((((((((((((((((((((((((((((((((((((((((((((((((((((((((((((((((((((((((
AGAAAGGGGUGAAAUUUAAACGU.....
.....AGAAAGGGGUGAAAUUUAAACGU..... 273
.....UAGAAGGGGUGAAAUUUAAACGU..... 110
.....UAGAAGGGGUGAAAUUUAAACG..... 69
.....AGAAAGGGGUGAAAUUUAAACG..... 49
.....AGGGGUGAAAUUUAAACGU..... 10
.....GGGGUGAAAUUUAAACGU..... 8
.....UUUAAAAUACACUCCUUCUGCU..... 5
.....AGAAAGGGGUGAAAUUUAAACGUC..... 2
.....GAAGGGGUGAAAUUUAAACGU..... 2
.....GUUUAAAAUACACUCCUUCUGC..... 2
.....AAGGGGUGAAAUUUAAACGU..... 1
.....AGGGGUGAAAUUUAAACG..... 1
.....AGGAUCACAGACGUUUAAAAU..... 1
.....GUUUAAAAUACACUCCUUCUG..... 1

hsa-mir-3179-2 MI0014216 CAGGAUCACAGACGUUUAAAAUACACUCCUUCUGCUGGCCUUCACAGCAGUAGAAGGGGGUAAAUUUAAACGUCUGAUCCUG
((((((((((((((((((((((((((((((((((((((((((((((((((((((((((((((((((((((((((((
((((((((((((((((((((((((((((((((((((((((((((((((((((((((((((((((((((((((((((
AGAAAGGGGUGAAAUUUAAACGU.....
.....AGAAAGGGGUGAAAUUUAAACGU..... 273
.....UAGAAGGGGUGAAAUUUAAACGU..... 110
.....UAGAAGGGGUGAAAUUUAAACG..... 69
.....AGAAAGGGGUGAAAUUUAAACG..... 49
.....AGGGGUGAAAUUUAAACGU..... 10
.....GGGGUGAAAUUUAAACGU..... 8
.....UUUAAAAUACACUCCUUCUGCU..... 5
.....AGAAAGGGGUGAAAUUUAAACGUC..... 2
.....GAAGGGGUGAAAUUUAAACGU..... 2
.....GUUUAAAAUACACUCCUUCUGC..... 2
.....AAGGGGUGAAAUUUAAACGU..... 1
.....AGGGGUGAAAUUUAAACG..... 1
.....AGGAUCACAGACGUUUAAAAU..... 1
.....GUUUAAAAUACACUCCUUCUG..... 1

hsa-mir-3179-3 MI0014221 CAGGAUCACAGACGUUUAAAAUACACUCCUUCUGCUGGCCUUCACAGCAGUAGAAGGGGGUAAAUUUAAACGUCUGAUCCUG
((((((((((((((((((((((((((((((((((((((((((((((((((((((((((((((((((((((((((((
((((((((((((((((((((((((((((((((((((((((((((((((((((((((((((((((((((((((((((
AGAAAGGGGUGAAAUUUAAACGU.....
.....AGAAAGGGGUGAAAUUUAAACGU..... 273
.....UAGAAGGGGUGAAAUUUAAACGU..... 110
.....UAGAAGGGGUGAAAUUUAAACG..... 69
.....AGAAAGGGGUGAAAUUUAAACG..... 49
.....AGGGGUGAAAUUUAAACGU..... 10
.....GGGGUGAAAUUUAAACGU..... 8
.....UUUAAAAUACACUCCUUCUGCU..... 5
.....AGAAAGGGGUGAAAUUUAAACGUC..... 2
.....GAAGGGGUGAAAUUUAAACGU..... 2
.....GUUUAAAAUACACUCCUUCUGC..... 2
.....AAGGGGUGAAAUUUAAACGU..... 1
.....AGGGGUGAAAUUUAAACG..... 1
.....AGGAUCACAGACGUUUAAAAU..... 1
.....GUUUAAAAUACACUCCUUCUG..... 1

```

```

hsa-mir-3116-1 MI0014128 CUUUUUGAGUCCUACUAGUUGCCAGGCACUGGUUUCGUAGGUGCCUGGAACAUAGUAGGGACUCAUUAAAG
((((((((((((((((((((((((((((((((((((((((((((((((((((((((((((((((((((((((
((((((((((((((((((((((((((((((((((((((((((((((((((((((((((((((((((((((((
.UGCCUGGAACAUAGUAGGGACU..... 57
NGS-Mature .UGCCUGGAACAUAGUAGGGACU..... 10
NGS-Mature .UGCCUGGAACAUAGUAGGGACU..... 6
NGS-Mature .UGCCUGGAACAUAGUAGGGACU..... 6
NGS-Star UCCCUACUAGUUC CAGGCACU..... 3
NGS-Mature .UGCCUGGAACAUAGUAGGGACU..... 2
NGS-Mature .GCCUGGAACAUAGUAGGGACU..... 2
NGS-Mature .UGGAACAUAGUAGGGACUCA..... 2
NGS-Mature .CCUGGAACAUAGUAGGGACUCA..... 1
NGS-Mature .UCCCUACUAGUUC CAGGCACU..... 1
NGS-Mature .UGGAACAUAGUAGGGACUCAAU..... 1
NGS-Mature .CCUGGAACAUAGUAGGGACU..... 1

hsa-mir-3116-2 MI0014129 UAUUUGAGUCCUACUAGUUGCCAGGCACUACGAUCCAGUGCCUGGAACAUAGUAGGGACUCAUA
((((((((((((((((((((((((((((((((((((((((((((((((((((((((((((((((((((((((
((((((((((((((((((((((((((((((((((((((((((((((((((((((((((((((((((((((((
.UGCCUGGAACAUAGUAGGGACU..... 57
NGS-Mature .UGCCUGGAACAUAGUAGGGACU..... 10
NGS-Mature .UGCCUGGAACAUAGUAGGGACU..... 6
NGS-Mature .UGCCUGGAACAUAGUAGGGACU..... 3
NGS-Mature .GCCUGGAACAUAGUAGGGACU..... 2
NGS-Mature .UGGAACAUAGUAGGGACUCA..... 2
NGS-Mature .CCUGGAACAUAGUAGGGACUCA..... 1
NGS-Mature .CCUGGAACAUAGUAGGGACU..... 1
NGS-Mature .UGGAACAUAGUAGGGACUCAAU..... 1
NGS-Star UCCCUACUAGUUC CAGGCACU..... 1

hsa-mir-370 MI0000778 AGACAGAGAAGCCAGGUCACGUCUCUCGAGUUACACAGCUCACGAGUGCCUGCUGGGUGGAACCUGGUCUGUCU
((((((((((((((((((((((((((((((((((((((((((((((((((((((((((((((((((((((((
((((((((((((((((((((((((((((((((((((((((((((((((((((((((((((((((((((((((
.UGCCUGGAACAUAGUAGGGACU..... 508
NGS-Mature .GCCUGCUGGGUGGAACCUGG..... 300
NGS-Mature .GCCUGCUGGGUGGAACCUGG..... 172
NGS-Mature .GCCUGCUGGGUGGAACCUGG..... 158
NGS-Star CAGGUCACGUCUCUCGAGUUAC..... 61
NGS-Star CAGGUCACGUCUCUCGAGUUAC..... 42
NGS-Star CAGGUCACGUCUCUCGAGUUUA..... 41
NGS-Star CAGGUCACGUCUCUCGAGUUAC..... 31
NGS-Mature .GCCUGCUGGGUGGAACC..... 27
NGS-Mature .GCCUGCUGGGUGGAACCUGGUCU..... 15
NGS-Star .AAGCCAGGUCACGUCUCUCAG..... 8
NGS-Mature .GCCUGCUGGGUGGAACCUGGUC..... 7
NGS-Mature .UGCCUGCUGGGUGGAACCUGG..... 5
NGS-Star .AAGCCAGGUCACGUCUCUCGA..... 5
NGS-Mature .CUGCUGGGUGGAACCUGG..... 5
NGS-Mature .UGCCUGCUGGGUGGAACCU..... 4
NGS-Star .CAGGUCACGUCUCUCGAGUU..... 4
NGS-Star .AAGCCAGGUCACGUCUCUCAGU..... 3
NGS-Star .CCAGGUCACGUCUCUCGAGUU..... 2
NGS-Star .AGGUCACGUCUCUCGAGUUAC..... 2

hsa-mir-376a-2 MI0003529 GGUUUUUAAAAGGUAUUUUUUUUUUUUAUGGUUACGUGUUUGAUGGUUAAUCAUAGAGGAAAAUCCACGUUUUCAGUAUC
((((((((((((((((((((((((((((((((((((((((((((((((((((((((((((((((((((((((
((((((((((((((((((((((((((((((((((((((((((((((((((((((((((((((((((((((((
.AUCAUAGAGGAAAAUCCACGU..... 1737
NGS-Mature .AUCAUAGAGGAAAAUCCACGU..... 205
NGS-Mature .AUCAUAGAGGAAAAUCCACG..... 155
NGS-Mature .AAUCAUAGAGGAAAAUCCACGU..... 149
NGS-Mature .AUCAUAGAGGAAAAUCCA..... 142
NGS-Mature .AUCAUAGAGGAAAAUCCAC..... 106
NGS-Star GUAGAUUUUUUUUUUUUUUAUGGUUA..... 42
NGS-Mature .AUAGAGGAAAAUCCACGU..... 33
NGS-Mature .AUCAUAGAGGAAAAUCCACGUUU..... 23
NGS-Mature .AAUCAUAGAGGAAAAUCCACG..... 13
NGS-Mature .AUAGAGGAAAAUCCACGUUU..... 11
NGS-Star GUAGAUUUUUUUUUUUUUUAUGGUU..... 6
NGS-Star .GGUAGAUUUUUUUUUUUUUUAUGGUU..... 5
NGS-Star .GUAGAUUUUUUUUUUUUUUAUGGU..... 3
NGS-Star .GGUAGAUUUUUUUUUUUUUUAUGGUUA..... 2
NGS-Star .GUAGAUUUUUUUUUUUUUUAUGG..... 2
NGS-Star .UAGAUUUUUUUUUUUUUUAUGGUUA..... 1

hsa-mir-376b MI0002466 CAGUCCUUCUUGGUAUUUUAAAACGGGAUAUUCUUCUAUGUUUACGUAUCCUGGUUAAUCAUAGAGGAAAAUCCAGUUUCAGUAUCAAAUGCUG
((((((((((((((((((((((((((((((((((((((((((((((((((((((((((((((((((((((((
((((((((((((((((((((((((((((((((((((((((((((((((((((((((((((((((((((((((
.AUCAUAGAGGAAAAUCCAGUU..... 1223
NGS-Mature .AUCAUAGAGGAAAAUCCAGU..... 1223

```



hsa-mir-1286 MI0006348 UGUCCUUGGGGACUCAGCUGUCUCUGGCCUGCGUGGAUUGAAUUAGCUGCAGGCCAAGAUGAGCCUUGGUGGAGACA  
 ..(((.(.(((.(((.((((.((((.((((.(.....))))))..)))..)))..)))..)))..))....  
 hsa-miR-1286 MIMAT0005877 .....UGCAGGACCAAGAUGAGCCU.....  
 NGS-Mature .....UGCAGGACCAAGAUGAGCCU..... 172  
 NGS-Mature .....UGCAGGACCAAGAUGAGCC..... 113  
 NGS-Mature .....UGCAGGACCAAGAUGAGCCUU..... 92  
 NGS-Mature .....UGCAGGACCAAGAUGAGCC..... 63  
 NGS-Mature .....UGCAGGACCAAGAUGAGC..... 20  
 NGS-Star .....ACUCAGCUUGCCUGGCUCGU..... 10  
 NGS-Star .....GACUCAGCUUGCCUGGCUCG..... 3  
 NGS-Mature .....CUCGAGGACCAAGAUGAGCC..... 3  
 NGS-Star .....GACUCAGCUUGCCUGGCUCGU..... 1  
 NGS-Mature .....CUCGAGGACCAAGAUGAGCCU..... 1  
 NGS-Star .....UCUGGGACUCAGCUGUCUCUGGC..... 1  
 NGS-Mature .....GCAGGACCAAGAUGAGCC..... 1  
 NGS-Mature .....GCAGGACCAAGAUGAGCCU..... 1

hsa-mir-1295 MI0006357 AGGACAUUUUGCCAGAUCCGUGCCUAUUCAGAAUUGGGCCUGUGAUUAGGCGCAGAUUCUGGUGAAAUGUCCUC  
 ((((((((((.(((.(((.(((.(((.(((.(.....))))..)))..)))..)))..)))..)))..))....  
 hsa-miR-1295 MIMAT0005885 .....UUAGCCGCAGAUUCUGGUGA.....  
 NGS-Mature .....UUAGCCGCAGAUUCUGGUGA..... 193  
 NGS-Mature .....UUAGCCGCAGAUUCUGGUGAA..... 53  
 NGS-Mature .....UUAGCCGCAGAUUCUGGUG..... 25  
 NGS-Mature .....UUAGCCGCAGAUUCUGGUGAAA..... 18  
 NGS-Mature .....UUAGCCGCAGAUUCUGGUGA..... 15  
 NGS-Mature .....UUAGCCGCAGAUUCUGGUG..... 6  
 NGS-Mature .....UUAGCCGCAGAUUCUGGUGAAU..... 5  
 NGS-Mature .....UUAGCCGCAGAUUCUGG..... 2  
 NGS-Mature .....UUAGCCGCAGAUUCUGGUGAA..... 1  
 NGS-Star .....UGCCAGAUCCGUGCCUAUUC..... 1  
 NGS-Mature .....UUAGCCGCAGAUUCUGG..... 1

hsa-mir-133b MI000822 CCUCAGAAGAAAGAUCCUUGCCUGUCUGGCUGGUAACAAACGGAACCAAGUCCGUCUUCUGAGAGGUUUGGUCCCCUUAACACGCUACAGCAGGGCUGGCAUUGCCAGUCCUUGGAGA  
 ((((((((((.(((.(((.(((.(((.(((.(.....))))..)))..)))..)))..)))..)))..))....  
 hsa-miR-133b MIMAT0000770 .....UUUGGUCCCUUAACACGCUA.....  
 NGS-Mature .....UUUGGUCCCUUAACACGCU..... 53  
 NGS-Mature .....UUUGGUCCCUUAACACG..... 38  
 NGS-Mature .....UUUGGUCCCUUAACACGCU..... 16  
 NGS-Mature .....UUUGGUCCCUUAACACG..... 9  
 NGS-Mature .....UUUGGUCCCUUAACACG..... 6  
 NGS-Mature .....UUUGGUCCCUUAACCA..... 1  
 NGS-Star .....GCUGGUCAAACGGAACCAAGU..... 1  
 NGS-Mature .....UUUGGUCCCUUAACACG..... 1  
 NGS-Mature .....UUUGGUCCCUUAACACGCUA..... 1

hsa-mir-3177 MI0014211 CCACGUGCCAUGUGUACACACGUGCCAGGCGCUGUCUUGAGACAUUCGCGCAGUGCACGGCACUGGGGACACGUGGCACUGG  
 ((((((((((.(((.(((.(((.(((.(((.(.....))))..)))..)))..)))..)))..)))..))....  
 hsa-miR-3177 MIMAT0015054 .....UGCACGGCACUGGGGACACGU.....  
 NGS-Mature .....UGCACGGCACUGGGGACACGU..... 72  
 NGS-Mature .....UGCACGGCACUGGGGACACG..... 14  
 NGS-Mature .....UGCACGGCACUGGGGACACGUG..... 14  
 NGS-Mature .....GUGCACGGCACUGGGGACACGU..... 3  
 NGS-Star .....UGUGUACACACGUGCCAGGCGCU..... 2  
 NGS-Mature .....UGCACGGCACUGGGGACAC..... 2  
 NGS-Star .....UGUGUACACACGUGCCAGGCGUG..... 2  
 NGS-Star .....UGUGUACACACGUGCCAGGCGC..... 1  
 NGS-Mature .....GUCUUGAGACAUUCGCGCAG..... 1  
 NGS-Mature .....AGUGCACGGCACUGGGGACAC..... 1

hsa-mir-489 MI0003124 GUGGCAGCUUGGUGGUCGUAGUGUGAGCCCAUUUAACUUGAACCUUUGAGGUGACAUACAUAUACGGCAGCUAACUGCUAC  
 ((((((((((.(((.(((.(((.(((.(((.(.....))))..)))..)))..)))..)))..)))..))....  
 hsa-miR-489 MIMAT0002805 .....GUGACAUACAUAUACGGCAGC.....  
 NGS-Mature .....GUGACAUACAUAUACGG..... 143  
 NGS-Mature .....GUGACAUACAUAUACGGCAGC..... 53  
 NGS-Mature .....GUGACAUACAUAUACGGCAG..... 27  
 NGS-Mature .....GUGACAUACAUAUACGGCA..... 16  
 NGS-Mature .....UGACAUACAUAUACGGCAGCU..... 7  
 NGS-Mature .....UGACAUACAUAUACGGCAG..... 7  
 NGS-Star .....UGGUCGUAGUGUGACGCCAU..... 6  
 NGS-Mature .....UGACAUACAUAUACGGCAGC..... 4  
 NGS-Mature .....AGUGACAUACAUAUACGG..... 3  
 NGS-Star .....GGUCGUAGUGUGACGCCAUU..... 3  
 NGS-Mature .....AGUGACAUACAUAUACGGCAGC..... 2  
 NGS-Star .....GGUCGUAGUGUGACGCCAUU..... 2  
 NGS-Mature .....GUGACAUACAUAUACGGC..... 2  
 NGS-Star .....GGUCGUAGUGUGACGCCA..... 1  
 NGS-Star .....GGUCGUAGUGUGACGCC..... 1  
 NGS-Star .....UGGUCGUAGUGUGACGCCAU..... 1

hsa-mir-580 MI0003587 AUAAAAUUUCAAUUGGAAUCAAUGAUUCAACAGACUCAGAUAAUUAAGUUAACAGUAAUUGAGAAUGAUAUAUAGGUUCCGGUCAGAAUU



hsa-mir-518b MI0003156 UCAUGCUGUGGCCUCCAGAGGGGAAAGCGCUUUUCUGUUGUCUGAAGAAACAAAGCGCUCCUUUAGAGUUUACGGUUUGA  
(((.(((.(.(.(.(.(.(.(.(.(((.(.(.(.(.(.(.(.(.(.((.....)))))))))))).)))))))).)))  
hsa-miR-518b MIMAT0002844 .....CAAAGCGUCCUUUAGAGGU..... 372  
NGS-Mature .....CAAAGCGUCCUUUAGAGGU..... 72  
NGS-Mature .....CAAAGCGUCCUUUAGAGGU..... 38  
NGS-Mature .....CAAAGCGUCCUUUAGA..... 32  
NGS-Mature .....CAAAGCGUCCUUUAGAG..... 23  
NGS-Mature .....CAAAGCGUCCUUUAG..... 16  
NGS-Mature .....AAAGCGUCCUUUAGAGGU..... 7  
NGS-Mature .....CAAAGCGUCCUUUAGAGGU..... 7  
NGS-Mature .....AAAGCGUCCUUUAGAGGU..... 3  
NGS-Star .....CUCCAGAGGGAAAGCGCUUUUCUGU..... 3  
NGS-Star .....CUCCAGAGGGAAAGCGCUUUUCUG..... 1  
NGS-Mature .....ACAAAGCGUCCUUUAGAGGU..... 1  
  
hsa-mir-519d MI0003162 UCCCAUGCUGUGACCCUCCAAGGGAAGCGCUUUUCUGUUUUUCUUUAACAAGAGUCCUUUAGAGUUUACGGUUUGGA  
(((.(.(.(.(.(.(.(.(.(((.(.(.(.(.(.(.(.(.(.((.....)))))))))))).)))))))).)))  
hsa-miR-519d MIMAT0002853 .....CAAAGUCCUUUAGAGGU..... 117  
NGS-Mature .....CAAAGUCCUUUAGAGGU..... 6  
NGS-Mature .....CAAAGUCCUUUAGAGGU..... 6  
NGS-Mature .....CAAAGUCCUUUAGAGGU..... 6  
NGS-Mature .....CAAAGUCCUUUAGAG..... 4  
NGS-Mature .....CAAAGUCCUUUAGA..... 3  
NGS-Mature .....ACAAAGUCCUUUAGAGGU..... 3  
NGS-Mature .....AAAGUCCUUUAGAGGU..... 3  
NGS-Mature .....CAAAGUCCUUUAGAGU..... 3  
NGS-Mature .....ACAAAGUCCUUUAGAGU..... 3  
NGS-Mature .....CAAAGUCCUUUAG..... 2  
NGS-Star .....CUCCAAAGGGAAGCGCUUUUCUG..... 2  
NGS-Star .....CUCCAAAGGGAAGCGCUUUUC..... 1  
NGS-Star .....CUCCAAAGGGAAGCGCUUUUC..... 1  
NGS-Star .....CUCCAAAGGGAAGCGCUUUUC..... 1  
  
hsa-mir-656 MI0003678 CUGAAUAGGUUGCCUGUGAGGUUCACUUUCUUAUGAUGAAUUAUACAGUCAACCUUUCUGAUUCGAAUC  
..(((.(((.(.(.(.(.(.(.(.(.(((.(.(.(.(.(.(.(.(.(.((.....)))))))))))).)))))))).)))  
hsa-miR-656 MIMAT0003332 .....AAUUAUACAGUCAACCU..... 724  
NGS-Mature .....AAUUAUACAGUCAACCU..... 96  
NGS-Mature .....AAUUAUACAGUCAACCU..... 73  
NGS-Mature .....AAUUAUACAGUCAACC..... 33  
NGS-Star .....AGGUUCCUGUGAGGUUCA..... 11  
NGS-Mature .....AAUUAUACAGUCAACCU..... 9  
NGS-Mature .....AAUUAUACAGUCAACCU..... 4  
NGS-Star .....AGGUUCCUGUGAGGUUU..... 2  
NGS-Mature .....AAUUAUACAGUCAACCUUU..... 2  
NGS-Mature .....AAUUAUACAGUCAACCU..... 2  
NGS-Star .....AAUUAUACAGUCAACCUC..... 2  
NGS-Star .....AGGUUCCUGUGAGGUUC..... 1  
  
hsa-mir-1538 MI0007259 GGGAACAGCAGCAACAUGGGCCUCGUUCCUGCCGGCCTGGCCGGGGCUGCUGCUGUCCU  
(((.(.(.(.(.(.(.(.(.(((.(.(.(.(.(.(.(.(.(.((.....)))))))))))).)))))))).)))  
hsa-miR-1538 MIMAT0007400 .....CGGCCGGGUGCUGCUGUCCU..... 13  
NGS-Star .....AACAGCAGCAACAUGGGCCUCG..... 2  
NGS-Mature .....ACAGCAGCAACAUGGGCCUCG..... 2  
NGS-Star .....CGGCCGGGUGCUGCUGUU..... 2  
NGS-Mature .....GCGGCCGGGUGCUGU..... 2  
NGS-Mature .....CGGCCGGGUGCUGU..... 1  
NGS-Star .....AGCAGCAACAUGGGCCUCG..... 1  
NGS-Mature .....CGGCCGGGUGCUGU..... 1  
NGS-Star .....AACAGCAGCAACAUGGGCCU..... 1  
NGS-Star .....AACAGCAGCAACAUGGGCCUC..... 1  
NGS-Mature .....GCCGCCGGCCCGGGCUG..... 1  
NGS-Mature .....GCGGCCGGGUGCUGU..... 1  
NGS-Star .....CUCGUUCCUGCCGGC..... 1  
NGS-Mature .....GCGGCCGGGUGCUGU..... 1  
NGS-Star .....GGGAACAGCAGCAACAUGGGCC..... 1  
NGS-Mature .....UCGUUCCUGCCGGC..... 1  
  
hsa-mir-1913 MI0008334 ACCUCUACCCUCCGGCAGAGGGUGCAGAGCGUGGUUCUCAAACUCUGCCCCCUGCUGGCCAAGUGGUCUGU  
(((.(.(.(.(.(.(.(.(.(((.(.(.(.(.(.(.(.(.(.((.....)))))))))))).)))))))).)))  
hsa-miR-1913 MIMAT0007888 .....UCUGCCCCUCGCGUGCCA..... 17  
NGS-Star .....CCGGCAGAGGAGCUGCAGAG..... 6  
NGS-Mature .....UCUGCCCCUCGCGUGCCA..... 3  
NGS-Star .....CCGGCAGAGGAGCUGCAGAG..... 3  
NGS-Star .....CCGGCAGAGGAGCUGCAGAG..... 2  
NGS-Mature .....UCUGCCCCUCGCGUG..... 1  
NGS-Mature .....UCUGCCCCUCGCGUG..... 1

```

hsa-mir-3160-1 MI0014189 GGACCUGCCCUGGGCUUUCUAGUCUCAGCUCUCCUCCAGCUCAGCUGGUCAGGAGAGCUGAGACUAGAAAGCCAGGGCAGGUUC
((((((((((((((((((((((((((((((((((((((((((((((((((((((((((((((((((((((((((((((((((((((((((((
hsa-miR-3160 MIMAT0015034 .....AGAGCUGAGACUAGAAAGCCCA.....
NGS-Mature .....AGAGCUGAGACUAGAAAGCCCA..... 29
NGS-Mature .....AGAGCUGAGACUAGAAAGCCC..... 26
NGS-Mature .....AGAGCUGAGACUAGAAAGCC..... 21
NGS-Mature .....AGAGCUGAGACUAGAAAGC..... 4
NGS-Mature .....GAGAGCUGAGACUAGAAAGCC..... 3
NGS-Mature .....AGAGCUGAGACUAGAAAG..... 2
NGS-Mature .....AGAGCUGAGACUAGAAAGCCCA..... 2
NGS-Mature .....GAGAGCUGAGACUAGAAAG..... 2
NGS-Mature .....AGACUAGAAAGCCAGGGCA..... 1
NGS-Mature .....GAGAGCUGAGACUAGAAAGCCCA..... 1
NGS-Star .....GGCUUUCUAGUCUCAGCUCUCC..... 1

hsa-mir-3160-2 MI0014190 ACCUGCCCUGGGCUUUCUAGUCUCAGCUCUCCUCCAGCUCAGCUGGAGGAGAGCUGAGACUAGAAAGCCAGGGCAGGU
((((((((((((((((((((((((((((((((((((((((((((((((((((((((((((((((((((((((((((((((((((((((((((
hsa-miR-3160 MIMAT0015034 .....AGAGCUGAGACUAGAAAGCCCA.....
NGS-Mature .....AGAGCUGAGACUAGAAAGCCCA..... 29
NGS-Mature .....AGAGCUGAGACUAGAAAGCCC..... 26
NGS-Mature .....AGAGCUGAGACUAGAAAGCC..... 21
NGS-Mature .....AGAGCUGAGACUAGAAAGC..... 4
NGS-Mature .....GAGAGCUGAGACUAGAAAGCC..... 3
NGS-Mature .....AGAGCUGAGACUAGAAAG..... 2
NGS-Mature .....AGAGCUGAGACUAGAAAGCCCA..... 2
NGS-Mature .....GAGAGCUGAGACUAGAAAG..... 2
NGS-Mature .....AGACUAGAAAGCCAGGGCA..... 1
NGS-Mature .....GAGAGCUGAGACUAGAAAGCCCA..... 1
NGS-Star .....GGCUUUCUAGUCUCAGCUCUCC..... 1

hsa-mir-548x MI0014244 AGGUUAGUGCAAAGUAAUUGCAGUUUUUGCGUUACUUUCAAUCGUAACAAACUGCAAUUACUUUCACACCAAUCU
((((((((((((((((((((((((((((((((((((((((((((((((((((((((((((((((((((((((((((((((((((((((((((
hsa-miR-548x MIMAT0015081 .....UAAAAACUGCAAUUACUUUCA.....
NGS-Mature .....UAAAAACUGCAAUUACUUUCA..... 903
NGS-Mature .....UAAAAACUGCAAUUACUUUCAC..... 806
NGS-Mature .....UAAAAACUGCAAUUACUUUC..... 88
NGS-Mature .....AAAAACUGCAAUUACUUU..... 59
NGS-Mature .....UAAAAACUGCAAUUACUUU..... 47
NGS-Mature .....UAAAAACUGCAAUUACUUUCACA..... 37
NGS-Star .....AAAAGUAAUUGCAGUUUUU..... 28
NGS-Star .....AAAAGUAAUUGCAGUUUUUGC..... 28
NGS-Star .....AAAAGUAAUUGCAGUUUUUGCG..... 23

NGS-Mature .....UAAAAACUGCAAUUACUU..... 23
NGS-Star .....AAAAGUAAUUGCAGUUUUU..... 22
NGS-Star .....CAAAGUAAUUGCAGUUUUUGC..... 19
NGS-Mature .....AAAAACUGCAAUUACUUUCACA..... 19
NGS-Mature .....AAAAACUGCAAUUACUUUCA..... 17
NGS-Star .....AAAAGUAAUUGCAGUUUUUG..... 16
NGS-Mature .....AAAAACUGCAAUUACUUUCAC..... 11
NGS-Star .....CAAAGUAAUUGCAGUUUUU..... 11
NGS-Star .....CAAAGUAAUUGCAGUUUUUG..... 8
NGS-Star .....CAAAGUAAUUGCAGUUUUU..... 7
NGS-Star .....CAAAGUAAUUGCAGUUUU..... 5

hsa-mir-585 MI0003592 UGGGGUGUCUGUGCUAUGGCAGCCUAGCACACAGAUACGCCAGAGAAAGCCUGAACGUUGGGCGUAUCUGUAUGCUAGGGCUGCUUAACAA
((((((((((((((((((((((((((((((((((((((((((((((((((((((((((((((((((((((((((((((((((((((((((((
hsa-miR-585 MIMAT0003250 .....UGGGCGUAUCUGUAUGCUA.....
NGS-Mature .....UGGGCGUAUCUGUAUGCUAGGG..... 135
NGS-Star .....CUAGCACACAGAUACGCCACA..... 49
NGS-Mature .....UGGGCGUAUCUGUAUGCUAGG..... 39
NGS-Star .....CUAGCACACAGAUACGCCAG..... 11
NGS-Mature .....UUGGGCGUAUCUGUAUGCUAGGG..... 10
NGS-Mature .....UGGGCGUAUCUGUAUGCUAG..... 9
NGS-Star .....CUAGCACACAGAUACGCCCA..... 6
NGS-Mature .....UGGGCGUAUCUGUAUGCUA..... 5
NGS-Mature .....UGGGCGUAUCUGUAUGCU..... 4
NGS-Mature .....UUGGGCGUAUCUGUAUGCUAGG..... 4
NGS-Star .....UAGCACACAGAUACGCCACA..... 3
NGS-Star .....UAGCACACAGAUACGCCAGAG..... 3
NGS-Mature .....GGGCGUAUCUGUAUGCUAGG..... 1
NGS-Star .....CCUAGCACACAGAUACGCCCC..... 1
NGS-Mature .....UUGGGCGUAUCUGUAUGCUA..... 1
NGS-Mature .....UUGGGCGUAUCUGUAUGCUAG..... 1
NGS-Star .....CUAGCACACAGAUACGCCCC..... 1

hsa-mir-1197 MI0006656 ACUUCUGGUUUUGAAGAUGCGGUAGCAUUGGUGUGUACGCUUUUUUGUGACGUGAGACACAUUGGCUACUUCUUCUCAAUAUCA
((((((((((((((((((((((((((((((((((((((((((((((((((((((((((((((((((((((((((((((((((((((((((((
hsa-miR-1197 MIMAT0005955 .....UAGGACACAUGGUCUACUUCU.....

```



|                           |                                                                                         |      |
|---------------------------|-----------------------------------------------------------------------------------------|------|
| NGS-Mature                | .....UAGGACACAUGGUCUACUUCU.....                                                         | 984  |
| NGS-Mature                | .....UAGGACACAUGGUCUACUUCU.....                                                         | 46   |
| NGS-Mature                | .....UAGGACACAUGGUCUACUUC.....                                                          | 30   |
| NGS-Mature                | .....UAGGACACAUGGUCUACUUC.....                                                          | 30   |
| NGS-Mature                | .....UAGGACACAUGGUCUACU.....                                                            | 3    |
| NGS-Star                  | .....CGGUUGACCAUGGUGUACG.....                                                           | 3    |
| NGS-Mature                | .....GGACACAUGGUCUACUUCU.....                                                           | 2    |
| NGS-Mature                | .....GCUUUUUUUGUGACGUAGGACACA.....                                                      | 2    |
| NGS-Mature                | .....GUGACGUAGGACACAUGGUC.....                                                          | 2    |
| NGS-Mature                | .....UUUGACGUAGGACACAUGGUC.....                                                         | 2    |
| NGS-Mature                | .....GUGACGUAGGACACAUGGUC.....                                                          | 2    |
| NGS-Star                  | .....CUUCCUGGUAUUUGAAGAUG.....                                                          | 1    |
| NGS-Star                  | .....ACUCCUGGUAUUUGAAGAUG.....                                                          | 1    |
|                           |                                                                                         |      |
| hsa-mir-1229 MI0006319    | GUGGGUAGGGUUUGGGGAGAGCGUGGGCUGGGUUCAGGGACACCCUCUACCACUGCCUCCACAG                        |      |
|                           | ((((((((((((((((((((((((((((((((.....))))))))))))))))))))))))))))))                     |      |
| hsa-miR-1229 MIMAT0005584 | .....CUCUCACCACUGCCUCCACAG                                                              |      |
| NGS-Mature                | .....CUCUCACCACUGCCUCCACAG                                                              | 11   |
| NGS-Mature                | .....CUCUCACCACUGCCUCCACA                                                               | 11   |
| NGS-Mature                | .....CUCUCACCACUGCCUCCAC                                                                | 8    |
| NGS-Star                  | GUGGGUAGGGUUUGGGGAGAGCGUG.....                                                          | 6    |
| NGS-Mature                | .....CUCACCACUGCCUCCAC                                                                  | 5    |
| NGS-Mature                | .....UCUCACCACUGCCUCCACAG                                                               | 4    |
| NGS-Mature                | .....CUCUCACCACUGCCUCCCA                                                                | 3    |
| NGS-Star                  | GUGGGUAGGGUUUGGGGAGAG.....                                                              | 3    |
| NGS-Star                  | GUGGGUAGGGUUUGGGGAGAGCGU.....                                                           | 2    |
| NGS-Mature                | .....CCUCUCACCACUGCCUCCCA                                                               | 1    |
| NGS-Mature                | .....CUCACCACUGCCUCCACAG                                                                | 1    |
| NGS-Star                  | GUGGGUAGGGUUUGGGGAGAGC.....                                                             | 1    |
| NGS-Mature                | .....CUCUCACCACUGCCUCC                                                                  | 1    |
| NGS-Star                  | .....CGUGGGCUGGGUUCAGGGA                                                                | 1    |
| NGS-Mature                | .....CCUCUCACCACUGCCUCCACA                                                              | 1    |
| NGS-Star                  | .....GUUUGGGGAGAGCGUGGGCU                                                               | 1    |
| NGS-Star                  | GUGGGUAGGGUUUGGGGAGAG.....                                                              | 1    |
| NGS-Star                  | .....UGGCGUGGGUUCAGGGAC                                                                 | 1    |
|                           |                                                                                         |      |
| hsa-mir-3145 MI0014170    | UAUAUGAGUUAACUCCAACACUCAAAAACUCAUUUGUAAUGGAAUGAGAUUUUUUGAGUUUUGGAAUUGAACUCGUUAU         |      |
|                           | ((((((((((((((((((((((((((((((((.....))))))))))))))))))))))))))))))                     |      |
| hsa-miR-3145 MIMAT0015016 | .....AGAUUUUUUGAGUUUUGGAAUUG.....                                                       |      |
| NGS-Mature                | .....AGAUUUUUUGAGUUUUGGAAUUG.....                                                       | 149  |
| NGS-Mature                | .....UAUUUUUGAGUUUUGGAAUUG.....                                                         | 37   |
| NGS-Star                  | .....AACUCCAACACUCAAAAACU                                                               | 26   |
| NGS-Mature                | .....UAUUUUUGAGUUUUGGAAUUGA                                                             | 17   |
| NGS-Star                  | .....AACUCCAACACUCAAAAACUCA                                                             | 15   |
| NGS-Mature                | .....AGAUUUUUUGAGUUUUGGAAU                                                              | 13   |
| NGS-Mature                | .....UAUUUUUGAGUUUUGGAAU                                                                | 13   |
| NGS-Mature                | .....AGAUUUUUUGAGUUUUGGAAU                                                              | 8    |
| NGS-Mature                | .....AGAUUUUUUGAGUUUUGGAA                                                               | 5    |
| NGS-Star                  | .....AACUCCAACACUCAAAAACUC                                                              | 4    |
| NGS-Star                  | .....AACUCCAACACUCAAAAAC                                                                | 4    |
| NGS-Mature                | .....AGAUUUUUUGAGUUUUGGA                                                                | 4    |
| NGS-Mature                | .....GAUUUUUUUGAGUUUUGGAAUUG                                                            | 4    |
| NGS-Mature                | .....GAUUUUUUUGAGUUUUGGAAU                                                              | 3    |
| NGS-Star                  | .....AACUCCAACACUCAAAA                                                                  | 1    |
|                           |                                                                                         |      |
| hsa-mir-487a MI0002471    | GGUACUUGAAGAGUGGUUAUCCCGUCUGUUCGCUUAUUUUUAGACGAAUACUACAGGGACAUCCAGUUUUUCAGUAUC          |      |
|                           | ((((((((((((((((((((((((((((((((.....))))))))))))))))))))))))))))))                     |      |
| hsa-miR-487a MIMAT0002178 | .....AAUCAUACAGGGACAUCCAGUU.....                                                        |      |
| NGS-Mature                | .....AAUCAUACAGGGACAUCCAGUU.....                                                        | 2024 |
| NGS-Star                  | .....GUGGUUAUCCCGUCUGUUCG.....                                                          | 363  |
| NGS-Mature                | .....AAUCAUACAGGGACAUCCAGUU.....                                                        | 278  |
| NGS-Mature                | .....AAUCAUACAGGGACAUCCAGU.....                                                         | 119  |
| NGS-Star                  | .....GUGGUUAUCCCGUCUGUUC.....                                                           | 35   |
| NGS-Mature                | .....AUCAUACAGGGACAUCCAGUU.....                                                         | 32   |
| NGS-Mature                | .....AUACAGGGACAUCCAGUU.....                                                            | 26   |
| NGS-Mature                | .....AAUCAUACAGGGACAUCCA.....                                                           | 18   |
| NGS-Mature                | .....AUCAUACAGGGACAUCCAGU.....                                                          | 15   |
| NGS-Mature                | .....AAUCAUACAGGGACAUCCAG.....                                                          | 12   |
| NGS-Mature                | .....AUCAUACAGGGACAUCCAGUU.....                                                         | 11   |
| NGS-Mature                | .....AAUCAUACAGGGACAUCCAGUUU.....                                                       | 8    |
| NGS-Star                  | .....GUGGUUAUCCCGUCUGUUC.....                                                           | 5    |
| NGS-Star                  | .....GUGGUUAUCCCGUCUGUUC.....                                                           | 1    |
|                           |                                                                                         |      |
| hsa-mir-519a-2 MI0003182  | UCUCAGGCUGUGUCCUCUACAGGGAAGCGCUUUUCUGUUGUCUGAAAGAAAGGAAAGUGCAUCCUUUUAGAGUGUUACUGUUUGAGA |      |
|                           | ((((((((((((((((((((((((((((((((.....))))))))))))))))))))))))))))))                     |      |
| hsa-miR-519a MIMAT0002869 | .....AAAGUGCAUCCUUUAGAGUGU.....                                                         |      |
| NGS-Mature                | .....AAAGUGCAUCCUUUAGAGUGU.....                                                         | 1072 |
| NGS-Star                  | .....CCUCUACAGGGAAGCGCUUCU.....                                                         | 212  |
| NGS-Mature                | .....AAAGUGCAUCCUUUAGA.....                                                             | 207  |

|            |                                  |    |
|------------|----------------------------------|----|
| NGS-Mature | .....AAGUGCAUCCUUUAGAGUGU.....   | 36 |
| NGS-Mature | .....AAAGUGCAUCCUUUAGAG.....     | 33 |
| NGS-Mature | .....AAAGUGCAUCCUUUAGAGUG.....   | 30 |
| NGS-Mature | .....AAAGUGCAUCCUUUAGAGU.....    | 23 |
| NGS-Mature | .....AAAGUGCAUCCUUUAGAGUGUU..... | 17 |
| NGS-Star   | .....CCUCUACAGGGAAGCGCUUC.....   | 15 |
| NGS-Mature | .....GUGCAUCCUUUAGAGUGU.....     | 8  |
| NGS-Star   | .....CCUCUACAGGGAAGCGCUUU.....   | 6  |
| NGS-Star   | .....CUCUACAGGGAAGCGCUUCU.....   | 4  |
| NGS-Star   | .....CUCUACAGGGAAGCGCUUU.....    | 1  |
| NGS-Mature | .....GAAAGUGCAUCCUUUAGAGUGU..... | 1  |
| NGS-Mature | .....AAGUGCAUCCUUUAGAGUG.....    | 1  |
| NGS-Star   | .....UACAGGGAAGCGCUUCU.....      | 1  |

|                           |                                                            |     |
|---------------------------|------------------------------------------------------------|-----|
| hsa-mir-1537 MI0007258    | ACAGCUGAAUUAGUCAGUUUCUGUCCUGCCACACAGAAAACCGUCUAGUUACAGUUGU |     |
| hsa-miR-1537 MIMAT0007399 | ((((((((.....))))))))).....                                |     |
| NGS-Mature                | .....AAAACCGUCUAGUUACAGUUGU.....                           | 240 |
| NGS-Mature                | .....AAAACCGUCUAGUUACAGU.....                              | 62  |
| NGS-Mature                | .....AAAACCGUCUAGUUACAGUUG.....                            | 52  |
| NGS-Mature                | .....AAAACCGUCUAGUUACAG.....                               | 48  |
| NGS-Mature                | .....AAAACCGUCUAGUUACAGUUGU.....                           | 38  |
| NGS-Star                  | .....AGCUGAAUUAGUCAGUUUCU.....                             | 25  |
| NGS-Star                  | .....AGCUGAAUUAGUCAGUUUC.....                              | 17  |
| NGS-Star                  | .....CUGAAUUAGUCAGUUUCUGU.....                             | 12  |
| NGS-Mature                | .....AAAACCGUCUAGUUACAGU.....                              | 9   |
| NGS-Mature                | .....AAAACCGUCUAGUUACAGU.....                              | 6   |
| NGS-Mature                | .....AAAACCGUCUAGUUACAGUUG.....                            | 6   |
| NGS-Mature                | .....AGAAAACCGUCUAGUUACAGUU.....                           | 6   |
| NGS-Star                  | .....GCUGAAUUAGUCAGUUUCU.....                              | 6   |
| NGS-Mature                | .....AGAAAACCGUCUAGUUACAGU.....                            | 3   |
| NGS-Star                  | .....AGCUGAAUUAGUCAGUUU.....                               | 3   |
| NGS-Star                  | .....AGCUGAAUUAGUCAGUUU.....                               | 2   |
| NGS-Star                  | .....CUGAAUUAGUCAGUUUCU.....                               | 2   |
| NGS-Star                  | .....CUGAAUUAGUCAGUUUCUG.....                              | 1   |
| NGS-Star                  | .....AGCUGAAUUAGUCAGU.....                                 | 1   |
| NGS-Star                  | .....AGCUGAAUUAGUCAGUU.....                                | 1   |

|                           |                                                                              |    |
|---------------------------|------------------------------------------------------------------------------|----|
| hsa-mir-3155 MI0014183    | UCCGGGCAUCAACUCCACUGCAGAGCCUGGGGAGCCGGACGCUCCUCCAGGCUCUCAGUGGGAACUGAUGCCUGGA |    |
| hsa-miR-3155 MIMAT0015029 | ((((((((.....))))))))).....                                                  |    |
| NGS-Mature                | .....CCAGGCUCUGCAGUGGGAACU.....                                              | 26 |
| NGS-Star                  | .....CCUCCACUGCAGAGCCUGGGGA.....                                             | 11 |
| NGS-Star                  | .....CCUCCACUGCAGAGCCUGG.....                                                | 8  |
| NGS-Mature                | .....CCAGGCUCUGCAGUGGGAAC.....                                               | 7  |
| NGS-Star                  | .....CCUCCACUGCAGAGCCUGGG.....                                               | 5  |
| NGS-Mature                | .....CCAGGCUCUGCAGUGGGA.....                                                 | 5  |
| NGS-Mature                | .....CCAGGCUCUGCAGUGGGAACUG.....                                             | 4  |
| NGS-Star                  | .....CCUCCACUGCAGAGCCUGGG.....                                               | 4  |
| NGS-Mature                | .....CAGGCUCUCAGUGGGAACU.....                                                | 4  |
| NGS-Mature                | .....UCCAGGCUCUGCAGUGGGAAC.....                                              | 4  |
| NGS-Star                  | .....ACCUCCACUGCAGAGCCUGG.....                                               | 3  |
| NGS-Star                  | .....CCUCCACUGCAGAGCCU.....                                                  | 2  |
| NGS-Star                  | .....CCUCCACUGCAGAGCCU.....                                                  | 2  |
| NGS-Star                  | .....ACCUCCACUGCAGAGCCUGGG.....                                              | 2  |
| NGS-Mature                | .....CCAGGCUCUGCAGUGGGAACUGA.....                                            | 2  |
| NGS-Star                  | .....CUCCACUGCAGAGCCUGGGGA.....                                              | 2  |
| NGS-Mature                | .....CAGGCUCUGCAGUGGGAACUG.....                                              | 1  |
| NGS-Star                  | .....UCCACUGCAGAGCCUGGGGAG.....                                              | 1  |

|                          |                                                                                                 |     |
|--------------------------|-------------------------------------------------------------------------------------------------|-----|
| hsa-mir-412 MI0002464    | CUGGGGUACGGGAUGGAGUGGUGCACCAGUUGGAAAGUAAUUGUUUCUAAUUGUACUUCACUCCUGGUCCACUAGCCGUCUCCGUAUCCGUGCAG |     |
| hsa-miR-412 MIMAT0002170 | ((((((((.....))))))))).....                                                                     |     |
| NGS-Star                 | .....ACUUCACUCCUGGUCCACUAGCCGU.....                                                             | 490 |
| NGS-Star                 | .....UGGUCGACCAGUUGGAAAGUAAU.....                                                               | 213 |
| NGS-Star                 | .....UGGUCGACCAGUUGGAAAGUAA.....                                                                | 137 |
| NGS-Star                 | .....UGGUCGACCAGUUGGAAAGU.....                                                                  | 93  |
| NGS-Star                 | .....UGGUCGACCAGUUGGAAAG.....                                                                   | 6   |
| NGS-Mature               | .....ACUUCACUCCUGGUCCACUAGC.....                                                                | 5   |
| NGS-Star                 | .....GGUCGACCAGUUGGAAAGUAAU.....                                                                | 4   |
| NGS-Star                 | .....UGGUCGACCAGUUGGAAAGUAAU.....                                                               | 3   |
| NGS-Star                 | .....GACCAGUUGGAAAGUA.....                                                                      | 2   |
| NGS-Mature               | .....CUUCACUCCUGGUCCACUAGCCG.....                                                               | 2   |
| NGS-Mature               | .....AUGUACUUCACUCCUGGUCCACUAGC.....                                                            | 2   |
| NGS-Star                 | .....GACCAGUUGGAAAGUAAU.....                                                                    | 2   |
| NGS-Star                 | .....UGGUCGACCAGUUGGAAA.....                                                                    | 2   |
| NGS-Mature               | .....UACUUCACUCCUGGUCCACUAGC.....                                                               | 1   |
| NGS-Mature               | .....GUACUUCACUCCUGGUCCACUA.....                                                                | 1   |
| NGS-Mature               | .....UUCACUCCUGGUCCACUAGCCGU.....                                                               | 1   |



```

NGS-Mature .....CGCAGACAAUGCCUACUGGCCUA..... 3
NGS-Mature .....CGCAGACAAUGCCUACUGGCCUAA..... 3
NGS-Mature .....CGCAGACAAUGCCUACUGGCCU..... 2
NGS-Mature .....CUAACGCAGACAAUGCCUACU..... 2
NGS-Star .....GAGGCCAGUAGGCAUUGUCU..... 2
NGS-Star .....GAGGCCAGUAGGCAUUGUCUGC..... 2
NGS-Star .....AGGCAUUGUCUGCGUUAGG..... 1
NGS-Star .....CCAGUAGGCAUUGUCUGCGU..... 1
NGS-Mature .....ACGCAGACAAUGCCUACUGGCCU..... 1
NGS-Star .....AGGCAUUGUCUGCGUUAGGAUU..... 1
NGS-Star .....AGGCCAGUAGGCAUUGUCUG..... 1
NGS-Mature .....GCAGACAAUGCCUACUGGCCUA..... 1
NGS-Mature .....UAACGCAGACAAUGCCUACUGGC..... 1
NGS-Star .....UAGGCAUUGUCUGCGUUAGGA..... 1

hsa-mir-1245 MI0006380 AUUUUUGUAUAGGCCUUUAGAUCAUCUGAUGUUGAAUACUCUUUAAAGUGAUCUAAAGGCCUACAUAUAAA
.(((((((.(((((((((((((((((.....))))))))))))))))))))))))))
hsa-miR-1245 MIMAT0005897 .....AAGUGAUCUAAAGGCCUACAU.....
NGS-Mature .....AAGUGAUCUAAAGGCCUACAU..... 24
NGS-Mature .....AAGUGAUCUAAAGGCCUACAU..... 14
NGS-Mature .....AAGUGAUCUAAAGGCCUACAU..... 7
NGS-Mature .....AAGUGAUCUAAAGGCCUACAU..... 7
NGS-Mature .....UAAUGAUCUAAAGGCCUACAU..... 7
NGS-Mature .....UUAAGUGAUCUAAAGGCCUACA..... 7
NGS-Star .....GUAUAGGCCUUUAGAUCAUCUGA..... 5
NGS-Mature .....UUAAGUGAUCUAAAGGCCUAC..... 4
NGS-Mature .....UGAUCUAAAGGCCUACAUAUAAA..... 2
NGS-Star .....GUAUAGGCCUUUAGAUCAUCUG..... 1
NGS-Star .....UAGGCCUUUAGAUCAUCUGAUG..... 1
NGS-Star .....AUAGGCCUUUAGAUCAUCUGA..... 1
NGS-Star .....UAUAGGCCUUUAGAUCAUCUGA..... 1
NGS-Mature .....UUAAGUGAUCUAAAGGCCUACAU..... 1

hsa-mir-520b MI0003155 CCCUCUACAGGGAAGCGCUUUCUGUUGUCUGAAAGAAAAGAAAGUGCUUCCUUUAGAGGG
(((((((.(((((((((((((((((.....))))))))))))))))))))))))))
hsa-miR-520b MIMAT0002843 .....AAAGUGCUUCCUUUAGAGGG
NGS-Star .....CCUCUACAGGGAAGCGCUUUCU..... 212
NGS-Mature .....AAAGUGCUUCCUUUAGAGGG..... 18
NGS-Star .....CCUCUACAGGGAAGCGCUUUC..... 15
NGS-Mature .....AAAGUGCUUCCUUUAGAGG..... 12
NGS-Mature .....AAAGUGCUUCCUUUAGAGG..... 8
NGS-Mature .....GAAAGUGCUUCCUUUAGAGG..... 7

NGS-Mature .....AAAGUGCUUCCUUUAGA..... 7
NGS-Star .....CCUCUACAGGGAAGCGCUUUC..... 6
NGS-Star .....CUCUACAGGGAAGCGCUUUC..... 4
NGS-Mature .....GAAAGUGCUUCCUUUAG..... 2
NGS-Mature .....GAAAGUGCUUCCUUUAGAG..... 2
NGS-Mature .....AAGUGCUUCCUUUAGAGGG..... 1
NGS-Mature .....AAGUGCUUCCUUUAGAG..... 1
NGS-Star .....CUCUACAGGGAAGCGCUUUC..... 1
NGS-Star .....UACAGGGAAGCGCUUUC..... 1

hsa-mir-521-1 MI0003176 UCUCAGGCUGUGACUCCUCAAAGGGAAGAAUUUCUGUUCUAAAAGAAAAGAACGCACUCCUUUAGAGUGUUACCGUGUGAGA
(((((((.(((((((((((((((((.....))))))))))))))))))))))))))
hsa-miR-521 MIMAT0002854 .....AACGCACUCCUUUAGAGUGU.....
NGS-Mature .....AACGCACUCCUUUAGAGUGU..... 286
NGS-Star .....CCUCCAAGGGAAGAAUUUCU..... 50
NGS-Mature .....CACUCCUUUAGAGUGU..... 14
NGS-Mature .....AACGCACUCCUUUAGAG..... 9
NGS-Mature .....AACGCACUCCUUUAGAGU..... 7
NGS-Mature .....AACGCACUCCUUUAGAGUGUU..... 6
NGS-Mature .....AACGCACUCCUUUAGAGUG..... 5
NGS-Mature .....AACGCACUCCUUUAGA..... 2
NGS-Mature .....CGCACUCCUUUAGAGUGU..... 2
NGS-Mature .....ACGCACUCCUUUAGAGUGU..... 2
NGS-Star .....CUCCAAGGGAAGAAUUUCU..... 1

hsa-mir-521-2 MI0003163 UCUCGGGUGUGACUCUCCAAAGGGAAGAAUUUCUUGUCUAAAAGAAAAGAACGCACUCCUUUAGAGUGUUACCGUGUGAGA
(((((((.(((((((((((((((((.....))))))))))))))))))))))))))
hsa-miR-521 MIMAT0002854 .....AACGCACUCCUUUAGAGUGU.....
NGS-Mature .....AACGCACUCCUUUAGAGUGU..... 286
NGS-Mature .....CACUCCUUUAGAGUGU..... 14
NGS-Mature .....AACGCACUCCUUUAGAG..... 9
NGS-Mature .....AACGCACUCCUUUAGAGU..... 7
NGS-Mature .....AACGCACUCCUUUAGAGUGUU..... 6

NGS-Star .....UCUCCAAGGGAAGAAUUUCU..... 6
NGS-Mature .....AACGCACUCCUUUAGAGUG..... 5

```

```

NGS-Mature .....CGCACUUCUUUAGAGUGU..... 2
NGS-Mature .....ACGCACUUCUUUAGAGUGU..... 2
NGS-Mature .....AACGCACUUCUUUAGA..... 2

hsa-mir-1258 MI0006392 CUGUGGCUUCCACGACCAAUCCUACUCCGCGAGUCCUGGAGUUAGGAUUAAGGUCUGGGAAGCCACAGGA
((((((((((((((((((((((((((((((((((((((((((((((((((((((((((((((((((((((((((((((((((((((((((((((((((((((((
))))))))))))))))))))))))))))))))))))))))))))))))))))))))))))))))))))))))))))))))))))))))))))))))))))))
.....AGUUAGGAUUAGGUCUGGAA.....
NGS-Mature .....AGUUAGGAUUAGGUCUGGAA..... 117
NGS-Mature .....AGUUAGGAUUAGGUCUGGAA..... 60
NGS-Mature .....GAGUUAGGAUUAGGUCUGGAA..... 22
NGS-Mature .....AGUUAGGAUUAGGUCUGG..... 22
NGS-Mature .....AGUUAGGAUUAGGUCUG..... 20
NGS-Mature .....AGUUAGGAUUAGGUCUGGAAG..... 20
NGS-Mature .....AGUUAGGAUUAGGUCUGGAAGC..... 16
NGS-Mature .....UUAGGAUUAGGUCUGGAAGC..... 15
NGS-Mature .....UUAGGAUUAGGUCUGGAAGCCA..... 15
NGS-Mature .....UGGAGUUAGGAUUAGGUCUGG..... 13
NGS-Star .....CACGACCUAAUCCUAACU..... 3
NGS-Star .....CCACGACCUAAUCCUAACU..... 2
NGS-Star .....UCCACGACCUAAUCCUAACUCC..... 2
NGS-Star .....ACGACCUAAUCCUAACUCCUG..... 1
NGS-Star .....UCCACGACCUAAUCCUAAC..... 1
NGS-Star .....UGGCUUCCACGACCUAAUCCUA..... 1
NGS-Star .....CACGACCUAAUCCUAACUCC..... 1

hsa-mir-506 MI0003193 GCCACCACCAUCAGCCUAUCUAGUGUAGUGCCUUAUUCAGGAAGGUGUUACUUAUAGAUUAUUUUUUAAGGCACCCUUCUGAGUAGAUUAGUCAACAUGGACAACAUUUUGUGGGC
((((((((((((((((((((((((((((((((((((((((((((((((((((((((((((((((((((((((((((((((((((((((((((((((((((((((
))))))))))))))))))))))))))))))))))))))))))))))))))))))))))))))))))))))))))))))))))))))))))))))))))))))
.....UAAGGCACCCUUCUGAGUAGA.....
NGS-Mature .....GUAAGGCACCCUUCUGAGUAGA..... 910
NGS-Star .....UAUUCAGGAAGGUGUUACUUA..... 557
NGS-Mature .....UGUAAGGCACCCUUCUGAGUAGA..... 285
NGS-Star .....UAUUCAGGAAGGUGUUACUUAU..... 91
NGS-Mature .....GUAAGGCACCCUUCUGAGUAG..... 59
NGS-Star .....UAUUCAGGAAGGUGUUACUUA..... 54
NGS-Star .....UAUUCAGGAAGGUGUUACUU..... 32
NGS-Mature .....UGUAAGGCACCCUUCUGAGUAG..... 20
NGS-Mature .....GUAAGGCACCCUUCUGAGU..... 19
NGS-Star .....UAUUCAGGAAGGUGUUACUUAUA..... 17
NGS-Star .....UAUUCAGGAAGGUGUUACU..... 12
NGS-Mature .....UGUAAGGCACCCUUCUGAG..... 9
NGS-Mature .....UAAGGCACCCUUCUGAGUAGA..... 9
NGS-Mature .....UUUGUAAGGCACCCUUCUGAGUAGA..... 7
NGS-Mature .....UUGUAAGGCACCCUUCUGAGUAGA..... 5
NGS-Mature .....GUAAGGCACCCUUCUGAGUA..... 4
NGS-Star .....UAUUCAGGAAGGUGUUACUUAUAG..... 4
NGS-Star .....UAUUCAGGAAGGUGUUAC..... 3
NGS-Star .....CUUAUUCAGGAAGGUGUUACUU..... 2
NGS-Star .....UAUUCAGGAAGGUGUUACUUAUAGA..... 2

hsa-mir-552 MI0003557 AACCAUUCAAAUAUACCACAGUUUGUUUAACCUUUUUGCCUGUUGGUAAGAUGCCUUUAACAGGUGACUGGUUAGACAACACUGUGUAUUAACA
((((((((((((((((((((((((((((((((((((((((((((((((((((((((((((((((((((((((((((((((((((((((((((((((((((((((
))))))))))))))))))))))))))))))))))))))))))))))))))))))))))))))))))))))))))))))))))))))))))))))))))))))
.....AACAGGUGACUGGUUAGACAA.....
NGS-Mature .....AACAGGUGACUGGUUAGACAA..... 34
NGS-Mature .....AACAGGUGACUGGUUAGACAAA..... 25
NGS-Mature .....AACAGGUGACUGGUUAGACA..... 21
NGS-Mature .....AACAGGUGACUGGUUAGAC..... 5
NGS-Mature .....CAACAGGUGACUGGUUAGACA..... 3
NGS-Mature .....AACAGGUGACUGGUUAGACAAAC..... 2
NGS-Mature .....AACAGGUGACUGGUUAGA..... 2
NGS-Star .....UGUUUAACCUUUUGCCUGUUG..... 1
NGS-Mature .....ACAGGUGACUGGUUAGACAA..... 1

hsa-mir-665 MI0005563 UCUCUUCGAGGGGUCUCUGCCUUCACCCAGGACUUCUUCAGACCAGGAGGUCAGGCCCCUCACAGGCGGC
((((((((((((((((((((((((((((((((((((((((((((((((((((((((((((((((((((((((((((((((((((((((((((((((((((((((
))))))))))))))))))))))))))))))))))))))))))))))))))))))))))))))))))))))))))))))))))))))))))))))))))))))
.....ACCAGGAGGCUGAGGCCUU.....
NGS-Mature .....ACCAGGAGGCUGAGGCCUUCA..... 245
NGS-Mature .....ACCAGGAGGCUGAGGCCUUCC..... 86
NGS-Mature .....ACCAGGAGGCUGAGGCCUU..... 37
NGS-Mature .....ACCAGGAGGCUGAGGCCUU..... 36
NGS-Mature .....ACCAGGAGGCUGAGGCCUU..... 34
NGS-Mature .....ACCAGGAGGCUGAGGCCUUCCAC..... 12
NGS-Mature .....ACCAGGAGGCUGAGGC..... 11
NGS-Mature .....CCAGGAGGCUGAGGCCUUCA..... 11
NGS-Star .....AGGGGUCUCUGCCUUAACCA..... 4
NGS-Mature .....AGGACUUCUUCAGUACACAGGAGG..... 3
NGS-Mature .....CCAGGAGGCUGAGGCCUUCC..... 2
NGS-Mature .....ACCAGGAGGCUGAGGCCUUACACA..... 2
NGS-Star .....AGGGGUCUCUGCCUUAACCCAGG..... 1
NGS-Star .....AGGGGUCUCUGCCUUAACC..... 1

```

```

hsa-mir-3153 MI0014180      GACAAAUUUUAAAUGUCCUGUCCUCCUCCUCCCAUUAAAGUAGAUUGGGGAAAGCGAGUAGGGACAUUUAAAUUUUUU
((( ((( ((( ((( ((( ((( ((( ((( ((( ((( ((( ((( ((( ((( ((( ((( ((( ((( ((( ((( (((
GGGAAAAGCGAGUAGGGACAUUU.....
NGS-Mature .....GGGAAAAGCGAGUAGGGACAUU..... 54
NGS-Mature .....GGGAAAAGCGAGUAGGGACAUUU..... 19
NGS-Mature .....GGGAAAAGCGAGUAGGGACAUU..... 5
NGS-Mature .....GGGAAAAGCGAGUAGGGACAUUU..... 3
NGS-Mature .....GGGAAAAGCGAGUAGGGACAUUU..... 3
NGS-Mature .....GGGAAAAGCGAGUAGGGACA..... 2
NGS-Mature .....GGGAAAAGCGAGUAGGGACAU..... 2
NGS-Mature .....GGGAAAAGCGAGUAGGGACAUU..... 2
NGS-Mature .....GGGAAAAGCGAGUAGGGACAUU..... 1
NGS-Mature .....GAGUAGGGACAUUUAAAUUUU..... 1
NGS-Mature .....CAUUAAAAGUAGAUUGGG..... 1
NGS-Star .....UGUCCUGUCCUCCUCCUCC..... 1

hsa-mir-2276 MI011282     GUGUUCUCCAGUCCGCCUUCUGACACCUUGCAGCGCCUUCUCUCCGAAUGUCGCAAGUGUCAGAGGGCAGGAGUGGCAGCUGCAU
((( ((( ((( ((( ((( ((( ((( ((( ((( ((( ((( ((( ((( ((( ((( ((( ((( ((( ((( ((( (((
UCUGCAAGUGUCAGAGGCGAGG.....
NGS-Mature .....UCUGCAAGUGUCAGAGGCGAGG..... 27
NGS-Mature .....UCUGCAAGUGUCAGAGGCGAG..... 18
NGS-Mature .....UCUGCAAGUGUCAGAGGCGA..... 7
NGS-Mature .....UCUGCAAGUGUCAGAGGCGA..... 7
NGS-Mature .....UCUGCAAGUGUCAGAGGCGAG..... 6
NGS-Star .....GCCCUUCUGUACCUUGCAGAC..... 4
NGS-Mature .....UCUGCAAGUGUCAGAGGCGA..... 3
NGS-Mature .....UCUGCAAGUGUCAGAGGCG..... 3
NGS-Star .....GCCCUUCUGUACCUUGCAGAC..... 2
NGS-Star .....GCCCUUCUGUACCUUGCAGA..... 2
NGS-Mature .....UGCAAGUGUCAGAGGCGAG..... 2
NGS-Mature .....UCUGCAAGUGUCAGAGGCGAGGAG..... 1
NGS-Mature .....UCGAAGUGUCAGAGGCGA..... 1
NGS-Mature .....UCUGCAAGUGUCAGAGGCGAGGA..... 1
NGS-Star .....CCGCCUUCUGUACCUUGCAGAC..... 1

hsa-mir-520f MI0003146   UCUCAGGCUGUAGCCUUCUAAAGGGAAGCGCUUUCUGUGUCAGAAAGAAAAGCAAGUCUCCUUUUAGAGGGUUACCGUUUGGGA
((( ((( ((( ((( ((( ((( ((( ((( ((( ((( ((( ((( ((( ((( ((( ((( ((( ((( ((( ((( (((
AAGUGCUUCCUUUAGAGGGUU.....
NGS-Mature .....CAAGUGCUUCCUUUAGAGGGU..... 159
NGS-Mature .....CAAGUGCUUCCUUUAGAGGGUU..... 28
NGS-Mature .....CAAGUGCUUCCUUUAGAGGG..... 17
NGS-Mature .....CAAGUGCUUCCUUUAGAG..... 13
NGS-Mature .....CAAGUGCUUCCUUUAGAGG..... 10
NGS-Mature .....CAAGUGCUUCCUUUAGA..... 8
NGS-Mature .....AAGUGCUUCCUUUAGAGGGU..... 6
NGS-Mature .....CAAGUGCUUCCUUUAGAGGGUUA..... 6
NGS-Mature .....AAGUGCUUCCUUUAGAGGGUU..... 5
NGS-Star .....CCUCUAAAAGGGAAGCGCUUUCU..... 5
NGS-Mature .....AAGUGCUUCCUUUAGAGGG..... 1

hsa-mir-544 MI0003515   AUUUUCAUCACCUAGGGAUCUUGUAAAAAGCAGAUUCUGAUUCAGGGACCAAGAUUCUGCAUUUUUAGCAAGUUCUCAAGUGAUGCUAUU
((( ((( ((( ((( ((( ((( ((( ((( ((( ((( ((( ((( ((( ((( ((( ((( ((( ((( ((( ((( (((
AUUCUGCAUUUUUAGCAAGUUC.....
NGS-Star .....UCUUGUAAAAAGCAGAUUCU..... 149
NGS-Mature .....AUUCUGCAUUUUUAGCAAGUU..... 96
NGS-Star .....CUUGUAAAAAGCAGAUUCUGAUU..... 10
NGS-Mature .....AUUCUGCAUUUUUAGCAAGU..... 10
NGS-Star .....CUUGUAAAAAGCAGAUUCUGAU..... 9
NGS-Star .....CUUGUAAAAAGCAGAUUCUGA..... 8
NGS-Star .....UCUUGUAAAAAGCAGAUUC..... 6
NGS-Mature .....AUUCUGCAUUUUUAGCAAG..... 4
NGS-Mature .....AUUCUGCAUUUUUAGCAAGUUC..... 4
NGS-Star .....UCUUGUAAAAAGCAGAUUCUGA..... 3
NGS-Star .....UCUUGUAAAAAGCAGAUUCUG..... 3
NGS-Star .....UAGGGAUCUUGUAAAAAGCAG..... 2
NGS-Mature .....AGAUUCUGCAUUUUUAGCAAGUU..... 2
NGS-Star .....UCUUGUAAAAAGCAGAUU..... 2
NGS-Star .....AUCUUGUAAAAAGCAGAUUCU..... 2
NGS-Mature .....AUUCUGCAUUUUUAGCAA..... 1
NGS-Mature .....CUGAUUCAGGGACCAAGAUUCUGC..... 1

hsa-mir-1976 MI0009986   GCAGCAAGGAAGGCAGGGGUCCUAAAGGUGUGUCCUCCUGCCUCCUUGCUGU
((( ((( ((( ((( ((( ((( ((( ((( ((( ((( ((( ((( ((( ((( ((( ((( ((( ((( ((( ((( (((
CCUCCUGCCUCCUUGCUG.....
NGS-Mature .....CCUCCUGCCUCCUUGCUG..... 7
NGS-Mature .....CUCCUGCCUCCUUGCUG..... 3
NGS-Mature .....CUCCUGCCUCCUUGCUG..... 2
NGS-Mature .....CCUCCUGCCUCCUUGCU..... 2
NGS-Star .....GCAGCAAGGAAGGCAGGGGUCC..... 2
NGS-Mature .....CCUCCUGCCUCCUUGCUG..... 2
NGS-Star .....CAGCAAGGAAGGCAGGGGU..... 2

```









```

hsa-miR-633 MIMAT0003303 .....CUAAUAGUAUCUACCACAAUAAA.....
NGS-Star .....UGCGGUAGAUACUAUUAACCU..... 4
NGS-Star .....UGCGGUAGAUACUAUUAACC..... 1
NGS-Star .....UUGCGGUAGAUACUAUUAACCU..... 1
NGS-Mature .....CUAAUAGUAUCUACCACAAUAAA..... 1

hsa-mir-520g MI0003166 UCCCAUGCUGUGACCCUCUAGAGGAAGCACUUUCUGUUGUUGUCUGAGAAAAACAAAGUCUUCUUUUAGAGUGUUACCGUUUGGGA
(((((((.....)))))))))
hsa-miR-520g MIMAT0002858 .....ACAAAGUCUUCUUUUAGAGUGU.....
hsa-miR-520h MIMAT0002867 .....ACAAAGUCUUCUUUUAGAGU.....
NGS-Mature .....ACAAAGUCUUCUUUUAGAGUGU..... 104
NGS-Mature .....CAAAGUCUUCUUUUAGAGUGU..... 82
NGS-Mature .....ACAAAGUCUUCUUUUAGAGU..... 35
NGS-Mature .....ACAAAGUCUUCUUUUAGAGUG..... 32
NGS-Mature .....ACAAAGUCUUCUUUU..... 18
NGS-Mature .....ACAAAGUCUUCUUUUAGAGUGUU..... 14
NGS-Mature .....CAAAGUCUUCUUUUAGAGUGUU..... 13
NGS-Mature .....ACAAAGUCUUCUUUUAG..... 10
NGS-Mature .....CAAAGUCUUCUUUUAG..... 9
NGS-Mature .....ACAAAGUCUUCUUUUAGAG..... 7
NGS-Star .....CCUCUAGAGGAAGCACUUUCUGU..... 4
NGS-Star .....CCUCUAGAGGAAGCACUUUCUGUU..... 4
NGS-Star .....CCUCUAGAGGAAGCACUU..... 1
NGS-Star .....CCUCUAGAGGAAGCACUUUCU..... 1
NGS-Star .....CUCUAGAGGAAGCACUUUCUGUU..... 1

```



```

hsa-miR-130a MIMAT0000425 .....CAGUGCAAUGUAAAAGGGCAU.....
hsa-miR-130a* MIMAT0004593 .....UUCACAUUUGUCUACUGUCUGC.....
NGS .....CAGUGCAAUGUAAAAGGGCAU..... 170466
NGS .....CAGUGCAAUGUAAAAGG..... 32418
NGS .....CAGUGCAAUGUAAAAGGGCA..... 28162
NGS .....CAGUGCAAUGUAAAAGGGC..... 19848
NGS .....CAGUGCAAUGUAAAAGGG..... 18397
NGS .....CAGUGCAAUGUAAAAGGGCAUU..... 15575
NGS .....AGUGCAAUGUAAAAGGGCAU..... 1927
NGS .....AGUGCAAUGUAAAAGGGC..... 338
NGS .....AGUGCAAUGUAAAAGGG..... 333
NGS .....AGUGCAAUGUAAAAGGGCAUU..... 282
NGS .....GCUCUUUUCACAUUGUCUACU..... 125
NGS .....GCUCUUUUCACAUUGUCUAC..... 43
NGS .....GCUCUUUUCACAUUGUCU..... 21
NGS .....AGCUCUUUUCACAUUGUCUAC..... 9
NGS .....GCUCUUUUCACAUUGUCUA..... 8
NGS .....AGCUCUUUUCACAUUGUCUA..... 5
NGS .....AGCUCUUUUCACAUUGUCUACU..... 3
NGS .....CUCUUUUCACAUUGUCUACU..... 3
NGS .....GCUCUUUUCACAUUGUC..... 3
NGS .....AGCUCUUUUCACAUUGUC..... 3

hsa-mir-516a-1 MI0003180 UCUCAGGCUGGACCUUCGAGGAAAGAAGCACUUUCUGUUGUCUGAAAGAAAAGAAAGUCUCCUUUCAGAGGGUUACGGUUUGAGA
((((((((((((((((((((((((((((((((((((((((((((((((((((((((((((((((((((((((((((((((((((((((((((((((
hsa-miR-516a-3p MIMAT0006778 .....UGCUUCCUUUCAGAGGGU.....
hsa-miR-516a-5p MIMAT0004770 .....UUCUCGAGGAAAGAAGCACUUUC.....
NGS .....UUCUCGAGGAAAGAAGCACUUUC..... 1130
NGS .....UUCUCGAGGAAAGAAGCACUUUC..... 326
NGS .....UUCUCGAGGAAAGAAGCACUUUC..... 243
NGS .....UCUCGAGGAAAGAAGCACUUUCU..... 35
NGS .....AGGAAAGAAGCACUUUCU..... 27
NGS .....UUCUCGAGGAAAGAAGCAC..... 25
NGS .....AAAGUCUCCUUUCAGAGGGU..... 15
NGS .....UUCUCGAGGAAAGAAGCACUU..... 14
NGS .....AAAGUCUCCUUUCAGAGGGU..... 5
NGS .....UUCUCGAGGAAAGAAGCACUUUCUG..... 5
NGS .....AAAGUCUCCUUUCAGA..... 4
NGS .....AAAGUCUCCUUUCAGAGGG..... 3
NGS .....CUCGAGGAAAGAAGCACUUU..... 3
NGS .....UUCUCGAGGAAAGAAGCACU..... 3
NGS .....AAAGUCUCCUUUCAGAGG..... 1

hsa-mir-516a-2 MI0003181 UCUCAGGUUGUGACCUUCGAGGAAAGAAGCACUUUCUGUUGUCUGAAAGAAAAGAAAGUCUCCUUUCAGAGGGUUACGGUUUGAGA
((((((((((((((((((((((((((((((((((((((((((((((((((((((((((((((((((((((((((((((((((((((((((((((((
hsa-miR-516a-3p MIMAT0006778 .....UGCUUCCUUUCAGAGGGU.....
hsa-miR-516a-5p MIMAT0004770 .....UUCUCGAGGAAAGAAGCACUUUC.....
NGS .....UUCUCGAGGAAAGAAGCACUUUC..... 1130
NGS .....UUCUCGAGGAAAGAAGCACUUUC..... 326
NGS .....UUCUCGAGGAAAGAAGCACUUUC..... 243
NGS .....UCUCGAGGAAAGAAGCACUUUCU..... 35
NGS .....AGGAAAGAAGCACUUUCU..... 27
NGS .....UUCUCGAGGAAAGAAGCAC..... 25
NGS .....AAAGUCUCCUUUCAGAGGGU..... 15
NGS .....UUCUCGAGGAAAGAAGCACUU..... 14
NGS .....AAAGUCUCCUUUCAGAGGGU..... 5
NGS .....UUCUCGAGGAAAGAAGCACUUUCUG..... 5
NGS .....AAAGUCUCCUUUCAGA..... 4
NGS .....AAAGUCUCCUUUCAGAGGG..... 3
NGS .....CUCGAGGAAAGAAGCACUUU..... 3
NGS .....UUCUCGAGGAAAGAAGCACU..... 3
NGS .....AAAGUCUCCUUUCAGAGG..... 1

hsa-mir-516b-2 MI0003167 UCUCAUGAUGUGACCAUCUGGAGGUAAGAAGCACUUUGUUGUUUGUUGAAAGAAAGUCUCCUUUCAGAGGGUUACUCUUUGAGA
((((((((((((((((((((((((((((((((((((((((((((((((((((((((((((((((((((((((((((((((((((((((((((((((
hsa-miR-516b* MIMAT0002860 .....UGCUUCCUUUCAGAGGGU.....
hsa-miR-516b MIMAT0002859 .....AUCUGGAGGUAAGAAGCACUUU.....
NGS .....AUCUGGAGGUAAGAAGCACUUUGU..... 450
NGS .....AUCUGGAGGUAAGAAGCACUUU..... 336
NGS .....CAUCUGGAGGUAAGAAGCACUUUGU..... 274

```

|     |                                      |    |
|-----|--------------------------------------|----|
| NGS | .....CCAUCUGGAGGUAAGAAGCACUUU.....   | 75 |
| NGS | .....CAUCUGGAGGUAAGAAGCACUUU.....    | 55 |
| NGS | .....CAUCUGGAGGUAAGAAGCACUUUG.....   | 51 |
| NGS | .....AUCUGGAGGUAAGAAGCACUU.....      | 47 |
| NGS | .....AUCUGGAGGUAAGAAGCACUUUG.....    | 45 |
| NGS | .....CCAUCUGGAGGUAAGAAGCACUUUGU..... | 38 |
| NGS | .....AUCUGGAGGUAAGAAGCACU.....       | 25 |
| NGS | .....AAAGUGCUUCCUUUCAGAGGGU.....     | 15 |
| NGS | .....AAAGUGCUUCCUUUCAGAGGGUU.....    | 5  |
| NGS | .....AAAGUGCUUCCUUUCAGA.....         | 4  |
| NGS | .....AAAGUGCUUCCUUUCAGAGGG.....      | 3  |
| NGS | .....AAAGUGCUUCCUUUCAGAGG.....       | 1  |

```

1 AAUGUGAGACACCCAGGGGUACCUUCUCACUGACUUGCAACAUACAUAUUGUCUUGGUGUGUUGCAAGUCGGUGGAGACGUACCCUUGGUGUCAACCCCU
  .((((((((((((((((((((((((((((((((((((((((((((((((((((((((((((((((((((((((((((((((((((((((((((((((((((
  .UGUUGCAAGUCGGUGGAGACGU . . . . . 17
  .UGUUGCAAGUCGGUGGAGACG . . . . . 6
  .UGUUGCAAGUCGGUGGAG . . . . . 2
  .UGCAAGUCGGUGGAGACGUAC . . . . . 2
  .UGUUGCAAGUCGGUGGAGACGUA . . . . . 2
  .CUCUCUACUGACUUGCAACAU . . . . . 2
  .CUCUCUACUGACUUGCAACAU . . . . . 1

102 AUAGAAAUAACACAUACUGCUGUAUUGUCAGGUAGUAUAGGAUUUAUCACUACCUAGACAAUACAGUAUGUUGUUUAUAUAUUU
  .((((((((((((((((((((((((((((((((((((((((((((((((((((((((((((((((((((((((((((((((((((((((((((((((((((
  .UGCUGUAUUGUCAGGUAGUA . . . . . 12
  .CUGCUGUAUUGUCAGGUAGUA . . . . . 8
  .UGCUGUAUUGUCAGGUAGUAU . . . . . 7
  .UCACUACCUAGACAAUACAGU . . . . . 6
  .GCUGUAUUGUCAGGUAGUA . . . . . 5
  .UGUAUUGUCAGGUAGUAUAGGAU . . . . . 3
  .CUGUAUUGUCAGGUAGUA . . . . . 3
  .GCUGUAUUGUCAGGUAGUA . . . . . 3
  .CUGCUGUAUUGUCAGGUAGU . . . . . 3
  .UGCUGUAUUGUCAGGUAGU . . . . . 3
  .AUUGUCAGGUAGUAUAGGAU . . . . . 2
  .CACUACCUAGACAAUACAGU . . . . . 1
  .UCACUACCUAGACAAUACAG . . . . . 1
  .CUACCUAGACAAUACAGUAUGU . . . . . 1
  .ACUACCUAGACAAUACAGUA . . . . . 1
  .UCACUACCUAGACAAUACAGUAU . . . . . 1
  .ACUACCUAGACAAUACAGUAUGU . . . . . 1
  .ACUACCUAGACAAUACAGUAUG . . . . . 1
  .ACUACCUAGACAAUACAGUAU . . . . . 1

105 CUAUGAAAGCCAGAUUCAGCUUCCCUUCAGAGCCUGGCUUUGGCAUCUAUGAAAGCCAGGCUCUGAAGGGAAGUUGAAUCUUGCUGAGUGG
  .((((((((((((((((((((((((((((((((((((((((((((((((((((((((((((((((((((((((((((((((((((((((((((((((((((
  .UUUCCCUUCAGAGCCUGGCUU . . . . . 29
  .AGCCAGGCUCUGAAGGGAAGU . . . . . 16
  .UUUCCCUUCAGAGCCUGGCUU . . . . . 10
  .CUUCCCUUCAGAGCCUGGCUU . . . . . 9
  .CCAGGCUCUGAAGGGAAGUU . . . . . 9
  .CUUCCCUUCAGAGCCUGGCUU . . . . . 8
  .AGCCAGGCUCUGAAGGGAAGUU . . . . . 5
  .GCCAGGCUCUGAAGGGAAGU . . . . . 4
  .GCCAGGCUCUGAAGGGAAG . . . . . 4
  .AGCCAGGCUCUGAAGGGAAG . . . . . 3
  .UUUCCCUUCAGAGCCUGGCU . . . . . 3
  .CUUCCCUUCAGAGCCUGGC . . . . . 2
  .GCCAGGCUCUGAAGGGAAGUU . . . . . 2
  .CCAGGCUCUGAAGGGAAGU . . . . . 2
  .UUUCCCUUCAGAGCCUGGC . . . . . 2
  .AGCCAGGCUCUGAAGGGAAG . . . . . 2
  .CCAGGCUCUGAAGGGAAG . . . . . 1
  .UUCCCUUCAGAGCCUGGCUU . . . . . 1

11 CGUGUCAACUGUAGGUUGGUGCAAAAGUAUUGUGGUUUUGAAAGUAACUUGGCAGAAACGACAAUGACUUUUGCACCACUAUAUACAUAACA
  .((((((((((((((((((((((((((((((((((((((((((((((((((((((((((((((((((((((((((((((((((((((((((((((((((((
  .AAAAGUAUUGUGGUUUUG . . . . . 249
  .AAAAGUAUUGUGGUUUUG . . . . . 134
  .CAAAAAGUAUUGUGGUUUUG . . . . . 74
  .AAAAGUAUUGUGGUUUUG . . . . . 49
  .CAAAAAGUAUUGUGGUUUUG . . . . . 47
  .AAAAGUAUUGUGGUUUUGA . . . . . 44
  .CAAAAAGUAUUGUGGUUUUGA . . . . . 23
  .UUAGGUUGGUGCAAAAGUAUU . . . . . 17
  .AAAAGUAUUGUGGUUUUG . . . . . 15
  .GAAAAGUAUUGUGGUUUUG . . . . . 12
  .GAAACGACAAUGACUUUUGCA . . . . . 6
  .GAAACGACAAUGACUUUU . . . . . 2
  .GAAACGACAAUGACUUUUGCAC . . . . . 1

14 GAUGUUCUUUCCCAUCCCUUACGUCCACCCCCACUCCUGUUUCUGUGAAUAUUCAACAGGAGUGGGGUGGACUAUAGGAGGAUAGGGAACACAG

```



28

UCUUCCUCUCUGCCUGGAUUUGGUUUUCGAGGCACUUAGUAGGUGAUAGCAUGACUGCCUCACUGACCACUUCGAGUAGGGUUACUC
AAUUGGUUUUCGAGGCACUUAGU
AAUUGGUUUUCGAGGCACUUA
AAUUGGUUUUCGAGGCACUU
AAUUGGUUUUCGAGGCAC
AAUUGGUUUUCGAGGCACUUAG
UUUGGUUUUCGAGGCACUUAGU
AAUUGGUUUUCGAGGCACU
UGACUGCCUCACUGACCACUU
AAUUGGUUUUCGAGGCACUU

30
19
15
6
3
2
2
1
1

30

UCAUAAUAUAUGAAGUACAACUUGGUAUAUUUGUGAAUUGGCUUUUACAAGACCAACUCACGAAGUAUACCAGUAUAUACUUGAUUACAACUA
UUCGGUAUACUUUGUGAAUUGG
UUCGGUAUACUUUGUGAAUUG
UUCGGUAUACUUUGUGAAUU
AAUUGGUUUUCGAGGCACUU
UUCGGUAUACUUUGUGAAU
AACUCACGAAGUAUACCGAAGU
UUCGGUAUACUUUGUGAAUUG
GGUAUACUUUGUGAAUUG
UUCGGUAUACUUUGUGAAUUGG

48
13
12
3
2
2
1
1
1
1

32

UUUAUUGAGCUGACUGGCCUUGUAUGGAGGUUCUAGACCAGUUAAGUUCUACAUGGUAUGGAAACCUUCAAGCAGGCCAAGCAGGAGACAGGUG
UAUGGAGGUUCUAGACCAUGU
UCAUGGAUGGAAACCUUCAAGC
ACAUGGAUGGAAACCUUCAAGC
UAUGGAGGUUCUAGACCAUGU
UCAUGGAUGGAAACCUUCAAGCA
ACAUGGAUGGAAACCUUCAAGCA
AUGGAUGGAAACCUUCAAGCA
CAUGGAUGGAAACCUUCAAG
UCAUGGAUGGAAACCUUCAAG
UAUGGAGGUUCUAGACCAUG
CAUGGAUGGAAACCUUCAAGCA
AUGGAUGGAAACCUUCAAGC
UCAUGGAUGGAAACCUUCA

12
8
7
6
5
3
2
2
2
1
1
1
1

33

AGCAUUUCUAUUAGGUUGGUGCAAAGUGAUUGCAGUGUUGCCAAUAAAAGUAAUGACAAAAUCGAGUACUUUUGCACCAGCCCAAUAUAGCCAA
AAAAGUGAUUGCAGUGUUU
CAAAAACUGCAGUUACUUUUGC
CAAAAACUGCAGUUACUUUUG
AAAAGUGAUUGCAGUGUUUG
AAAAGUGAUUGCAGUGUUUGCC
AAAAACUGCAGUUACUUUUG
CAAAAACUGCAGUUACUUU
AAAAACUGCAGUUACUUUUGC
AAAAACUGCAGUUACUUU
AAAAGUGAUUGCAGUGUUUGC
AAAAGUGAUUGCAGUGUUUGCC
AAAGUGAUUGCAGUGUUU
AAAAGUGAUUGCAGUGUUU
CAAAAACUGCAGUUACUUU
AAAAACUGCAGUUACUUUUGCA
CAAAAACUGCAGUUACUUU
CAAAAAGUGAUUGCAGUGUUUG
AAAGUGAUUGCAGUGUUUG
AAAGUGAUUGCAGUGUUUGCCA

523
419
278
252
151
138
127
106
87
85
38
36
31
30
29
26
25
15
13
13

43

AUGAGUUUGCUUUGUGUCAACACAAACUUGCAGGGUAGAGAUGAUUUUCCUACUUUUCUAGGUUGUUUGGGGCGGGGCAGGGGAACAGAG
UACUUUUUCUAGGUUGUUGGG
UACUUUUUCUAGGUUGUUGGG
UACUUUUUCUAGGUUGUUGGGG

9
7
4



```

..... UCACAAACACCUUGCAGGGUAGA..... 4
..... UCACAAACACCUUGCAGGGUA..... 2
..... UCACAAACACCUUGCAGGGUAG..... 2
..... UCACAAACACCUUGCAGGGUAG..... 1
46 GGCACUUGCUUGGGGUUAGUGAGGACAGGGCAAUUACAGAGAUGGGUUGUGCAGAGGCGACACUUGAAUUUCCUGGGCCUCAGGACUCCUUUCAGACAUGG
(((.....))) ((((((..... ((((((..... ((((((..... ((((((..... ((((((..... ((((((..... ((((((..... ((((((.....
..... UGAGGACAGGGCAAUUUCACGA..... 57
..... UGAGGACAGGGCAAUUUCACG..... 21
..... UGAGGACAGGGCAAUUUCACGAGA..... 11
..... UGAGGACAGGGCAAUUUCAC..... 7
..... UGAGGACAGGGCAAUUUCA..... 6
..... UGAGGACAGGGCAAUUUCACGAG..... 5
..... CUUGGAUUUUCUGGGCCUCAG..... 3
..... GUGAGGACAGGGCAAUUUCAC..... 1
..... GUGCAGAGGCGACACUUG..... 1
..... CUUGGAUUUUCUGGGCCUCA..... 1
..... AGGACAGGGCAAUUUCACGAGAU..... 1
53 UCGUUUGACUCUAUUGGACAGGGGACUGGUUAAUAGAUAACUAACCAAGAAUAUUUUGUUCUGUUAACCCAUCCCUCAUCUAUAGAGUAUAACC
.. ((((((..... ((((((..... ((((((..... ((((((..... ((((((..... ((((((..... ((((((..... ((((((.....
..... AGGGGACUGGUUAAUAGAAUA..... 26
..... GUUCUGUUAACCCAUCCCUCA..... 4
..... AGGGGACUGGUUAAUAGAAUA..... 3
..... AGGGGACUGGUUAAUAGAA..... 2
..... GUUCUGUUAACCCAUCCCUCA..... 1
..... AGGGGACUGGUUAAUAGAA..... 1
..... AGGGGACUGGUUAAUAGAA..... 1
58 AACUAUUUCUAGGUUGAUGCAGAAGUAACUACCGUUUUUCAGUUGAAAGUAUUGGCAAAGACCGGACUACUUUUGCAACAGCCUAAUAGUUUCU
(((..... ((((((..... ((((((..... ((((((..... ((((((..... ((((((..... ((((((..... ((((((.....
..... AAAGACCGUGACUACUUUUGCA..... 9
..... AAAGACCGUGACUACUUUUG..... 6
..... AGAAGUAACUACCGUUUUUGCA..... 5
..... AAAGACCGUGACUACUUUUGC..... 4
..... AAAGACCGUGACUACUUU..... 4
..... AGAAGUAACUACCGUUUUUGC..... 1
..... CAAAGACCGUGACUACUUUUG..... 1
..... AAAGACCGUGACUACUUUUGCAA..... 1
60 GGAGUGGGUAGAGGCAGGGAUCCAGGACUAACUACACUUAUUUUUCUGAAUUAUUUAGUGUAGUAGUCCUGGAUCCCGCCUCUUAUUUCUGAA
(((..... ((((((..... ((((((..... ((((((..... ((((((..... ((((((..... ((((((..... ((((((.....
..... UCCAGGACUAAUACACUUA..... 8
..... UCCAGGACUAAUACACUUA..... 5
..... UAGUGUAGUAGUCCUGGAU..... 4
..... UAGUGUAGUAGUCCUGGAU..... 4
..... UUAAGUGUAGUAGUCCU..... 3
..... AGGCAGGGAUCCAGGACUAAU..... 2
..... UCCAGGACUAAUACACUUA..... 2
..... UUAAGUGUAGUAGUCCUGGAU..... 2
..... AUCCAGGACUAAUACACUUA..... 1
..... UAGUGUAGUAGUCCUGGAU..... 1
..... UUAAGUGUAGUAGUCCUGGAU..... 1
..... AGAGGCAGGGAUCCAGG..... 1
68 AAUAAAAUUAGAAUAGUGAGCAACCCAGUGGGCUAUGGAAUUGUGGAAUGGCAUUUCUUAUUUCUCAGUGGGCCUCUUAACUUAUACUCAAC
..... ((((((..... ((((((..... ((((((..... ((((((..... ((((((..... ((((((..... ((((((..... ((((((.....
..... AACCCAGUGGGCUAUGGAAUUG..... 8
..... AACCCAGUGGGCUAUGGAAUUG..... 8
..... AACCCAGUGGGCUAUGGAAUUG..... 6
..... UUUUCUUAUUUCUAGUGGGCCUC..... 4
..... UUUUCUUAUUUCUAGUGGGCCUC..... 4
..... UUUUCUUAUUUCUAGUGGGCCU..... 3
..... UUUUCUUAUUUCUAGUGGGG..... 2
..... UUUUCUUAUUUCUAGUGGGG..... 1
..... AACCCAGUGGGCUAUGGAAUUG..... 1
..... AACCCAGUGGGCUAUGGA..... 1
..... GAAAUUGUGGAAUGGC..... 1
80 CAACAGCUUACAGCAAUUGGAGAAGAUUGCAGAGUAAGUCCUGAUUAAGAAUUGGAAUUUACUCUGCAAUUCUCCAAUUGCUGACCAUCAUUC

```



```

.....CAAAAACCACAAUACUU..... 1
.....AAAACCACAAUACUUUU..... 1

9 GGGCUGACCCCUAGGGUCAGGUGAGGCCUUGGGGCACAGUGGUGCCAUUCCCUUGUCUCCAGGGCCUCGCCUGUCCUUGAGGUCGGCC
(((((((((((((.((((((((((((((((((((((((((((((((((((((((((((((((((((((((((((((((((((((((((((
.....CCUGUGCUCCAGGGCCUCGC..... 22
.....UGAGGCCUUUGGGGCACAGUGG..... 13
.....UAGGGUCAGGUGAGGCCUUUG..... 3
.....CAGGGCCUCGCCUGUCCUUGA..... 3
.....CCAGGGCCUCGCCUGUCCUU..... 2
.....CCUGUGCUCCAGGGCCUCGCC..... 2
.....GAGGCCUUUGGGGCACAGUGG..... 2
.....UGAGGCCUUUGGGGCACAGUGG..... 2
.....UAGGGUCAGGUGAGGCCUUUG..... 1
.....CCAGGGCCUCGCCUGUCCUUGA..... 1
.....CAGGGCCUCGCCUGUCCUUG..... 1
.....GUGCUCCAGGGCCUCGCCUG..... 1
.....CAGGGCCUCGCCUGUCCUU..... 1

90 GACCAGAAGUUUUGGAUUUUGGACUUUUUCAGAUUUUGGGGAUUAUUUGCAUUAUACUUUAUCCUAAAUCUGAAAAGUCCAAAACCUGAAAUGACCAUAAG
((((((((((((((((((((((((((((((((((((((((((((((((((((((((((((((((((((((((((((((((((((
.....UUGGACUUUUUCAGAUUUGGGGAU..... 34
.....UGGACUUUUUCAGAUUUGGGGAU..... 26
.....UUGGACUUUUUCAGAUUUGGGGA..... 18
.....UGGACUUUUUCAGAUUUGGGGAUA..... 14
.....UGGACUUUUUCAGAUUUGGGGA..... 12
.....UUUGGACUUUUUCAGAUUUGGGGA..... 9
.....AGAAAGUUUUUGGAUUUUG..... 8
.....UUUGGACUUUUUCAGAUUUGG..... 7
.....UUUGGACUUUUUCAGAUUUGGG..... 6
.....UUUGGACUUUUUCAGAUUUGGG..... 5
.....UCCUAAAUCUGAAAAGUCCAAA..... 1
.....UCCUAAAUCUGAAAAGUCCAA..... 1

97 GAUCCAGGGAACCCUAGAGCAGGGGGAUGGCAGAGCAAAAUAUUGGCCUACAGCUGCCUCUUGCCAAAUCGACUGGAUUUUGUGUCUCCAUUCCCCAGAGCUGUCUGAGGUGCUUUG
((((((((((((((((((((((((((((((((((((((((((((((((((((((((((((((((((((((((((((((((((((
.....AGGGGGAUGGCAGAGCAAAAUA..... 1052
.....AGGGGGAUGGCAGAGCAAAAUA..... 351
.....AGGGGGAUGGCAGAGCAAAA..... 87
.....AGGGGGAUGGCAGAGCAAAA..... 66
.....AGGGGGAUGGCAGAGCAAAAUC..... 66
.....CAGGGGGAUGGCAGAGCAAAAUA..... 52
.....AGGGGGAUGGCAGAGCAA..... 52
.....CAGGGGGAUGGCAGAGCAAAAUA..... 42
.....UUUUGUGUCUCCAUUCCCCAG..... 17
.....CAGGGGGAUGGCAGAGCAAAA..... 16
.....UUUUGUGUCUCCAUUCCCCAGA..... 9
.....CAGGGGGAUGGCAGAGCAA..... 9
.....UUUUGUGUCUCCAUUCCCCA..... 4
.....UUUUGUGUCUCCAUUCCCC..... 3
.....UUUUGUGUCUCCAUUCC..... 2
.....UUUUGUGUCUCCAUUCCC..... 2
.....AUUUUGUGUCUCCAUUCCCCAGA..... 1
.....UUUUGUGUCUCCAUUCCCCAG..... 1

99 AGAUGGUAUUGAGUGGUGUCUUUAUAUAACGCCAUGCACUCUGUAGUUUGGUUACACAGUGCAUGGCGUAUAUAUAACUAUCCAUAUCUUCACGC
((((((((((((((((((((((((((((((((((((((((((((((((((((((((((((((((((((((((((((((((((((
.....GUGCAUGGCGUAUAUAUAACA..... 3
.....UAUAUAUAACGCCAUGCACUC..... 1
.....UGCAUGGCGUAUAUAUAACA..... 1
.....UUUAUAUAACGCCAUGCACU..... 1
.....UUUAUAUAACGCCAUGCACUC..... 1
.....AUGGCGUAUAUAUAACACU..... 1

```
